# Supplementary material for: A multi-omics Mendelian randomization identiﬁes putatively causal genes and DNA methylation sites for asthma
Source: PubMed Central journal article supplement — World Allergy Organ J. 2024 Dec 7;17(12):101008. doi: 10.1016/j.waojou.2024.101008 (PMC11667005; doi:10.1016/j.waojou.2024.101008), 2024-12-07
Supplement: mmc1.pdf [file mmc1.pdf]

## Supplementary Table

Table S1 Information of software and R package

Table S2 Information of GEO, QTL, and asthma GWAS dataset

Table S3 Parameters for Virtual Screening Pocket

Table S4 Differential expressed genes in blood of asthma patients

Table S5 Summary-based Mendelian Randomization (SMR) analysis of blood gene expression on asthma in discovery phase (FDR < 0.05, p\_HEIDI > 0.01)

Table S6 Two-Sample Mendelian Randomization (TSMR) analysis of blood gene expression on asthma in the discovery phase

Table S7 SMR analysis of blood gene expression on asthma in replication phase

Table S8 TSMR analysis of blood gene expression on asthma in the replication phase

Table S9 Colocalization analysis between gene expression from eQTLGen and asthma from UKB

Table S10 SMR analysis of blood DNA methylation on asthma in discovery phase (FDR < 0.05, p\_HEIDI > 0.01)

Table S11 TSMR analysis of blood DNA methylation on asthma in discovery phase

Table S12 SMR analysis of blood DNA methylation on asthma in replication phase

Table S13 TSMR analysis of blood DNA methylation on asthma in replication phase

Table S14 Colocalization analysis between DNA methylation from GoDMC and asthma from UKB

Table S15 SMR analysis of blood DNA methylation on gene expression

Table S16 TSMR analysis of blood DNA methylation on gene expression

Table S17 Colocalization analysis between DNA methylation from GoDMC and gene expression from eQTLGen

Table S18 SMR analysis of additional blood DNA methylation on asthma in discovery phase

Table S19 TSMR analysis of additional blood DNA methylation on asthma in discovery phase

Table S20 SMR analysis of additional blood DNA methylation on asthma in replication phase

Table S21 TSMR analysis of additional blood DNA methylation on asthma in replication phase

Table S22 Colocalization analysis between additional DNA methylation from GoDMC and asthma from UKB

Table S23 Mediation analysis using SMR: DNA methylation on asthma through gene expression in discovery phase

Table S24 Mediation analysis using TSMR: DNA methylation on asthma through gene expression in discovery phase

Table S25 Mediation analysis using SMR: DNA methylation on asthma through gene expression in replication phase

Table S26 Mediation analysis using TSMR: DNA methylation on asthma through gene expression in replication phase

Table S27 SMR analysis of lung gene expression on asthma

Table S28 TSMR analysis of lung gene expression on asthma

Table S29 Phenoscanner: Identifying Instrumental Variables Related to Outcomes and Confounding Factors

Table S30 TSMR/SMR analysis of blood gene expression on asthma after removing SNP related to outcomes or confounding factors

Table S31 Drug annotation of positive genes

**Table S1 Information of software and R package**

| Characteristic        | Version | Function                                                                                                 | Reference                                                                                                                                                                                                                                                                                                                                                                              |
|-----------------------|---------|----------------------------------------------------------------------------------------------------------|----------------------------------------------------------------------------------------------------------------------------------------------------------------------------------------------------------------------------------------------------------------------------------------------------------------------------------------------------------------------------------------|
| <b>R package</b>      |         |                                                                                                          |                                                                                                                                                                                                                                                                                                                                                                                        |
| "GEOquery"            | 2.68.0  | Data extraction from GEO datasets                                                                        | Davis S & Meltzer P S. GEOquery: a bridge between the Gene Expression Omnibus (GEO) and BioConductor. <i>Bioinformatics</i> . 2007; 23(14):1846-1847.                                                                                                                                                                                                                                  |
| "limma"               | 3.56.2  | Differentially expressed genes analysis                                                                  | Ritchie M E, Phipson B, Wu D, et al. limma powers differential expression analyses for RNA-sequencing and microarray studies. <i>Nucleic Acids Res</i> . 2015; 43(7):e47.                                                                                                                                                                                                              |
| "ggplot2"             | 3.4.2   | Volcano plot visualization                                                                               | Wickham H. ggplot2: Elegant Graphics for Data Analysis. Springer-Verlag New York. 2016.                                                                                                                                                                                                                                                                                                |
| "ieugwasr"            | 0.1.5   | Linkage disequilibrium clumping                                                                          | G H. ieugwasr: R Interface to the OpenGWAS Database API_. R package version 0.1.5, < <a href="https://github.com/MRCIEU/ieugwasr">https://github.com/MRCIEU/ieugwasr</a> >. 2023.                                                                                                                                                                                                      |
| "TwoSampleMR"         | 0.5.6   | Two sample mendelian randomization analysis                                                              | Hemani G, Zheng J, Elsworth B, et al. The MR-Base platform supports systematic causal inference across the human phenome. <i>Elife</i> . 2018; 7.                                                                                                                                                                                                                                      |
| "forestploter"        | 1.1.0   | Forest plots visualization                                                                               | A D. forestploter: Create Flexible Forest Plot_. R package version 1.1.0, < <a href="https://CRAN.R-project.org/package=forestploter">https://CRAN.R-project.org/package=forestploter</a> >. 2023.                                                                                                                                                                                     |
| "coloc"               | 5.2     | Bayesian co-localization analysis                                                                        | Giambartolomei C, Vukcevic D, Schadt E E, et al. Bayesian test for colocalisation between pairs of genetic association studies using summary statistics. <i>PLoS Genet</i> . 2014; 10(5):e1004383.                                                                                                                                                                                     |
| "phenoscanner"        | 1.0     | Phenotype scanning                                                                                       | PhenoScanner. phenoscanner: R package to query PhenoScanner from R_. R package version 1.0. 2023.                                                                                                                                                                                                                                                                                      |
| "meta"                | 6.5-0   | Meta-analysis                                                                                            | Balduzzi S, R cker G & Schwarzer G. How to perform a meta-analysis with R: a practical tutorial. <i>Evid Based Ment Health</i> . 2019; 22(4):153-160.                                                                                                                                                                                                                                  |
| <b>Software</b>       |         |                                                                                                          |                                                                                                                                                                                                                                                                                                                                                                                        |
| R software            | 4.3.1   | R analysis                                                                                               | Team R C. _R: A Language and Environment for Statistical Computing_. R Foundation for Statistical Computing, Vienna, Austria. < <a href="https://www.R-project.org/">https://www.R-project.org/</a> >. 2023.                                                                                                                                                                           |
| SMR software          | 1.03    | Summary data-based mendelian randomization analysis                                                      | Zhu Z, Zhang F, Hu H, et al. Integration of summary data from GWAS and eQTL studies predicts complex trait gene targets. <i>Nat Genet</i> . 2016; 48(5):481-487.                                                                                                                                                                                                                       |
| AutoDockTools         | 1.5.6   | Preparation of receptor molecules and ligands                                                            | Morris G M, Huey R, Lindstrom W, et al. AutoDock4 and AutoDockTools4: Automated docking with selective receptor flexibility. <i>J Comput Chem</i> . 2009; 30(16):2785-2791.                                                                                                                                                                                                            |
| AutoDock Vina         | 1.1.2   | Blind docking screenings                                                                                 | Trott O & Olson A J. AutoDock Vina: improving the speed and accuracy of docking with a new scoring function, efficient optimization, and multithreading. <i>J Comput Chem</i> . 2010; 31(2):455-461.                                                                                                                                                                                   |
| PyMOL                 | 2.4.0   | Molecular docking visualization                                                                          | Gaudreault F, Morency L P & Najmanovich R J. NRGsuite: a PyMOL plugin to perform docking simulations in real time using FlexAID. <i>Bioinformatics</i> . 2015; 31(23):3856-3858.                                                                                                                                                                                                       |
| <b>Database</b>       |         |                                                                                                          |                                                                                                                                                                                                                                                                                                                                                                                        |
| Open Targets database | NA      | Druggability annotations                                                                                 | Ochoa D, Hercules A, Carmona M, et al. The next-generation Open Targets Platform: reimaged, redesigned, rebuilt. <i>Nucleic Acids Res</i> . 2023; 51(D1):D1353-d1359.                                                                                                                                                                                                                  |
| AlphaFold Database    | NA      | obtaining protein structures ( <a href="https://alphafold.ebi.ac.uk/">https://alphafold.ebi.ac.uk/</a> ) | 1. Jumper J, Evans R, Pritzel A, et al. Highly accurate protein structure prediction with AlphaFold. <i>Nature</i> . 2021; 596(7873):583-589.<br>2. Varadi M, Anyango S, Deshpande M, et al. AlphaFold Protein Structure Database: massively expanding the structural coverage of protein-sequence space with high-accuracy models. <i>Nucleic Acids Res</i> . 2022; 50(D1):D439-d444. |

**Table S2 Information of GEO, QTL, and asthma GWAS dataset**

| Characteristic                                                                  | Resource            | Sample size                                                    | Population ancestry    | Reference                                                                                                                                                                                                                                                                                                                                                                                                           | Data download                                                                                                                       |
|---------------------------------------------------------------------------------|---------------------|----------------------------------------------------------------|------------------------|---------------------------------------------------------------------------------------------------------------------------------------------------------------------------------------------------------------------------------------------------------------------------------------------------------------------------------------------------------------------------------------------------------------------|-------------------------------------------------------------------------------------------------------------------------------------|
| <b>GEO dataset</b>                                                              |                     |                                                                |                        |                                                                                                                                                                                                                                                                                                                                                                                                                     |                                                                                                                                     |
| GSE69683<br>(The largest whole blood asthma dataset currently available in GEO) | GEO                 | Whole blood:<br>Number of cases: 80<br>Number of controls: 371 | European               | 1.Barrett T, Wilhite S E, Ledoux P, et al. NCBI GEO: archive for functional genomics data sets--update. Nucleic Acids Res. 2013; 41(Database issue):D991-995.<br>2. Bigler J, Boedigheimer M, Schofield JPR, et al; U-BIOPRED Study Group I. A Severe Asthma Disease Signature from Gene Expression Profiling of Peripheral Blood from U-BIOPRED Cohorts. Am J Respir Crit Care Med. 2017 May 15;195(10):1311-1320. | <a href="https://www.ncbi.nlm.nih.gov/geo/">https://www.ncbi.nlm.nih.gov/geo/</a>                                                   |
| <b>eQTL dataset</b>                                                             |                     |                                                                |                        |                                                                                                                                                                                                                                                                                                                                                                                                                     |                                                                                                                                     |
| eQTL: Discovery sample<br>(The largest eQTL dataset currently)                  | eQTLGen Consortium  | Whole blood: 31,684                                            | Predominantly European | Võsa U, Claringbould A, Westra H J, et al. Large-scale cis- and trans-eQTL analyses identify thousands of genetic loci and polygenic scores that regulate blood gene expression. Nat Genet. 2021; 53(9):1300-1310.                                                                                                                                                                                                  | <a href="https://www.eqtngen.org/cis-eqtls.html">https://www.eqtngen.org/cis-eqtls.html</a>                                         |
| eQTL: Replication sample                                                        | GTEXV8              | Whole blood: 670                                               | Predominantly European | The GTEx Consortium atlas of genetic regulatory effects across human tissues. Science. 2020; 369(6509):1318-1330.                                                                                                                                                                                                                                                                                                   | <a href="https://yanglab.westlake.edu.cn/software/smr/#DataResource">https://yanglab.westlake.edu.cn/software/smr/#DataResource</a> |
| eQTL: lung tissues                                                              | GTEXV8              | lung tissues: 515                                              | Predominantly European | The GTEx Consortium atlas of genetic regulatory effects across human tissues. Science. 2020; 369(6509):1318-1330.                                                                                                                                                                                                                                                                                                   | <a href="https://yanglab.westlake.edu.cn/software/smr/#DataResource">https://yanglab.westlake.edu.cn/software/smr/#DataResource</a> |
| <b>mQTL dataset</b>                                                             |                     |                                                                |                        |                                                                                                                                                                                                                                                                                                                                                                                                                     |                                                                                                                                     |
| mQTL: Discovery sample<br>(The largest mQTL dataset currently)                  | GoDMC               | Whole blood: 27,750                                            | European               | Min J L, Hemani G, Hannon E, et al. Genomic and phenotypic insights from an atlas of genetic effects on DNA methylation. Nat Genet. 2021; 53(9):1311-1321.                                                                                                                                                                                                                                                          | <a href="http://mqtl.db.godmc.org.uk/index">http://mqtl.db.godmc.org.uk/index</a>                                                   |
| mQTL: Replication sample                                                        | FSH                 | Whole blood: 4,170                                             | European               | Huan T, Joehanes R, Song C, et al. Genome-wide identification of DNA methylation QTLs in whole blood highlights pathways for cardiovascular disease. Nat Commun. 2019; 10(1):4267.                                                                                                                                                                                                                                  | <a href="https://ftp.ncbi.nlm.nih.gov/eqtl/">https://ftp.ncbi.nlm.nih.gov/eqtl/</a>                                                 |
| <b>asthma GWAS dataset</b>                                                      |                     |                                                                |                        |                                                                                                                                                                                                                                                                                                                                                                                                                     |                                                                                                                                     |
| UKB:Discovery sample<br>(GCST90014325)                                          | GWAS Catlog         | Number of cases:<br>56,167<br>Number of controls:<br>352,255   | European               | 1.Sollis E, Mosaku A, Abid A, et al. The NHGRI-EBI GWAS Catalog: knowledgebase and deposition resource. Nucleic Acids Res. 2023; 51(D1):D977-d985<br>2.Valette K, Li Z, Bon-Baret V, et al. Prioritization of candidate causal genes for asthma in susceptibility loci derived from UK Biobank. Commun Biol. 2021; 12:1-12.                                                                                         | <a href="https://www.ebi.ac.uk/gwas/">https://www.ebi.ac.uk/gwas/</a>                                                               |
| TAGC: Replication sample<br>(GCST006862)                                        | GWAS Catlog         | Number of cases:<br>19,954<br>Number of controls:<br>107,715   | European               | 1.Sollis E, Mosaku A, Abid A, et al. The NHGRI-EBI GWAS Catalog: knowledgebase and deposition resource. Nucleic Acids Res. 2023; 51(D1):D977-d985<br>2.Demenais F, Margariite-Jeannin P, Barnes K C, et al. Multiancestry association study identifies new asthma risk loci that colocalize with immune-cell enhancer marks. Nat Genet. 2018; 50(11):1669-1679.                                                     | <a href="https://www.ebi.ac.uk/gwas/">https://www.ebi.ac.uk/gwas/</a>                                                               |
| J10_ASTHMA: Replication sample                                                  | FinnGen, R7 release | Number of cases:<br>32,351<br>Number of controls:<br>180,942   | European               | Kurki M I, Karjalainen J, Palta P, et al. FinnGen provides genetic insights from a well-phenotyped isolated population. Nature. 2023; 613(7944):508-518.                                                                                                                                                                                                                                                            | <a href="https://www.finngen.fi/en">https://www.finngen.fi/en</a>                                                                   |

eQTL, expression quantitative trait loci; mQTL, DNA methylation quantitative trait loci; UKB, the UK Biobank; TAGC, Trans-National Asthma Genetic Consortium.

**Table S3 Parameters for Virtual Screening Pocket**

| Molecular | center_x | center_y | center_z | size_x | size_y | size_z |
|-----------|----------|----------|----------|--------|--------|--------|
| CEP95     | -25.615  | -1.964   | 15.301   | 241.2  | 120.6  | 270.9  |
| ETS1      | -13.238  | 1.755    | -10.017  | 149.4  | 94.5   | 105.3  |
| ITPKB     | -8.483   | -8.483   | -5.428   | 126    | 126    | 126    |
| RBM6      | 0.193    | -18.476  | 6.295    | 6.295  | 173.25 | 173.25 |

**Table S4 Differential expressed genes in blood of asthma patients**

| Gene.symbol  | FC    | expression | pval     | adj.pval |
|--------------|-------|------------|----------|----------|
| XIST         | 3.139 | up         | 2.73E-04 | 3.30E-03 |
| TSIX         | 2.253 | up         | 1.03E-03 | 8.73E-03 |
| OLFM4        | 1.940 | up         | 3.68E-05 | 7.56E-04 |
| DEFA4        | 1.926 | up         | 7.78E-06 | 2.38E-04 |
| CEACAM8      | 1.843 | up         | 6.36E-06 | 2.05E-04 |
| CCL23        | 1.807 | up         | 7.64E-07 | 4.47E-05 |
| LTF          | 1.797 | up         | 5.72E-06 | 1.91E-04 |
| RNASE3       | 1.774 | up         | 3.89E-07 | 2.77E-05 |
| MMP8         | 1.733 | up         | 1.66E-05 | 4.22E-04 |
| ARG1         | 1.715 | up         | 3.75E-06 | 1.41E-04 |
| CRISP3       | 1.700 | up         | 2.31E-06 | 9.84E-05 |
| HP           | 1.665 | up         | 3.59E-09 | 1.05E-06 |
| ANXA3        | 1.658 | up         | 2.70E-10 | 2.08E-07 |
| LCN2         | 1.622 | up         | 3.12E-05 | 6.68E-04 |
| CEACAM6      | 1.614 | up         | 1.69E-05 | 4.26E-04 |
| CD24         | 1.604 | up         | 6.61E-09 | 1.59E-06 |
| BPI          | 1.598 | up         | 4.20E-05 | 8.35E-04 |
| LINC00537    | 1.571 | up         | 1.56E-12 | 1.07E-08 |
| SLPI         | 1.555 | up         | 1.40E-09 | 6.33E-07 |
| CD177        | 1.538 | up         | 4.77E-04 | 4.98E-03 |
| RNASE2       | 1.523 | up         | 5.24E-08 | 6.45E-06 |
| F5           | 1.522 | up         | 2.73E-13 | 2.98E-09 |
| CLEC4D       | 1.510 | up         | 2.80E-05 | 6.16E-04 |
| IL5RA        | 1.488 | up         | 2.47E-05 | 5.63E-04 |
| ORM1         | 1.486 | up         | 1.19E-04 | 1.82E-03 |
| MS4A3        | 1.484 | up         | 7.60E-05 | 1.30E-03 |
| ANKRD22      | 1.482 | up         | 1.88E-06 | 8.56E-05 |
| PRSS33       | 1.477 | up         | 5.58E-04 | 5.60E-03 |
| SH3GL3       | 1.475 | up         | 2.75E-03 | 1.76E-02 |
| INSC         | 1.473 | up         | 5.11E-08 | 6.31E-06 |
| SLC26A8      | 1.435 | up         | 1.92E-06 | 8.67E-05 |
| CAMP         | 1.434 | up         | 1.88E-06 | 8.57E-05 |
| POM121L9P    | 1.432 | up         | 6.99E-03 | 3.45E-02 |
| BCL2A1       | 1.426 | up         | 1.67E-05 | 4.23E-04 |
| ADORA3       | 1.426 | up         | 7.70E-07 | 4.48E-05 |
| CEBPE        | 1.419 | up         | 7.69E-08 | 8.41E-06 |
| FOLR3        | 1.415 | up         | 6.50E-04 | 6.25E-03 |
| S100A12      | 1.414 | up         | 4.24E-08 | 5.64E-06 |
| CLC          | 1.408 | up         | 1.21E-06 | 6.23E-05 |
| OLIG2        | 1.405 | up         | 3.24E-04 | 3.75E-03 |
| NRG1         | 1.400 | up         | 2.74E-04 | 3.31E-03 |
| EVI2A        | 1.398 | up         | 2.07E-04 | 2.72E-03 |
| DSG2-AS1     | 1.397 | up         | 1.20E-03 | 9.75E-03 |
| CTSG         | 1.396 | up         | 8.82E-04 | 7.82E-03 |
| MCEMP1       | 1.395 | up         | 5.32E-09 | 1.37E-06 |
| COX7B        | 1.393 | up         | 6.25E-04 | 6.10E-03 |
| OLAH         | 1.392 | up         | 6.08E-04 | 5.97E-03 |
| CARD16       | 1.392 | up         | 1.32E-08 | 2.50E-06 |
| FCGR1A       | 1.391 | up         | 2.42E-06 | 1.02E-04 |
| FCGR1B       | 1.388 | up         | 3.83E-07 | 2.73E-05 |
| NFE4         | 1.380 | up         | 2.07E-07 | 1.73E-05 |
| MCTP2        | 1.375 | up         | 1.12E-08 | 2.24E-06 |
| DAPK2        | 1.375 | up         | 2.09E-07 | 1.74E-05 |
| VSTM1        | 1.370 | up         | 7.00E-07 | 4.20E-05 |
| SHOX2        | 1.368 | up         | 2.28E-03 | 1.54E-02 |
| LOC105377458 | 1.361 | up         | 9.25E-03 | 4.20E-02 |
| ABCC13       | 1.360 | up         | 9.40E-03 | 4.24E-02 |
| DACH1        | 1.359 | up         | 1.50E-05 | 3.94E-04 |
| ACOT11       | 1.356 | up         | 2.19E-08 | 3.59E-06 |
| TIMM8A       | 1.353 | up         | 5.86E-03 | 3.05E-02 |
| KREMEN1      | 1.353 | up         | 2.88E-05 | 6.30E-04 |
| HCAR3        | 1.352 | up         | 4.25E-11 | 6.11E-08 |
| SLC8A1       | 1.352 | up         | 6.85E-06 | 2.17E-04 |
| CYP1B1-AS1   | 1.351 | up         | 2.14E-06 | 9.38E-05 |
| CASP5        | 1.349 | up         | 2.31E-06 | 9.84E-05 |
| IDO1         | 1.347 | up         | 4.85E-04 | 5.04E-03 |
| LOC100129488 | 1.346 | up         | 4.24E-03 | 2.42E-02 |
| ALOX15       | 1.342 | up         | 5.61E-03 | 2.96E-02 |
| ANKRD28      | 1.339 | up         | 5.07E-03 | 2.75E-02 |
| TCN1         | 1.339 | up         | 5.92E-05 | 1.07E-03 |
| LOC100288781 | 1.336 | up         | 1.45E-06 | 7.10E-05 |
| DSC2         | 1.335 | up         | 2.60E-04 | 3.18E-03 |
| TRPM6        | 1.334 | up         | 3.27E-08 | 4.71E-06 |
| LINC01410    | 1.332 | up         | 4.88E-08 | 6.24E-06 |
| SAMSN1       | 1.329 | up         | 1.27E-05 | 3.47E-04 |
| CACNA1E      | 1.328 | up         | 5.96E-05 | 1.08E-03 |

|              |       |    |          |          |
|--------------|-------|----|----------|----------|
| ACSL1        | 1.325 | up | 2.17E-11 | 4.29E-08 |
| C11orf58     | 1.321 | up | 1.21E-03 | 9.80E-03 |
| LIN7A        | 1.321 | up | 1.95E-06 | 8.75E-05 |
| SIGLEC8      | 1.320 | up | 3.66E-03 | 2.18E-02 |
| DOCK4        | 1.320 | up | 6.34E-04 | 6.15E-03 |
| KIF1B        | 1.318 | up | 1.61E-07 | 1.45E-05 |
| LINC01094    | 1.317 | up | 6.04E-08 | 7.18E-06 |
| PPBP         | 1.316 | up | 2.08E-05 | 4.99E-04 |
| LY96         | 1.315 | up | 9.42E-04 | 8.21E-03 |
| ITGA2B       | 1.315 | up | 2.41E-04 | 3.02E-03 |
| ABCA1        | 1.314 | up | 2.82E-05 | 6.19E-04 |
| IGHA1        | 1.313 | up | 1.52E-06 | 7.34E-05 |
| FAM200B      | 1.312 | up | 6.34E-05 | 1.13E-03 |
| MMP9         | 1.309 | up | 1.11E-03 | 9.26E-03 |
| STOX2        | 1.309 | up | 2.57E-04 | 3.16E-03 |
| TSNAX        | 1.305 | up | 1.58E-08 | 2.88E-06 |
| SYCP1        | 1.304 | up | 1.68E-04 | 2.34E-03 |
| ASPH         | 1.303 | up | 6.90E-04 | 6.53E-03 |
| MOCS1        | 1.303 | up | 2.73E-03 | 1.75E-02 |
| GPR84        | 1.302 | up | 3.57E-07 | 2.60E-05 |
| SMPD3        | 1.302 | up | 5.85E-05 | 1.07E-03 |
| ZNF321P      | 1.301 | up | 5.08E-05 | 9.64E-04 |
| CLEC5A       | 1.299 | up | 1.69E-05 | 4.26E-04 |
| PNPLA1       | 1.299 | up | 3.11E-07 | 2.33E-05 |
| LOC101929497 | 1.297 | up | 6.24E-03 | 3.19E-02 |
| APOBEC3A     | 1.297 | up | 2.36E-07 | 1.91E-05 |
| CR1          | 1.296 | up | 1.48E-10 | 1.42E-07 |
| COMMD8       | 1.295 | up | 3.00E-03 | 1.88E-02 |
| ANKRD12      | 1.293 | up | 5.78E-09 | 1.45E-06 |
| CYP4F2       | 1.292 | up | 1.71E-06 | 8.02E-05 |
| TRIQQ        | 1.292 | up | 1.80E-03 | 1.30E-02 |
| SPTLC3       | 1.288 | up | 2.87E-03 | 1.82E-02 |
| SNORD89      | 1.288 | up | 9.57E-08 | 9.96E-06 |
| PGLYRP1      | 1.287 | up | 6.35E-05 | 1.13E-03 |
| CYP11B1      | 1.287 | up | 1.78E-03 | 1.29E-02 |
| NUDT16P1     | 1.287 | up | 1.15E-07 | 1.12E-05 |
| SLC37A3      | 1.286 | up | 3.11E-05 | 6.66E-04 |
| APOBR        | 1.286 | up | 7.09E-05 | 1.23E-03 |
| FAM120A      | 1.286 | up | 2.21E-07 | 1.81E-05 |
| GAPT         | 1.286 | up | 8.91E-09 | 1.91E-06 |
| BMX          | 1.285 | up | 6.00E-05 | 1.09E-03 |
| EPAS1        | 1.285 | up | 4.60E-05 | 8.95E-04 |
| PGM5         | 1.284 | up | 7.02E-03 | 3.46E-02 |
| IPMK         | 1.284 | up | 2.99E-03 | 1.88E-02 |
| RPUSD3       | 1.284 | up | 4.79E-05 | 9.21E-04 |
| TPST1        | 1.284 | up | 2.76E-03 | 1.77E-02 |
| CNTNAP3B     | 1.284 | up | 1.18E-02 | 4.96E-02 |
| IL1R2        | 1.284 | up | 2.93E-04 | 3.47E-03 |
| HES1         | 1.283 | up | 9.19E-07 | 5.11E-05 |
| ASTN2        | 1.281 | up | 2.86E-03 | 1.81E-02 |
| ABCA13       | 1.278 | up | 2.36E-03 | 1.58E-02 |
| MRVII        | 1.278 | up | 1.92E-06 | 8.65E-05 |
| RPS3A        | 1.277 | up | 2.30E-03 | 1.55E-02 |
| MGC70870     | 1.276 | up | 6.32E-08 | 7.45E-06 |
| JAK2         | 1.276 | up | 1.01E-04 | 1.60E-03 |
| OLR1         | 1.274 | up | 4.23E-04 | 4.56E-03 |
| KCNJ15       | 1.274 | up | 8.12E-05 | 1.35E-03 |
| LOC101929713 | 1.273 | up | 9.75E-03 | 4.35E-02 |
| SLC22A4      | 1.272 | up | 2.92E-07 | 2.23E-05 |
| NDUFB3       | 1.271 | up | 1.21E-06 | 6.20E-05 |
| TLR5         | 1.270 | up | 1.80E-07 | 1.57E-05 |
| GRB10        | 1.269 | up | 2.92E-03 | 1.84E-02 |
| DHRS9        | 1.268 | up | 1.61E-04 | 2.27E-03 |
| ACTA2        | 1.267 | up | 5.37E-05 | 1.00E-03 |
| THSD4        | 1.267 | up | 1.08E-02 | 4.67E-02 |
| IQGAP3       | 1.266 | up | 2.56E-04 | 3.14E-03 |
| LIMK2        | 1.266 | up | 2.12E-06 | 9.33E-05 |
| LILRA5       | 1.266 | up | 6.05E-05 | 1.09E-03 |
| ZNF267       | 1.265 | up | 5.96E-03 | 3.08E-02 |
| DUBR         | 1.265 | up | 9.35E-03 | 4.23E-02 |
| ENTPD1       | 1.265 | up | 3.56E-05 | 7.38E-04 |
| LPAR4        | 1.264 | up | 9.14E-04 | 8.04E-03 |
| CHST15       | 1.264 | up | 2.08E-04 | 2.72E-03 |
| NFIL3        | 1.264 | up | 6.22E-08 | 7.35E-06 |
| FAM186A      | 1.262 | up | 2.97E-03 | 1.87E-02 |
| PLIN5        | 1.261 | up | 6.05E-07 | 3.80E-05 |
| LTB4R        | 1.260 | up | 1.24E-06 | 6.33E-05 |
| ELAVL3       | 1.260 | up | 6.31E-04 | 6.13E-03 |

|              |       |    |          |          |
|--------------|-------|----|----------|----------|
| LILRB2       | 1.260 | up | 3.50E-07 | 2.55E-05 |
| PMP22        | 1.259 | up | 1.10E-02 | 4.73E-02 |
| OVOL2        | 1.259 | up | 1.85E-03 | 1.33E-02 |
| PFKFB2       | 1.259 | up | 3.07E-03 | 1.91E-02 |
| HIST1H3E     | 1.258 | up | 1.92E-03 | 1.37E-02 |
| C10orf128    | 1.257 | up | 1.62E-06 | 7.70E-05 |
| PRUNE2       | 1.256 | up | 2.23E-03 | 1.52E-02 |
| CREB5        | 1.256 | up | 5.99E-08 | 7.16E-06 |
| TMEM88       | 1.256 | up | 3.83E-05 | 7.78E-04 |
| KCTD21       | 1.255 | up | 3.09E-09 | 9.54E-07 |
| WDFY3        | 1.255 | up | 2.68E-06 | 1.10E-04 |
| PLOD2        | 1.255 | up | 1.79E-04 | 2.44E-03 |
| SCAMP1       | 1.255 | up | 6.04E-03 | 3.11E-02 |
| SLC29A1      | 1.254 | up | 4.46E-06 | 1.59E-04 |
| RAB33B       | 1.254 | up | 2.13E-03 | 1.47E-02 |
| SYNE1        | 1.254 | up | 1.89E-04 | 2.54E-03 |
| THBS1        | 1.253 | up | 1.55E-04 | 2.20E-03 |
| GPR34        | 1.253 | up | 3.30E-04 | 3.81E-03 |
| ADGRG3       | 1.252 | up | 5.16E-05 | 9.75E-04 |
| RPS27L       | 1.252 | up | 1.96E-03 | 1.38E-02 |
| ARSB         | 1.252 | up | 2.12E-07 | 1.75E-05 |
| IL18RAP      | 1.251 | up | 6.12E-04 | 6.00E-03 |
| PADI4        | 1.249 | up | 1.12E-04 | 1.73E-03 |
| CES1         | 1.249 | up | 2.01E-03 | 1.41E-02 |
| COL1A1       | 1.249 | up | 1.43E-03 | 1.10E-02 |
| DYSF         | 1.248 | up | 1.27E-05 | 3.47E-04 |
| SLC5A9       | 1.248 | up | 2.52E-04 | 3.12E-03 |
| CYSTM1       | 1.248 | up | 5.10E-06 | 1.76E-04 |
| ACSL4        | 1.248 | up | 1.17E-04 | 1.79E-03 |
| ST3GAL4-AS1  | 1.247 | up | 6.21E-05 | 1.11E-03 |
| GALNT14      | 1.246 | up | 1.28E-04 | 1.91E-03 |
| CCPG1        | 1.246 | up | 2.88E-05 | 6.30E-04 |
| PAQR6        | 1.246 | up | 2.30E-04 | 2.92E-03 |
| S100A8       | 1.246 | up | 3.45E-08 | 4.86E-06 |
| CEACAM1      | 1.246 | up | 1.15E-05 | 3.22E-04 |
| FAR2         | 1.245 | up | 1.38E-04 | 2.02E-03 |
| CCDC126      | 1.245 | up | 6.33E-03 | 3.21E-02 |
| STXBP5       | 1.245 | up | 8.46E-07 | 4.81E-05 |
| BCL6         | 1.245 | up | 1.06E-04 | 1.67E-03 |
| SRGAP1       | 1.244 | up | 1.56E-03 | 1.18E-02 |
| GRIN2B       | 1.244 | up | 6.51E-05 | 1.15E-03 |
| PRICKLE2-AS3 | 1.243 | up | 4.72E-05 | 9.12E-04 |
| POLR2K       | 1.243 | up | 1.73E-03 | 1.27E-02 |
| ADAM8        | 1.243 | up | 1.25E-07 | 1.19E-05 |
| TIMP2        | 1.242 | up | 9.29E-05 | 1.50E-03 |
| F11R         | 1.242 | up | 1.98E-05 | 4.79E-04 |
| ST3GAL6      | 1.241 | up | 1.81E-05 | 4.48E-04 |
| MPO          | 1.241 | up | 1.49E-03 | 1.14E-02 |
| PYGL         | 1.241 | up | 6.11E-09 | 1.51E-06 |
| SGMS1        | 1.241 | up | 4.28E-03 | 2.44E-02 |
| ECHDC3       | 1.240 | up | 4.80E-03 | 2.64E-02 |
| CSTA         | 1.240 | up | 3.47E-05 | 7.23E-04 |
| ST6GALNAC3   | 1.239 | up | 2.74E-04 | 3.31E-03 |
| DRAM1        | 1.239 | up | 6.69E-09 | 1.59E-06 |
| HTATSF1P2    | 1.239 | up | 6.31E-03 | 3.21E-02 |
| LOC100128737 | 1.238 | up | 2.48E-06 | 1.04E-04 |
| CYP4F12      | 1.238 | up | 1.34E-06 | 6.73E-05 |
| OSBPL1A      | 1.238 | up | 1.27E-05 | 3.47E-04 |
| HIST1H2BC    | 1.237 | up | 6.15E-05 | 1.11E-03 |
| JAG1         | 1.237 | up | 2.49E-05 | 5.67E-04 |
| ZNF467       | 1.237 | up | 1.37E-04 | 2.01E-03 |
| LINC00323    | 1.236 | up | 1.46E-03 | 1.12E-02 |
| CNIH4        | 1.236 | up | 6.18E-05 | 1.11E-03 |
| ALPL         | 1.236 | up | 3.22E-04 | 3.73E-03 |
| RRAGD        | 1.236 | up | 1.05E-07 | 1.05E-05 |
| FAS          | 1.235 | up | 2.95E-04 | 3.49E-03 |
| PI3          | 1.235 | up | 5.35E-04 | 5.44E-03 |
| IL4R         | 1.234 | up | 2.62E-06 | 1.08E-04 |
| HRASLS5      | 1.234 | up | 1.31E-05 | 3.54E-04 |
| HRH4         | 1.233 | up | 1.88E-03 | 1.34E-02 |
| FLJ1455      | 1.233 | up | 2.14E-03 | 1.47E-02 |
| CEP350       | 1.232 | up | 9.24E-07 | 5.12E-05 |
| QKI          | 1.232 | up | 6.37E-04 | 6.17E-03 |
| LRG1         | 1.231 | up | 2.47E-04 | 3.07E-03 |
| C18orf32     | 1.230 | up | 8.76E-04 | 7.78E-03 |
| ACKR4        | 1.230 | up | 5.76E-03 | 3.01E-02 |
| HK3          | 1.230 | up | 1.25E-06 | 6.35E-05 |
| MARC1        | 1.230 | up | 1.41E-04 | 2.06E-03 |

|            |       |    |          |          |
|------------|-------|----|----------|----------|
| CKLF       | 1.230 | up | 6.45E-10 | 3.73E-07 |
| HSDL2      | 1.229 | up | 6.81E-05 | 1.19E-03 |
| GLRX       | 1.229 | up | 4.27E-05 | 8.45E-04 |
| LOC728323  | 1.229 | up | 1.83E-03 | 1.32E-02 |
| SULT1B1    | 1.229 | up | 8.22E-04 | 7.41E-03 |
| NFIB       | 1.229 | up | 1.07E-02 | 4.64E-02 |
| KCNV1      | 1.228 | up | 1.35E-03 | 1.06E-02 |
| FOXA2      | 1.228 | up | 1.98E-03 | 1.39E-02 |
| LOC55338   | 1.227 | up | 2.75E-03 | 1.76E-02 |
| PLBD1      | 1.227 | up | 9.87E-06 | 2.87E-04 |
| MSRB3      | 1.227 | up | 7.59E-04 | 6.98E-03 |
| HIST1H2BD  | 1.227 | up | 6.53E-04 | 6.28E-03 |
| MEIOC      | 1.226 | up | 3.38E-04 | 3.87E-03 |
| TPTEP1     | 1.226 | up | 1.22E-06 | 6.28E-05 |
| NQO2       | 1.226 | up | 8.11E-05 | 1.35E-03 |
| FIGN       | 1.226 | up | 1.75E-04 | 2.40E-03 |
| PDK4       | 1.225 | up | 1.09E-02 | 4.71E-02 |
| ROPN1L     | 1.224 | up | 7.14E-05 | 1.23E-03 |
| RPL15      | 1.224 | up | 3.39E-05 | 7.10E-04 |
| RNF175     | 1.224 | up | 4.13E-06 | 1.51E-04 |
| LOC283075  | 1.224 | up | 1.86E-03 | 1.33E-02 |
| ITPR2      | 1.224 | up | 3.96E-04 | 4.34E-03 |
| ZNF354A    | 1.224 | up | 2.98E-03 | 1.87E-02 |
| EPPIN      | 1.223 | up | 4.02E-05 | 8.09E-04 |
| SHOX       | 1.223 | up | 6.19E-03 | 3.17E-02 |
| HIF3A      | 1.223 | up | 1.63E-03 | 1.22E-02 |
| RGPD5      | 1.223 | up | 1.81E-03 | 1.31E-02 |
| C9orf66    | 1.222 | up | 1.05E-05 | 3.01E-04 |
| SSFA2      | 1.222 | up | 1.79E-03 | 1.30E-02 |
| RETN       | 1.222 | up | 5.09E-04 | 5.22E-03 |
| TLR4       | 1.222 | up | 7.84E-04 | 7.16E-03 |
| B3GNT5     | 1.221 | up | 1.20E-03 | 9.76E-03 |
| HECW2      | 1.221 | up | 1.28E-03 | 1.02E-02 |
| ZNF608     | 1.221 | up | 2.16E-04 | 2.79E-03 |
| SIGLEC5    | 1.221 | up | 4.54E-04 | 4.81E-03 |
| HIST2H2AA3 | 1.220 | up | 2.14E-04 | 2.77E-03 |
| C2orf76    | 1.220 | up | 2.71E-04 | 3.28E-03 |
| C9orf84    | 1.220 | up | 4.87E-04 | 5.05E-03 |
| SORT1      | 1.219 | up | 8.28E-06 | 2.51E-04 |
| PIK3R6     | 1.219 | up | 1.92E-04 | 2.57E-03 |
| ARHGAP29   | 1.219 | up | 2.71E-04 | 3.28E-03 |
| KLHL6      | 1.219 | up | 1.63E-05 | 4.16E-04 |
| ADGRE2     | 1.218 | up | 1.25E-04 | 1.87E-03 |
| DAPP1      | 1.217 | up | 2.12E-11 | 4.29E-08 |
| ARHGAP26   | 1.217 | up | 1.58E-06 | 7.55E-05 |
| FAM133A    | 1.217 | up | 6.28E-03 | 3.20E-02 |
| TMEM67     | 1.216 | up | 1.40E-04 | 2.03E-03 |
| C3AR1      | 1.215 | up | 6.11E-06 | 1.99E-04 |
| LRRN1      | 1.215 | up | 8.49E-03 | 3.95E-02 |
| C14orf2    | 1.215 | up | 1.55E-03 | 1.17E-02 |
| ARAP3      | 1.215 | up | 1.13E-04 | 1.75E-03 |
| FAM106A    | 1.215 | up | 5.86E-05 | 1.07E-03 |
| TXN        | 1.215 | up | 3.13E-06 | 1.23E-04 |
| KRCC1      | 1.215 | up | 1.78E-03 | 1.29E-02 |
| NAIP       | 1.215 | up | 5.38E-06 | 1.83E-04 |
| PLXDC2     | 1.214 | up | 7.37E-04 | 6.85E-03 |
| TLR2       | 1.213 | up | 1.28E-05 | 3.50E-04 |
| TP53I11    | 1.213 | up | 1.57E-04 | 2.23E-03 |
| AQP9       | 1.213 | up | 1.76E-09 | 7.24E-07 |
| RHOQ       | 1.212 | up | 1.55E-05 | 4.03E-04 |
| NT5C2      | 1.212 | up | 6.19E-11 | 7.52E-08 |
| DPH3       | 1.212 | up | 1.46E-06 | 7.13E-05 |
| LPCAT2     | 1.212 | up | 1.09E-03 | 9.14E-03 |
| LINC00619  | 1.212 | up | 1.61E-04 | 2.28E-03 |
| IRAK3      | 1.211 | up | 1.22E-04 | 1.85E-03 |
| HEBP2      | 1.211 | up | 3.77E-09 | 1.09E-06 |
| NCF4       | 1.211 | up | 6.63E-07 | 4.05E-05 |
| C9orf72    | 1.211 | up | 9.94E-03 | 4.41E-02 |
| HNMT       | 1.211 | up | 5.08E-03 | 2.76E-02 |
| HIPK3      | 1.211 | up | 3.12E-04 | 3.64E-03 |
| FAM63A     | 1.211 | up | 5.90E-06 | 1.95E-04 |
| ANTXR2     | 1.210 | up | 4.79E-06 | 1.68E-04 |
| RRP12      | 1.210 | up | 4.55E-05 | 8.88E-04 |
| LGALS12    | 1.210 | up | 9.95E-04 | 8.53E-03 |
| IL1RL1     | 1.210 | up | 9.44E-03 | 4.25E-02 |
| PIK3CG     | 1.209 | up | 3.60E-07 | 2.61E-05 |
| CHST13     | 1.209 | up | 1.26E-03 | 1.01E-02 |
| NEGR1-IT1  | 1.208 | up | 1.56E-04 | 2.21E-03 |



|              |       |      |          |          |
|--------------|-------|------|----------|----------|
| LOC101929243 | 1.208 | up   | 6.23E-06 | 2.02E-04 |
| CD163        | 1.208 | up   | 1.10E-04 | 1.71E-03 |
| LTBR         | 1.208 | up   | 2.00E-04 | 2.65E-03 |
| MYCT1        | 1.208 | up   | 3.32E-04 | 3.81E-03 |
| SH3GLB1      | 1.207 | up   | 2.10E-07 | 1.74E-05 |
| LINC01191    | 1.206 | up   | 4.70E-06 | 1.66E-04 |
| RAB32        | 1.206 | up   | 1.22E-08 | 2.38E-06 |
| NHSL2        | 1.206 | up   | 3.97E-07 | 2.79E-05 |
| RAB13        | 1.206 | up   | 2.54E-05 | 5.74E-04 |
| CPT1A        | 1.206 | up   | 8.72E-06 | 2.61E-04 |
| PLXNC1       | 1.206 | up   | 1.88E-07 | 1.62E-05 |
| FLJ31958     | 1.206 | up   | 2.35E-04 | 2.96E-03 |
| DEFT1P       | 1.205 | up   | 9.19E-05 | 1.49E-03 |
| UBE2J1       | 1.205 | up   | 1.59E-07 | 1.43E-05 |
| ASAP1        | 1.204 | up   | 1.12E-06 | 5.88E-05 |
| CHURC1       | 1.204 | up   | 1.21E-04 | 1.83E-03 |
| MEGF9        | 1.204 | up   | 8.95E-06 | 2.67E-04 |
| ALOX5        | 1.204 | up   | 6.03E-09 | 1.50E-06 |
| NAMPT        | 1.204 | up   | 6.01E-03 | 3.11E-02 |
| MYL9         | 1.204 | up   | 8.71E-03 | 4.03E-02 |
| EFCAB6       | 1.204 | up   | 3.47E-05 | 7.24E-04 |
| ZNF578       | 1.203 | up   | 7.32E-05 | 1.26E-03 |
| UBL5         | 1.203 | up   | 7.01E-07 | 4.20E-05 |
| CA4          | 1.203 | up   | 1.23E-03 | 9.91E-03 |
| NDFIP2       | 1.203 | up   | 9.12E-04 | 8.02E-03 |
| IKBIP        | 1.202 | up   | 8.67E-04 | 7.72E-03 |
| MTMR6        | 1.202 | up   | 1.21E-03 | 9.84E-03 |
| DGAT2        | 1.202 | up   | 1.29E-04 | 1.93E-03 |
| RPS17P5      | 1.201 | up   | 2.90E-04 | 3.45E-03 |
| CCDC58P3     | 1.201 | up   | 1.82E-04 | 2.47E-03 |
| DNAJC3-AS1   | 1.201 | up   | 4.32E-04 | 4.63E-03 |
| TOPORS-AS1   | 1.201 | up   | 1.92E-05 | 4.69E-04 |
| MRC1         | 1.201 | up   | 2.43E-04 | 3.04E-03 |
| NDUFA1       | 1.200 | up   | 2.73E-06 | 1.12E-04 |
| COL9A2       | 1.200 | up   | 4.10E-03 | 2.36E-02 |
| SLC39A14     | 1.200 | up   | 5.89E-08 | 7.07E-06 |
| ANKH         | 1.200 | down | 8.29E-05 | 1.37E-03 |
| LOC100507281 | 1.200 | down | 1.10E-04 | 1.70E-03 |
| ZCCHC7       | 1.200 | down | 7.76E-06 | 2.38E-04 |
| IMPDH2       | 1.201 | down | 6.31E-10 | 3.71E-07 |
| CAPRN1       | 1.201 | down | 3.26E-04 | 3.77E-03 |
| RBM19        | 1.201 | down | 2.14E-07 | 1.77E-05 |
| RORC         | 1.201 | down | 8.16E-05 | 1.36E-03 |
| RTN4IP1      | 1.201 | down | 2.63E-06 | 1.09E-04 |
| LOC100287024 | 1.201 | down | 7.02E-08 | 7.97E-06 |
| POLR2J2      | 1.201 | down | 4.45E-05 | 8.74E-04 |
| SIKE1        | 1.201 | down | 3.70E-07 | 2.66E-05 |
| NKTR         | 1.201 | down | 6.36E-03 | 3.23E-02 |
| TAOK1        | 1.202 | down | 5.48E-04 | 5.53E-03 |
| PNPO         | 1.202 | down | 2.67E-09 | 8.79E-07 |
| SNX29        | 1.202 | down | 3.54E-06 | 1.35E-04 |
| XPO7         | 1.202 | down | 2.54E-07 | 2.01E-05 |
| PGM5-AS1     | 1.202 | down | 8.64E-06 | 2.59E-04 |
| TRIO         | 1.202 | down | 4.22E-06 | 1.53E-04 |
| NNT-AS1      | 1.202 | down | 1.74E-04 | 2.39E-03 |
| RIMKLB       | 1.202 | down | 1.95E-06 | 8.75E-05 |
| PSME4        | 1.202 | down | 3.74E-08 | 5.18E-06 |
| SRR          | 1.202 | down | 1.89E-05 | 4.64E-04 |
| KDSR         | 1.203 | down | 1.29E-08 | 2.45E-06 |
| GPAT2        | 1.203 | down | 1.05E-02 | 4.58E-02 |
| SPAG16       | 1.203 | down | 3.70E-03 | 2.20E-02 |
| GNAS         | 1.203 | down | 7.63E-05 | 1.30E-03 |
| BLK          | 1.203 | down | 7.52E-05 | 1.28E-03 |
| FAM226B      | 1.203 | down | 1.75E-04 | 2.40E-03 |
| INTS2        | 1.203 | down | 1.22E-03 | 9.86E-03 |
| STK38        | 1.203 | down | 3.86E-06 | 1.44E-04 |
| RNASEH2B     | 1.203 | down | 1.15E-04 | 1.77E-03 |
| PEX5         | 1.203 | down | 1.08E-04 | 1.68E-03 |
| ARHGEF7      | 1.203 | down | 1.10E-03 | 9.19E-03 |
| CNOT4        | 1.203 | down | 8.61E-07 | 4.89E-05 |
| FOXO1        | 1.203 | down | 4.62E-07 | 3.14E-05 |
| TNFSF4       | 1.203 | down | 5.87E-04 | 5.82E-03 |
| NME7         | 1.203 | down | 1.39E-05 | 3.72E-04 |
| ABHD18       | 1.203 | down | 8.76E-08 | 9.22E-06 |
| INTS10       | 1.204 | down | 5.88E-04 | 5.82E-03 |
| HIVEP3       | 1.204 | down | 1.50E-04 | 2.15E-03 |
| ZNF326       | 1.204 | down | 3.65E-07 | 2.64E-05 |
| ZNF519       | 1.204 | down | 1.72E-06 | 8.04E-05 |

|              |       |      |          |          |
|--------------|-------|------|----------|----------|
| XRCC5        | 1.204 | down | 1.45E-08 | 2.70E-06 |
| RBM39        | 1.204 | down | 8.90E-05 | 1.45E-03 |
| FTX          | 1.204 | down | 7.13E-03 | 3.50E-02 |
| PATZ1        | 1.205 | down | 5.43E-11 | 6.91E-08 |
| RASGRP3      | 1.205 | down | 1.57E-03 | 1.18E-02 |
| UTP20        | 1.205 | down | 2.13E-06 | 9.34E-05 |
| TAF11        | 1.205 | down | 1.24E-06 | 6.31E-05 |
| LOC105371967 | 1.205 | down | 2.77E-05 | 6.13E-04 |
| ZNF37A       | 1.205 | down | 7.86E-10 | 4.22E-07 |
| LOC102724814 | 1.205 | down | 6.46E-07 | 3.99E-05 |
| SLC25A39     | 1.206 | down | 6.17E-03 | 3.16E-02 |
| CLPTM1L      | 1.206 | down | 1.15E-08 | 2.30E-06 |
| PMS2P2       | 1.206 | down | 2.11E-08 | 3.49E-06 |
| TBRG1        | 1.206 | down | 4.58E-07 | 3.12E-05 |
| CASK         | 1.206 | down | 9.06E-05 | 1.47E-03 |
| ZNF830       | 1.206 | down | 1.14E-07 | 1.12E-05 |
| LINC01278    | 1.206 | down | 1.72E-06 | 8.05E-05 |
| DNASE1       | 1.206 | down | 5.19E-06 | 1.78E-04 |
| DGUOK        | 1.206 | down | 3.33E-05 | 7.00E-04 |
| PHF7         | 1.206 | down | 5.72E-09 | 1.44E-06 |
| TEX10        | 1.206 | down | 4.65E-10 | 3.03E-07 |
| GPATCH4      | 1.206 | down | 4.75E-07 | 3.20E-05 |
| AGPAT3       | 1.207 | down | 1.57E-06 | 7.54E-05 |
| MAN1A2       | 1.207 | down | 4.46E-04 | 4.74E-03 |
| PCMTD2       | 1.207 | down | 2.20E-04 | 2.82E-03 |
| AGK          | 1.207 | down | 1.33E-07 | 1.24E-05 |
| PRR5         | 1.207 | down | 1.99E-05 | 4.80E-04 |
| C11orf31     | 1.207 | down | 1.83E-05 | 4.53E-04 |
| RNASET2      | 1.207 | down | 6.13E-06 | 1.99E-04 |
| BCL7A        | 1.207 | down | 1.69E-06 | 7.94E-05 |
| POLH         | 1.207 | down | 3.63E-07 | 2.63E-05 |
| CAPN7        | 1.207 | down | 2.60E-05 | 5.83E-04 |
| DNAJC30      | 1.207 | down | 6.63E-07 | 4.05E-05 |
| ZBTB4        | 1.208 | down | 6.53E-09 | 1.59E-06 |
| KIAA0754     | 1.208 | down | 3.88E-06 | 1.45E-04 |
| ZNF587       | 1.208 | down | 3.71E-06 | 1.40E-04 |
| RBM6         | 1.208 | down | 1.25E-04 | 1.87E-03 |
| CRTC3        | 1.208 | down | 1.68E-05 | 4.24E-04 |
| CNOT7        | 1.208 | down | 2.17E-08 | 3.58E-06 |
| LCMT1-AS2    | 1.208 | down | 2.24E-08 | 3.65E-06 |
| PELP1        | 1.208 | down | 8.35E-09 | 1.84E-06 |
| TSEN2        | 1.208 | down | 1.55E-04 | 2.20E-03 |
| P2RX5        | 1.208 | down | 4.70E-04 | 4.93E-03 |
| ZNF346       | 1.209 | down | 3.20E-08 | 4.70E-06 |
| ZMYND8       | 1.209 | down | 9.08E-09 | 1.92E-06 |
| SEPT11       | 1.209 | down | 7.64E-06 | 2.35E-04 |
| TRD          | 1.209 | down | 4.66E-09 | 1.26E-06 |
| MBNL1        | 1.209 | down | 2.76E-04 | 3.32E-03 |
| KRR1         | 1.209 | down | 2.65E-08 | 4.09E-06 |
| METTL3       | 1.209 | down | 1.35E-06 | 6.76E-05 |
| ZBTB43       | 1.210 | down | 5.63E-09 | 1.43E-06 |
| GPATCH2      | 1.210 | down | 7.19E-07 | 4.28E-05 |
| NFATC2IP     | 1.210 | down | 2.81E-07 | 2.16E-05 |
| XPO1         | 1.210 | down | 2.60E-07 | 2.04E-05 |
| NFATC3       | 1.210 | down | 7.96E-06 | 2.44E-04 |
| LOC100293705 | 1.210 | down | 7.88E-04 | 7.18E-03 |
| VAPB         | 1.210 | down | 1.15E-05 | 3.22E-04 |
| ING5         | 1.210 | down | 1.42E-04 | 2.07E-03 |
| KLRG1        | 1.210 | down | 7.22E-04 | 6.76E-03 |
| APLP2        | 1.210 | down | 1.21E-03 | 9.84E-03 |
| DDHD2        | 1.211 | down | 6.82E-05 | 1.19E-03 |
| HELB         | 1.211 | down | 4.00E-04 | 4.37E-03 |
| CDC14A       | 1.211 | down | 2.28E-06 | 9.74E-05 |
| NDUFA5       | 1.211 | down | 5.51E-05 | 1.02E-03 |
| ZNF285       | 1.211 | down | 6.81E-04 | 6.47E-03 |
| SYNJ2BP      | 1.211 | down | 5.70E-07 | 3.62E-05 |
| BCOR         | 1.211 | down | 2.96E-07 | 2.25E-05 |
| MGC24103     | 1.211 | down | 4.46E-03 | 2.51E-02 |
| AFAP1L2      | 1.212 | down | 6.92E-06 | 2.18E-04 |
| SUZ12P1      | 1.212 | down | 3.27E-03 | 2.00E-02 |
| SLC20A1      | 1.212 | down | 1.22E-07 | 1.18E-05 |
| BCL11B       | 1.212 | down | 1.39E-07 | 1.28E-05 |
| AMIGO1       | 1.212 | down | 1.59E-05 | 4.09E-04 |
| CD1C         | 1.212 | down | 9.34E-06 | 2.75E-04 |
| LOC100293440 | 1.212 | down | 6.39E-03 | 3.24E-02 |
| DNAJC16      | 1.212 | down | 8.16E-11 | 9.11E-08 |
| NFIX         | 1.212 | down | 7.39E-03 | 3.59E-02 |
| SART3        | 1.212 | down | 7.86E-08 | 8.54E-06 |

|              |       |      |          |          |
|--------------|-------|------|----------|----------|
| METTL6       | 1.213 | down | 1.39E-05 | 3.71E-04 |
| HMCES        | 1.213 | down | 4.81E-11 | 6.41E-08 |
| BTLA         | 1.213 | down | 2.57E-04 | 3.16E-03 |
| MAP4K4       | 1.213 | down | 2.65E-07 | 2.07E-05 |
| TNRC6A       | 1.213 | down | 1.30E-07 | 1.22E-05 |
| SMC1A        | 1.213 | down | 1.47E-04 | 2.13E-03 |
| EWSR1        | 1.213 | down | 5.75E-04 | 5.73E-03 |
| GPBP1L1      | 1.213 | down | 1.67E-03 | 1.24E-02 |
| BCLAF1       | 1.213 | down | 1.29E-05 | 3.52E-04 |
| FBRSL1       | 1.213 | down | 2.21E-08 | 3.62E-06 |
| NLK          | 1.214 | down | 7.70E-06 | 2.37E-04 |
| THRAP3       | 1.214 | down | 1.23E-06 | 6.31E-05 |
| GOSR2        | 1.214 | down | 4.55E-04 | 4.81E-03 |
| MED13        | 1.214 | down | 6.42E-06 | 2.07E-04 |
| ZFP82        | 1.214 | down | 4.83E-05 | 9.28E-04 |
| ZNF202       | 1.215 | down | 5.00E-08 | 6.26E-06 |
| YLPM1        | 1.215 | down | 6.10E-07 | 3.82E-05 |
| NOLC1        | 1.215 | down | 3.64E-06 | 1.38E-04 |
| SDC2         | 1.215 | down | 3.05E-04 | 3.57E-03 |
| SEPT8        | 1.215 | down | 5.51E-05 | 1.02E-03 |
| CUL4A        | 1.215 | down | 4.75E-07 | 3.20E-05 |
| SFSWAP       | 1.215 | down | 1.02E-09 | 5.06E-07 |
| DIP2C        | 1.216 | down | 2.89E-04 | 3.45E-03 |
| DUSP5        | 1.216 | down | 2.18E-04 | 2.81E-03 |
| RABGAP1      | 1.216 | down | 6.34E-08 | 7.45E-06 |
| NMT2         | 1.216 | down | 2.69E-04 | 3.27E-03 |
| CD47         | 1.216 | down | 3.24E-04 | 3.75E-03 |
| TXLNG        | 1.216 | down | 9.57E-08 | 9.96E-06 |
| NMNAT3       | 1.217 | down | 2.24E-05 | 5.26E-04 |
| MRAS         | 1.217 | down | 3.64E-04 | 4.08E-03 |
| BANK1        | 1.217 | down | 7.46E-05 | 1.28E-03 |
| KLHL10       | 1.217 | down | 4.70E-08 | 6.08E-06 |
| HSPH1        | 1.217 | down | 3.32E-08 | 4.76E-06 |
| G3BP1        | 1.217 | down | 7.55E-07 | 4.42E-05 |
| KLHL14       | 1.217 | down | 4.75E-03 | 2.63E-02 |
| NOL9         | 1.217 | down | 5.00E-08 | 6.26E-06 |
| CYB561       | 1.218 | down | 2.70E-05 | 6.00E-04 |
| PIK3IP1      | 1.218 | down | 5.97E-08 | 7.15E-06 |
| DIEXF        | 1.218 | down | 9.53E-05 | 1.53E-03 |
| MIS18A       | 1.218 | down | 1.49E-04 | 2.14E-03 |
| GPALPP1      | 1.219 | down | 1.35E-06 | 6.77E-05 |
| ZC3H12B      | 1.219 | down | 5.19E-04 | 5.31E-03 |
| CLIC3        | 1.219 | down | 1.74E-05 | 4.35E-04 |
| NME9         | 1.219 | down | 2.19E-06 | 9.52E-05 |
| ZNF747       | 1.219 | down | 3.09E-11 | 5.46E-08 |
| LRRC1        | 1.219 | down | 6.58E-04 | 6.31E-03 |
| ACSS1        | 1.220 | down | 2.34E-05 | 5.43E-04 |
| PTPRS        | 1.220 | down | 9.41E-06 | 2.76E-04 |
| KIAA1147     | 1.220 | down | 8.72E-06 | 2.61E-04 |
| DDX42        | 1.220 | down | 1.84E-05 | 4.55E-04 |
| LOC100288944 | 1.220 | down | 1.95E-05 | 4.75E-04 |
| KLHL3        | 1.220 | down | 3.65E-05 | 7.52E-04 |
| SCD5         | 1.220 | down | 1.01E-02 | 4.47E-02 |
| G2E3         | 1.220 | down | 1.94E-04 | 2.59E-03 |
| C21orf116    | 1.220 | down | 5.22E-05 | 9.82E-04 |
| TPD52        | 1.220 | down | 2.15E-03 | 1.47E-02 |
| SMAD5        | 1.220 | down | 4.77E-04 | 4.98E-03 |
| SLFN5        | 1.221 | down | 2.35E-04 | 2.96E-03 |
| POU2F2       | 1.221 | down | 2.72E-06 | 1.12E-04 |
| PTGDR        | 1.221 | down | 1.87E-05 | 4.59E-04 |
| NOP14-AS1    | 1.221 | down | 8.95E-09 | 1.91E-06 |
| GPR18        | 1.221 | down | 5.88E-07 | 3.72E-05 |
| FO XK1       | 1.222 | down | 7.12E-09 | 1.65E-06 |
| SUN1         | 1.222 | down | 1.45E-05 | 3.85E-04 |
| SREK1        | 1.222 | down | 9.10E-06 | 2.70E-04 |
| NOP14        | 1.222 | down | 2.09E-08 | 3.48E-06 |
| MMP19        | 1.222 | down | 5.60E-07 | 3.57E-05 |
| SEC62        | 1.222 | down | 2.61E-04 | 3.19E-03 |
| ZNF551       | 1.222 | down | 9.94E-08 | 1.02E-05 |
| CCDC88C      | 1.222 | down | 4.14E-08 | 5.55E-06 |
| MSI2         | 1.222 | down | 2.61E-05 | 5.85E-04 |
| FOSB         | 1.222 | down | 2.73E-05 | 6.06E-04 |
| RUNX1-IT1    | 1.222 | down | 1.38E-06 | 6.89E-05 |
| RHOA         | 1.223 | down | 9.59E-05 | 1.54E-03 |
| ZNF764       | 1.223 | down | 3.73E-06 | 1.40E-04 |
| ZNF831       | 1.223 | down | 5.74E-06 | 1.92E-04 |
| BLOC1S5      | 1.223 | down | 1.96E-05 | 4.77E-04 |
| PCSK7        | 1.224 | down | 3.24E-09 | 9.73E-07 |

|              |       |      |          |          |
|--------------|-------|------|----------|----------|
| ILF3         | 1.224 | down | 6.91E-07 | 4.16E-05 |
| ZMYM2        | 1.224 | down | 1.78E-08 | 3.12E-06 |
| RUFY2        | 1.224 | down | 3.17E-04 | 3.68E-03 |
| VPREB3       | 1.224 | down | 1.85E-03 | 1.33E-02 |
| GSPT1        | 1.224 | down | 3.80E-07 | 2.72E-05 |
| FRG1JP       | 1.224 | down | 1.21E-03 | 9.81E-03 |
| FAM98A       | 1.224 | down | 3.45E-05 | 7.21E-04 |
| CAMTA1       | 1.225 | down | 1.02E-02 | 4.50E-02 |
| GPR180       | 1.225 | down | 3.60E-04 | 4.05E-03 |
| THUMPD3      | 1.225 | down | 7.44E-08 | 8.25E-06 |
| THEM4        | 1.225 | down | 1.23E-05 | 3.38E-04 |
| URB1         | 1.225 | down | 9.69E-08 | 1.00E-05 |
| ST6GALNAC4   | 1.226 | down | 5.57E-05 | 1.03E-03 |
| SEL1L3       | 1.226 | down | 2.82E-05 | 6.20E-04 |
| NUCKS1       | 1.226 | down | 1.11E-06 | 5.84E-05 |
| EP400        | 1.226 | down | 1.07E-05 | 3.05E-04 |
| PEX3         | 1.226 | down | 2.85E-07 | 2.19E-05 |
| ZFAND6       | 1.226 | down | 5.35E-09 | 1.37E-06 |
| NELL2        | 1.226 | down | 1.34E-03 | 1.05E-02 |
| SNCA         | 1.226 | down | 7.82E-03 | 3.73E-02 |
| CCDC91       | 1.226 | down | 6.56E-05 | 1.16E-03 |
| RGP1         | 1.227 | down | 6.31E-09 | 1.55E-06 |
| SPATS2       | 1.227 | down | 4.23E-07 | 2.93E-05 |
| SCFD1        | 1.228 | down | 2.35E-06 | 9.95E-05 |
| FMNL3        | 1.228 | down | 3.22E-04 | 3.73E-03 |
| ZNF330       | 1.228 | down | 1.75E-06 | 8.12E-05 |
| MAP2K7       | 1.228 | down | 6.62E-08 | 7.61E-06 |
| DDI2         | 1.228 | down | 9.16E-09 | 1.94E-06 |
| WDR61        | 1.229 | down | 1.68E-07 | 1.49E-05 |
| RAD51C       | 1.229 | down | 1.47E-06 | 7.17E-05 |
| SNX9         | 1.229 | down | 2.46E-09 | 8.55E-07 |
| USP40        | 1.229 | down | 8.98E-08 | 9.42E-06 |
| CXXC5        | 1.229 | down | 2.00E-09 | 7.58E-07 |
| PCBP2        | 1.230 | down | 2.87E-09 | 9.18E-07 |
| TSPYL5       | 1.230 | down | 5.74E-04 | 5.72E-03 |
| TSR2         | 1.230 | down | 1.11E-11 | 2.63E-08 |
| NUP107       | 1.230 | down | 5.81E-06 | 1.93E-04 |
| GTF3A        | 1.230 | down | 1.40E-07 | 1.28E-05 |
| TASP1        | 1.230 | down | 1.06E-03 | 8.93E-03 |
| LRCH3        | 1.230 | down | 8.95E-06 | 2.67E-04 |
| ESCO1        | 1.230 | down | 2.09E-04 | 2.72E-03 |
| BCORP1       | 1.230 | down | 4.71E-03 | 2.61E-02 |
| DDHD1        | 1.231 | down | 1.11E-05 | 3.14E-04 |
| FCMR         | 1.231 | down | 6.93E-08 | 7.88E-06 |
| CD27         | 1.231 | down | 1.09E-05 | 3.10E-04 |
| TBC1D31      | 1.231 | down | 4.61E-06 | 1.64E-04 |
| CHRM3-AS2    | 1.231 | down | 5.36E-03 | 2.87E-02 |
| RBM17        | 1.231 | down | 1.74E-09 | 7.24E-07 |
| N4BP2L1      | 1.231 | down | 1.67E-05 | 4.24E-04 |
| SUPV3L1      | 1.232 | down | 9.17E-12 | 2.39E-08 |
| HNRNPR       | 1.232 | down | 1.33E-06 | 6.70E-05 |
| THNSL1       | 1.232 | down | 1.34E-03 | 1.06E-02 |
| RAPH1        | 1.232 | down | 1.40E-05 | 3.73E-04 |
| ATXN2L       | 1.232 | down | 2.96E-07 | 2.25E-05 |
| PIK3C2B      | 1.232 | down | 1.73E-05 | 4.34E-04 |
| KLF12        | 1.232 | down | 1.76E-05 | 4.40E-04 |
| PLEKHA2      | 1.233 | down | 1.70E-04 | 2.36E-03 |
| EGOT         | 1.233 | down | 4.05E-05 | 8.14E-04 |
| DPF3         | 1.233 | down | 2.56E-04 | 3.14E-03 |
| LOC101927027 | 1.233 | down | 7.95E-05 | 1.34E-03 |
| RANBP10      | 1.233 | down | 7.44E-07 | 4.39E-05 |
| MYEF2        | 1.233 | down | 6.40E-05 | 1.14E-03 |
| C5orf63      | 1.234 | down | 2.95E-07 | 2.25E-05 |
| OPN3         | 1.234 | down | 4.40E-06 | 1.58E-04 |
| TGIF2        | 1.234 | down | 2.44E-09 | 8.55E-07 |
| CCNC         | 1.234 | down | 2.19E-05 | 5.17E-04 |
| DOCK9        | 1.234 | down | 3.23E-03 | 1.99E-02 |
| TCF12        | 1.234 | down | 3.55E-07 | 2.59E-05 |
| NBAS         | 1.234 | down | 2.25E-08 | 3.65E-06 |
| TTC3         | 1.235 | down | 8.18E-08 | 8.81E-06 |
| EIF4A1       | 1.235 | down | 1.80E-07 | 1.57E-05 |
| ZNF83        | 1.235 | down | 8.64E-06 | 2.59E-04 |
| LILRA4       | 1.235 | down | 7.62E-06 | 2.35E-04 |
| CLK4         | 1.235 | down | 1.47E-03 | 1.13E-02 |
| NAP1L4       | 1.236 | down | 4.66E-09 | 1.26E-06 |
| ATP8B1       | 1.236 | down | 5.42E-11 | 6.91E-08 |
| QSOX2        | 1.236 | down | 4.09E-08 | 5.52E-06 |
| ESYT2        | 1.236 | down | 4.78E-07 | 3.21E-05 |

|           |       |      |          |          |
|-----------|-------|------|----------|----------|
| ZNF160    | 1.236 | down | 1.60E-05 | 4.11E-04 |
| PRICKLE1  | 1.236 | down | 9.35E-07 | 5.16E-05 |
| SLC38A10  | 1.237 | down | 3.42E-08 | 4.86E-06 |
| HIST1H2AE | 1.237 | down | 3.62E-05 | 7.50E-04 |
| PSPC1     | 1.237 | down | 6.78E-09 | 1.59E-06 |
| KMO       | 1.237 | down | 3.66E-05 | 7.54E-04 |
| MORC4     | 1.237 | down | 7.62E-08 | 8.36E-06 |
| ZEB2      | 1.237 | down | 5.30E-04 | 5.39E-03 |
| YBX1      | 1.237 | down | 2.01E-07 | 1.69E-05 |
| EXOSC7    | 1.238 | down | 8.08E-10 | 4.29E-07 |
| DOCK10    | 1.238 | down | 1.57E-06 | 7.53E-05 |
| QSER1     | 1.238 | down | 4.23E-06 | 1.53E-04 |
| FOXP1     | 1.239 | down | 4.74E-05 | 9.14E-04 |
| NAPSB     | 1.239 | down | 1.99E-03 | 1.40E-02 |
| PAX5      | 1.239 | down | 5.56E-04 | 5.59E-03 |
| NSUN6     | 1.239 | down | 2.29E-09 | 8.44E-07 |
| LOXL1-AS1 | 1.239 | down | 1.33E-04 | 1.96E-03 |
| TAF15     | 1.239 | down | 1.40E-06 | 6.93E-05 |
| C2CD2     | 1.239 | down | 3.81E-08 | 5.24E-06 |
| ELP2      | 1.239 | down | 1.35E-08 | 2.56E-06 |
| WHSC1     | 1.239 | down | 2.65E-08 | 4.09E-06 |
| TMPO      | 1.239 | down | 5.12E-03 | 2.77E-02 |
| DCAF8     | 1.240 | down | 3.08E-10 | 2.31E-07 |
| HOXB-AS1  | 1.240 | down | 4.23E-04 | 4.55E-03 |
| NBPF10    | 1.240 | down | 5.01E-06 | 1.73E-04 |
| MTERF4    | 1.240 | down | 1.15E-07 | 1.12E-05 |
| AK5       | 1.241 | down | 1.90E-04 | 2.56E-03 |
| EPB41     | 1.241 | down | 2.18E-03 | 1.49E-02 |
| TEKT4P2   | 1.241 | down | 2.06E-04 | 2.70E-03 |
| IPO9      | 1.241 | down | 2.06E-06 | 9.12E-05 |
| SRGAP2    | 1.241 | down | 3.88E-04 | 4.27E-03 |
| ZBTB20    | 1.241 | down | 1.70E-10 | 1.58E-07 |
| SF1       | 1.242 | down | 7.37E-05 | 1.26E-03 |
| ZDHHC2    | 1.242 | down | 2.18E-08 | 3.59E-06 |
| CAMK2D    | 1.242 | down | 6.19E-06 | 2.01E-04 |
| ATF7IP2   | 1.242 | down | 2.35E-07 | 1.91E-05 |
| SOX6      | 1.242 | down | 3.72E-07 | 2.67E-05 |
| TCEA1     | 1.242 | down | 1.71E-05 | 4.30E-04 |
| METAP1D   | 1.243 | down | 1.18E-06 | 6.10E-05 |
| UNG       | 1.243 | down | 3.08E-09 | 9.54E-07 |
| ALKBH7    | 1.243 | down | 2.17E-06 | 9.46E-05 |
| RGCC      | 1.243 | down | 1.24E-04 | 1.87E-03 |
| TRA       | 1.243 | down | 2.32E-05 | 5.40E-04 |
| GSAP      | 1.243 | down | 1.57E-08 | 2.86E-06 |
| ATP6V1H   | 1.243 | down | 6.61E-08 | 7.61E-06 |
| CCNK      | 1.243 | down | 1.77E-04 | 2.42E-03 |
| ZNF703    | 1.244 | down | 1.12E-04 | 1.73E-03 |
| RGS12     | 1.244 | down | 6.77E-09 | 1.59E-06 |
| ZNF141    | 1.245 | down | 7.71E-10 | 4.17E-07 |
| LIX1      | 1.246 | down | 6.00E-05 | 1.08E-03 |
| CEP104    | 1.246 | down | 1.21E-09 | 5.75E-07 |
| XKR6      | 1.246 | down | 8.28E-06 | 2.51E-04 |
| ATP1A1    | 1.247 | down | 1.33E-07 | 1.24E-05 |
| SCOC-AS1  | 1.247 | down | 2.53E-05 | 5.73E-04 |
| MMD       | 1.247 | down | 1.58E-07 | 1.43E-05 |
| PER3      | 1.247 | down | 8.86E-05 | 1.44E-03 |
| GTPBP4    | 1.247 | down | 2.45E-06 | 1.03E-04 |
| VPS13C    | 1.247 | down | 8.20E-08 | 8.82E-06 |
| NGDN      | 1.247 | down | 2.48E-09 | 8.55E-07 |
| HEMGN     | 1.247 | down | 4.46E-03 | 2.51E-02 |
| COA7      | 1.247 | down | 1.54E-06 | 7.41E-05 |
| LOC283713 | 1.248 | down | 6.79E-04 | 6.46E-03 |
| SHISA4    | 1.248 | down | 1.22E-05 | 3.36E-04 |
| KIAA0368  | 1.248 | down | 1.70E-07 | 1.50E-05 |
| KCNA3     | 1.249 | down | 1.04E-05 | 3.00E-04 |
| BCCIP     | 1.249 | down | 8.87E-07 | 4.99E-05 |
| SEMA6A    | 1.249 | down | 1.52E-06 | 7.34E-05 |
| SLC3A1    | 1.249 | down | 3.38E-05 | 7.08E-04 |
| NRCAM     | 1.249 | down | 4.73E-06 | 1.66E-04 |
| ZDHHC21   | 1.250 | down | 2.04E-06 | 9.06E-05 |
| FLJ10038  | 1.250 | down | 6.76E-07 | 4.10E-05 |
| TRAF3IP1  | 1.250 | down | 5.80E-05 | 1.06E-03 |
| HNRNPA1   | 1.251 | down | 6.46E-07 | 3.99E-05 |
| CAMK4     | 1.251 | down | 4.75E-04 | 4.97E-03 |
| ANAPC5    | 1.251 | down | 1.29E-07 | 1.22E-05 |
| DGCR8     | 1.251 | down | 1.53E-09 | 6.62E-07 |
| EVL       | 1.252 | down | 8.11E-08 | 8.75E-06 |
| LOC286272 | 1.253 | down | 3.28E-07 | 2.44E-05 |

|           |       |      |          |          |
|-----------|-------|------|----------|----------|
| PRR3      | 1.253 | down | 5.24E-08 | 6.45E-06 |
| RBM14     | 1.254 | down | 9.88E-07 | 5.39E-05 |
| CHD6      | 1.254 | down | 3.25E-09 | 9.73E-07 |
| MATR3     | 1.254 | down | 1.86E-06 | 8.50E-05 |
| TGFBR1    | 1.254 | down | 1.97E-09 | 7.58E-07 |
| SNX1      | 1.254 | down | 4.63E-07 | 3.14E-05 |
| SPIB      | 1.254 | down | 3.17E-06 | 1.24E-04 |
| LUC7L     | 1.254 | down | 4.14E-09 | 1.16E-06 |
| SWAP70    | 1.255 | down | 3.01E-05 | 6.52E-04 |
| LINC00494 | 1.255 | down | 1.80E-05 | 4.46E-04 |
| GAR1      | 1.255 | down | 4.36E-11 | 6.11E-08 |
| SPG7      | 1.255 | down | 1.11E-10 | 1.16E-07 |
| YTHDC1    | 1.255 | down | 2.36E-05 | 5.46E-04 |
| ZMYM6     | 1.255 | down | 2.51E-07 | 1.99E-05 |
| CAMSAP1   | 1.255 | down | 1.95E-07 | 1.66E-05 |
| PSMG4     | 1.256 | down | 9.11E-07 | 5.08E-05 |
| GCOM1     | 1.256 | down | 1.29E-04 | 1.92E-03 |
| DDX39B    | 1.256 | down | 1.02E-08 | 2.09E-06 |
| IL21R     | 1.256 | down | 2.86E-08 | 4.33E-06 |
| NXT1      | 1.257 | down | 4.13E-08 | 5.55E-06 |
| CDK9      | 1.257 | down | 3.95E-07 | 2.78E-05 |
| FAM213A   | 1.257 | down | 7.95E-08 | 8.60E-06 |
| CD40      | 1.257 | down | 3.85E-06 | 1.44E-04 |
| CD79B     | 1.258 | down | 7.52E-06 | 2.32E-04 |
| LOC728613 | 1.258 | down | 7.24E-04 | 6.76E-03 |
| MS4A7     | 1.258 | down | 2.55E-05 | 5.75E-04 |
| WASF2     | 1.258 | down | 5.08E-05 | 9.64E-04 |
| ITPKB     | 1.259 | down | 1.04E-07 | 1.05E-05 |
| ZNRD1ASP  | 1.259 | down | 2.47E-04 | 3.07E-03 |
| HIST1H3H  | 1.259 | down | 4.02E-05 | 8.10E-04 |
| AHSA2     | 1.260 | down | 1.26E-03 | 1.01E-02 |
| PIGL      | 1.260 | down | 3.34E-05 | 7.02E-04 |
| ZNF785    | 1.260 | down | 3.53E-11 | 5.85E-08 |
| EIF3B     | 1.261 | down | 7.48E-07 | 4.40E-05 |
| CDKN1C    | 1.261 | down | 6.21E-05 | 1.11E-03 |
| CBX3      | 1.261 | down | 1.17E-05 | 3.25E-04 |
| ZBTB38    | 1.261 | down | 4.28E-08 | 5.66E-06 |
| RPAIN     | 1.261 | down | 1.34E-03 | 1.06E-02 |
| ATM       | 1.261 | down | 1.80E-07 | 1.57E-05 |
| PTPRK     | 1.262 | down | 3.52E-06 | 1.34E-04 |
| CCNL1     | 1.262 | down | 9.36E-04 | 8.16E-03 |
| NAF1      | 1.263 | down | 1.67E-08 | 2.98E-06 |
| IGHG1     | 1.263 | down | 4.44E-03 | 2.51E-02 |
| WDR60     | 1.263 | down | 2.32E-08 | 3.75E-06 |
| CIAPIN1   | 1.263 | down | 1.61E-07 | 1.45E-05 |
| SEMA4C    | 1.263 | down | 1.73E-05 | 4.34E-04 |
| TADA2A    | 1.263 | down | 2.11E-04 | 2.75E-03 |
| SLC15A2   | 1.264 | down | 2.53E-03 | 1.66E-02 |
| NPAT      | 1.264 | down | 6.33E-07 | 3.92E-05 |
| FYN       | 1.265 | down | 3.99E-08 | 5.43E-06 |
| LMLN      | 1.266 | down | 9.74E-09 | 2.03E-06 |
| MUM1      | 1.266 | down | 2.85E-08 | 4.33E-06 |
| LRIG2     | 1.266 | down | 7.24E-07 | 4.30E-05 |
| GOLGA8A   | 1.266 | down | 3.27E-08 | 4.71E-06 |
| PPAT      | 1.266 | down | 3.28E-04 | 3.78E-03 |
| SIK1      | 1.266 | down | 8.96E-07 | 5.01E-05 |
| KLHL42    | 1.267 | down | 1.10E-06 | 5.84E-05 |
| CBX5      | 1.267 | down | 1.07E-08 | 2.16E-06 |
| TTC9      | 1.267 | down | 2.65E-05 | 5.91E-04 |
| SERBP1    | 1.268 | down | 5.90E-12 | 1.93E-08 |
| SHMT2     | 1.268 | down | 1.55E-09 | 6.62E-07 |
| SNX19     | 1.268 | down | 6.23E-07 | 3.89E-05 |
| PRMT2     | 1.269 | down | 1.08E-05 | 3.07E-04 |
| FCRL5     | 1.269 | down | 1.34E-03 | 1.06E-02 |
| AUTS2     | 1.269 | down | 1.92E-06 | 8.67E-05 |
| LINC01550 | 1.270 | down | 4.69E-07 | 3.17E-05 |
| MZB1      | 1.270 | down | 4.71E-04 | 4.93E-03 |
| TRABD2A   | 1.270 | down | 3.29E-05 | 6.93E-04 |
| KATNBL1   | 1.270 | down | 1.30E-03 | 1.03E-02 |
| ZNF512B   | 1.270 | down | 2.03E-07 | 1.71E-05 |
| KDM4B     | 1.270 | down | 4.46E-04 | 4.74E-03 |
| DTWD1     | 1.271 | down | 3.63E-08 | 5.06E-06 |
| FBXO21    | 1.271 | down | 1.96E-10 | 1.65E-07 |
| LINC00996 | 1.271 | down | 4.35E-05 | 8.57E-04 |
| ZMYND11   | 1.272 | down | 6.59E-07 | 4.04E-05 |
| SERPINB9  | 1.273 | down | 1.77E-06 | 8.18E-05 |
| CARD11    | 1.273 | down | 5.87E-09 | 1.47E-06 |
| PDE9A     | 1.273 | down | 2.51E-06 | 1.05E-04 |

|              |       |      |          |          |
|--------------|-------|------|----------|----------|
| ABLIM1       | 1.274 | down | 2.56E-08 | 4.04E-06 |
| CARM1        | 1.274 | down | 8.68E-05 | 1.42E-03 |
| GART         | 1.274 | down | 1.46E-11 | 3.33E-08 |
| CAND1        | 1.275 | down | 9.67E-07 | 5.30E-05 |
| HAUS5        | 1.275 | down | 4.77E-07 | 3.20E-05 |
| PHRF1        | 1.275 | down | 4.03E-06 | 1.48E-04 |
| MBNL2        | 1.276 | down | 1.71E-08 | 3.02E-06 |
| LOC728163    | 1.276 | down | 1.27E-07 | 1.21E-05 |
| SLC16A10     | 1.276 | down | 2.28E-04 | 2.90E-03 |
| CELSR3       | 1.276 | down | 9.24E-07 | 5.12E-05 |
| LOC100131541 | 1.276 | down | 1.83E-06 | 8.40E-05 |
| U2SURP       | 1.277 | down | 4.01E-09 | 1.14E-06 |
| CNN3         | 1.277 | down | 1.29E-03 | 1.03E-02 |
| WASL         | 1.277 | down | 7.30E-06 | 2.27E-04 |
| IKZF3        | 1.277 | down | 5.31E-07 | 3.48E-05 |
| YIPF2        | 1.278 | down | 2.69E-05 | 5.98E-04 |
| FAM210B      | 1.278 | down | 2.04E-03 | 1.43E-02 |
| KDM4C        | 1.279 | down | 5.51E-06 | 1.86E-04 |
| MTUS1        | 1.279 | down | 6.64E-06 | 2.12E-04 |
| KCNQ1OT1     | 1.279 | down | 7.96E-05 | 1.34E-03 |
| TRIB2        | 1.280 | down | 2.48E-09 | 8.55E-07 |
| GATAD1       | 1.280 | down | 5.52E-07 | 3.54E-05 |
| MLLT3        | 1.281 | down | 1.20E-05 | 3.33E-04 |
| FBXO34       | 1.282 | down | 1.85E-05 | 4.57E-04 |
| FUS          | 1.283 | down | 5.39E-07 | 3.49E-05 |
| STAP1        | 1.284 | down | 5.37E-05 | 1.00E-03 |
| ACKR3        | 1.284 | down | 5.57E-07 | 3.56E-05 |
| HSP90AB1     | 1.284 | down | 8.47E-09 | 1.85E-06 |
| C11orf80     | 1.284 | down | 2.26E-05 | 5.30E-04 |
| SNRPA1       | 1.284 | down | 7.23E-08 | 8.09E-06 |
| ATAD5        | 1.285 | down | 4.56E-11 | 6.24E-08 |
| TMEM97       | 1.285 | down | 2.00E-09 | 7.58E-07 |
| CD72         | 1.285 | down | 2.18E-05 | 5.16E-04 |
| SNRPN        | 1.287 | down | 5.35E-07 | 3.48E-05 |
| HLA-DOB      | 1.287 | down | 5.62E-05 | 1.04E-03 |
| MAF          | 1.288 | down | 6.29E-07 | 3.90E-05 |
| CEP95        | 1.288 | down | 7.23E-07 | 4.30E-05 |
| LRPPRC       | 1.289 | down | 1.64E-08 | 2.93E-06 |
| TNIP1        | 1.289 | down | 3.23E-05 | 6.85E-04 |
| LOC100507557 | 1.290 | down | 1.22E-04 | 1.85E-03 |
| ARMC8        | 1.290 | down | 1.45E-06 | 7.09E-05 |
| IFNLR1       | 1.290 | down | 5.44E-06 | 1.84E-04 |
| HTATSF1      | 1.293 | down | 1.68E-05 | 4.24E-04 |
| PCNP         | 1.293 | down | 2.53E-06 | 1.05E-04 |
| PZP          | 1.294 | down | 6.12E-07 | 3.83E-05 |
| SLC6A8       | 1.294 | down | 3.87E-03 | 2.26E-02 |
| HBS1L        | 1.294 | down | 2.61E-07 | 2.05E-05 |
| COBLL1       | 1.295 | down | 8.40E-05 | 1.39E-03 |
| GIMAP5       | 1.296 | down | 5.83E-06 | 1.93E-04 |
| AKT3         | 1.296 | down | 3.78E-10 | 2.60E-07 |
| RCL1         | 1.297 | down | 4.81E-10 | 3.10E-07 |
| SCML1        | 1.298 | down | 1.78E-06 | 8.23E-05 |
| LOC644450    | 1.299 | down | 8.68E-03 | 4.02E-02 |
| ETS1         | 1.299 | down | 8.00E-11 | 9.11E-08 |
| KRT77        | 1.299 | down | 1.71E-03 | 1.26E-02 |
| FAM171A1     | 1.300 | down | 8.85E-07 | 4.99E-05 |
| DKC1         | 1.300 | down | 8.52E-10 | 4.48E-07 |
| SLFNL1       | 1.300 | down | 1.23E-08 | 2.38E-06 |
| PRKXP1       | 1.300 | down | 2.02E-04 | 2.66E-03 |
| TARSL2       | 1.301 | down | 7.79E-07 | 4.52E-05 |
| NAA25        | 1.302 | down | 5.50E-10 | 3.38E-07 |
| FAM208B      | 1.304 | down | 5.54E-07 | 3.56E-05 |
| A2M-AS1      | 1.304 | down | 1.23E-04 | 1.85E-03 |
| PMEP A1      | 1.305 | down | 1.06E-06 | 5.67E-05 |
| CLN8         | 1.306 | down | 2.78E-12 | 1.32E-08 |
| CAND2        | 1.307 | down | 7.44E-07 | 4.39E-05 |
| NAPEPLD      | 1.307 | down | 7.45E-08 | 8.25E-06 |
| PRKCQ-AS1    | 1.307 | down | 5.55E-05 | 1.03E-03 |
| HLA-DOA      | 1.307 | down | 2.99E-06 | 1.19E-04 |
| ZNF131       | 1.308 | down | 2.50E-08 | 3.97E-06 |
| LEF1-AS1     | 1.308 | down | 3.32E-04 | 3.81E-03 |
| RAB30        | 1.308 | down | 4.03E-07 | 2.82E-05 |
| HLA-DPA1     | 1.310 | down | 1.19E-04 | 1.82E-03 |
| SYMPK        | 1.311 | down | 3.08E-07 | 2.31E-05 |
| RBBP4        | 1.311 | down | 3.48E-06 | 1.33E-04 |
| WDR11        | 1.312 | down | 6.60E-06 | 2.11E-04 |
| AQP3         | 1.313 | down | 9.79E-09 | 2.03E-06 |
| CR2          | 1.313 | down | 3.80E-06 | 1.42E-04 |

|              |       |      |          |          |
|--------------|-------|------|----------|----------|
| PCDH9        | 1.314 | down | 1.52E-05 | 3.97E-04 |
| CLDN23       | 1.315 | down | 4.65E-06 | 1.64E-04 |
| ZNF709       | 1.315 | down | 3.56E-05 | 7.40E-04 |
| APBA2        | 1.316 | down | 8.53E-08 | 9.11E-06 |
| ZCCHC18      | 1.322 | down | 4.78E-06 | 1.67E-04 |
| HACD3        | 1.323 | down | 2.07E-09 | 7.81E-07 |
| CCR6         | 1.324 | down | 4.06E-08 | 5.50E-06 |
| PARP14       | 1.324 | down | 3.84E-04 | 4.24E-03 |
| APOOL        | 1.324 | down | 5.28E-07 | 3.47E-05 |
| EPPK1        | 1.325 | down | 2.01E-06 | 8.93E-05 |
| MAP2K5       | 1.326 | down | 4.74E-09 | 1.28E-06 |
| LARGE1       | 1.327 | down | 3.63E-05 | 7.51E-04 |
| HACD2        | 1.328 | down | 1.80E-06 | 8.30E-05 |
| HNRNPH1      | 1.329 | down | 2.88E-07 | 2.21E-05 |
| NUP62        | 1.329 | down | 7.08E-09 | 1.65E-06 |
| LEF1         | 1.329 | down | 4.26E-08 | 5.64E-06 |
| TTN          | 1.330 | down | 8.76E-08 | 9.22E-06 |
| ZNF275       | 1.332 | down | 5.99E-12 | 1.93E-08 |
| ZNF662       | 1.333 | down | 2.40E-06 | 1.01E-04 |
| LARGE-AS1    | 1.333 | down | 1.63E-08 | 2.93E-06 |
| WDR4         | 1.335 | down | 5.06E-06 | 1.75E-04 |
| CD79A        | 1.336 | down | 1.23E-05 | 3.38E-04 |
| TRAF3IP2     | 1.336 | down | 1.28E-07 | 1.21E-05 |
| FAM129C      | 1.337 | down | 7.87E-07 | 4.55E-05 |
| RORA         | 1.338 | down | 1.43E-06 | 7.03E-05 |
| OSBPL10      | 1.338 | down | 4.16E-05 | 8.29E-04 |
| FCRL1        | 1.339 | down | 6.61E-04 | 6.34E-03 |
| CD22         | 1.340 | down | 3.55E-05 | 7.38E-04 |
| ABCB4        | 1.341 | down | 9.78E-06 | 2.85E-04 |
| SCAF4        | 1.342 | down | 3.36E-07 | 2.48E-05 |
| DDX17        | 1.342 | down | 5.02E-05 | 9.56E-04 |
| NASP         | 1.343 | down | 9.54E-07 | 5.26E-05 |
| FBNP4        | 1.345 | down | 1.96E-07 | 1.66E-05 |
| ZNF496       | 1.347 | down | 5.52E-09 | 1.41E-06 |
| POU6F1       | 1.347 | down | 2.76E-07 | 2.14E-05 |
| SLC16A7      | 1.348 | down | 1.69E-06 | 7.94E-05 |
| HIST1H1D     | 1.349 | down | 8.56E-06 | 2.58E-04 |
| CCDC50       | 1.350 | down | 8.38E-06 | 2.53E-04 |
| TSPAN3       | 1.352 | down | 3.62E-10 | 2.59E-07 |
| LINC00926    | 1.352 | down | 4.56E-05 | 8.90E-04 |
| FOLR1        | 1.353 | down | 6.42E-05 | 1.14E-03 |
| SPON1        | 1.354 | down | 4.44E-08 | 5.85E-06 |
| CUX2         | 1.354 | down | 5.55E-07 | 3.56E-05 |
| LRRN3        | 1.354 | down | 1.65E-03 | 1.22E-02 |
| TNFRSF21     | 1.354 | down | 5.07E-08 | 6.29E-06 |
| EPT1         | 1.355 | down | 1.40E-08 | 2.63E-06 |
| FCRLA        | 1.356 | down | 4.70E-05 | 9.10E-04 |
| COL5A3       | 1.356 | down | 2.79E-04 | 3.35E-03 |
| LOC389834    | 1.356 | down | 1.52E-03 | 1.16E-02 |
| RCAN3        | 1.356 | down | 6.31E-07 | 3.92E-05 |
| POU2AF1      | 1.356 | down | 6.09E-07 | 3.81E-05 |
| LINC00342    | 1.358 | down | 4.83E-06 | 1.69E-04 |
| AAK1         | 1.358 | down | 3.63E-09 | 1.05E-06 |
| SRRM2        | 1.359 | down | 2.56E-09 | 8.67E-07 |
| ACAT1        | 1.359 | down | 4.76E-08 | 6.14E-06 |
| LARS         | 1.362 | down | 1.82E-11 | 3.99E-08 |
| BLNK         | 1.368 | down | 1.43E-06 | 7.03E-05 |
| PLEKHG1      | 1.374 | down | 1.15E-05 | 3.22E-04 |
| GATM         | 1.375 | down | 4.05E-05 | 8.14E-04 |
| TCF4         | 1.375 | down | 5.17E-12 | 1.89E-08 |
| UR11         | 1.376 | down | 1.14E-10 | 1.17E-07 |
| LOC100288282 | 1.376 | down | 4.23E-07 | 2.93E-05 |
| CHD1L        | 1.379 | down | 6.65E-10 | 3.73E-07 |
| HNRNPD       | 1.379 | down | 6.14E-10 | 3.65E-07 |
| BCL11A       | 1.382 | down | 5.32E-10 | 3.31E-07 |
| BACH2        | 1.382 | down | 1.20E-07 | 1.15E-05 |
| LOC100190986 | 1.384 | down | 4.17E-08 | 5.58E-06 |
| GPM6B        | 1.385 | down | 7.55E-12 | 2.18E-08 |
| COL4A3       | 1.385 | down | 1.04E-06 | 5.60E-05 |
| LINC01184    | 1.388 | down | 1.96E-09 | 7.58E-07 |
| PDE7A        | 1.388 | down | 1.76E-12 | 1.07E-08 |
| IKZF1        | 1.389 | down | 3.90E-10 | 2.64E-07 |
| IL6ST        | 1.392 | down | 1.83E-09 | 7.33E-07 |
| PRKY         | 1.395 | down | 1.17E-04 | 1.79E-03 |
| MAN1C1       | 1.396 | down | 6.76E-09 | 1.59E-06 |
| USP10        | 1.398 | down | 3.40E-08 | 4.85E-06 |
| MS4A1        | 1.400 | down | 1.90E-06 | 8.60E-05 |
| PLEKHA1      | 1.404 | down | 3.82E-09 | 1.09E-06 |



|           |       |      |          |          |
|-----------|-------|------|----------|----------|
| IGHM      | 1.407 | down | 8.07E-06 | 2.46E-04 |
| RAB11FIP3 | 1.409 | down | 2.19E-11 | 4.29E-08 |
| ZFY       | 1.411 | down | 1.10E-02 | 4.72E-02 |
| STRBP     | 1.415 | down | 9.37E-09 | 1.97E-06 |
| PPM1K     | 1.418 | down | 1.55E-09 | 6.62E-07 |
| THRA1/BTR | 1.425 | down | 9.87E-09 | 2.04E-06 |
| AFF3      | 1.427 | down | 1.76E-06 | 8.16E-05 |
| IGHD      | 1.436 | down | 1.72E-04 | 2.37E-03 |
| TTY10     | 1.449 | down | 1.94E-04 | 2.59E-03 |
| TCL1A     | 1.519 | down | 3.26E-05 | 6.90E-04 |
| NOG       | 1.537 | down | 8.38E-07 | 4.78E-05 |
| TSPAN13   | 1.555 | down | 4.91E-08 | 6.25E-06 |
| UTY       | 1.637 | down | 3.84E-03 | 2.25E-02 |
| EBF1      | 1.675 | down | 3.52E-09 | 1.03E-06 |
| TXLNGY    | 2.055 | down | 3.38E-04 | 3.87E-03 |
| DDX3Y     | 2.142 | down | 6.93E-04 | 6.55E-03 |
| EIF1AY    | 2.310 | down | 2.00E-03 | 1.40E-02 |
| USP9Y     | 2.432 | down | 2.95E-04 | 3.49E-03 |
| KDM5D     | 2.583 | down | 6.61E-04 | 6.34E-03 |
| RPS4Y1    | 2.737 | down | 1.23E-03 | 9.91E-03 |

**Table S5 Summary-based Mendelian Randomization (SMR) analysis of blood gene expression on asthma in discovery phase (FDR < 0.05, p\_HEIDI > 0.01)**

| Source exposure | Gene exposure | Outcome | ID.outcome | topSNP     | A1 | A2 | Freq  | b_SMR  | se_SMR | p_SMR    | FDR_SMR  | p_HEIDI | nsnp_HEIDI |
|-----------------|---------------|---------|------------|------------|----|----|-------|--------|--------|----------|----------|---------|------------|
| eQTLGen         | ADORA3        | Asthma  | UKB        | rs2032006  | C  | T  | 0.442 | -0.064 | 0.017  | 1.22E-04 | 5.45E-03 | 0.265   | 20         |
| eQTLGen         | BACH2         | Asthma  | UKB        | rs72928038 | A  | G  | 0.180 | 0.344  | 0.040  | 3.22E-18 | 7.67E-16 | 0.016   | 20         |
| eQTLGen         | CEP95         | Asthma  | UKB        | rs1991401  | G  | A  | 0.359 | -0.063 | 0.015  | 2.75E-05 | 1.37E-03 | 0.485   | 13         |
| eQTLGen         | ELP2          | Asthma  | UKB        | rs1785930  | G  | A  | 0.376 | -0.036 | 0.010  | 3.21E-04 | 1.09E-02 | 0.034   | 20         |
| eQTLGen         | ETS1          | Asthma  | UKB        | rs55836957 | A  | C  | 0.192 | 0.484  | 0.116  | 2.89E-05 | 1.37E-03 | 0.028   | 10         |
| eQTLGen         | HOXB-AS1      | Asthma  | UKB        | rs7214534  | C  | T  | 0.516 | 0.050  | 0.010  | 2.01E-06 | 1.30E-04 | 0.050   | 20         |
| eQTLGen         | ING5          | Asthma  | UKB        | rs6437282  | C  | G  | 0.371 | -0.082 | 0.016  | 1.32E-07 | 1.05E-05 | 0.113   | 20         |
| eQTLGen         | ITPKB         | Asthma  | UKB        | rs6694031  | A  | G  | 0.463 | -0.194 | 0.057  | 6.93E-04 | 2.25E-02 | 0.114   | 20         |
| eQTLGen         | JAK2          | Asthma  | UKB        | rs6476941  | T  | C  | 0.500 | 0.122  | 0.033  | 2.55E-04 | 9.57E-03 | 0.318   | 20         |
| eQTLGen         | NAP1L4        | Asthma  | UKB        | rs12363575 | G  | A  | 0.207 | 0.102  | 0.031  | 9.96E-04 | 3.09E-02 | 0.157   | 20         |
| eQTLGen         | NFATC3        | Asthma  | UKB        | rs7204192  | G  | A  | 0.150 | -0.146 | 0.038  | 1.34E-04 | 5.64E-03 | 0.052   | 20         |
| eQTLGen         | RBM6          | Asthma  | UKB        | rs2245365  | A  | C  | 0.478 | -0.032 | 0.009  | 2.47E-04 | 9.57E-03 | 0.256   | 20         |
| eQTLGen         | RORC          | Asthma  | UKB        | rs4845604  | A  | G  | 0.135 | -0.404 | 0.084  | 1.69E-06 | 1.20E-04 | 0.407   | 8          |
| eQTLGen         | SLFN5         | Asthma  | UKB        | rs12945522 | C  | A  | 0.401 | -0.038 | 0.012  | 1.08E-03 | 3.21E-02 | 0.904   | 20         |
| eQTLGen         | TGFBR1        | Asthma  | UKB        | rs41283642 | T  | C  | 0.035 | -0.287 | 0.045  | 2.94E-10 | 5.25E-08 | 0.748   | 6          |
| eQTLGen         | TP53I11       | Asthma  | UKB        | rs11604720 | C  | T  | 0.306 | -0.130 | 0.041  | 1.50E-03 | 3.97E-02 | 0.046   | 20         |
| eQTLGen         | ZBTB38        | Asthma  | UKB        | rs1344674  | G  | A  | 0.427 | 0.088  | 0.027  | 1.31E-03 | 3.68E-02 | 0.615   | 20         |

HEIDI: heterogeneity in dependent instruments; nsnp, the number of SNPs.

**Table S6 Two-Sample Mendelian Randomization (TSMR) analysis of blood gene expression on asthma in the discovery phase**

| Source exposure | Gene exposure | OutcomeID.outcome | Method     | n SNP | b      | se    | pval     | FDR      | lo_ci  | up_ci  | or    | or_lci95 | or_uci95 | hetero_pval | ple_pval |
|-----------------|---------------|-------------------|------------|-------|--------|-------|----------|----------|--------|--------|-------|----------|----------|-------------|----------|
| eQTLGen         | BACH2         | Asthma UKB        | IVW        | 2     | 0.345  | 0.035 | 3.29E-23 | 5.59E-22 | 0.277  | 0.413  | 1.412 | 1.319    | 1.511    | 0.959       | -        |
| eQTLGen         | CEP95         | Asthma UKB        | IVW        | 2     | -0.061 | 0.014 | 2.07E-05 | 5.83E-05 | -0.090 | -0.033 | 0.940 | 0.914    | 0.967    | 0.656       | -        |
| eQTLGen         | ELP2          | Asthma UKB        | IVW        | 4     | -0.034 | 0.009 | 3.35E-04 | 6.34E-04 | -0.052 | -0.015 | 0.967 | 0.949    | 0.985    | 0.686       | 0.643    |
| eQTLGen         | ETS1          | Asthma UKB        | IVW        | 2     | 0.463  | 0.079 | 5.22E-09 | 2.96E-08 | 0.308  | 0.618  | 1.589 | 1.360    | 1.856    | 0.731       | -        |
| eQTLGen         | HOXB-AS1      | Asthma UKB        | IVW        | 2     | 0.048  | 0.011 | 2.40E-05 | 5.83E-05 | 0.026  | 0.070  | 1.049 | 1.026    | 1.073    | 0.533       | -        |
| eQTLGen         | ING5          | Asthma UKB        | IVW        | 3     | -0.083 | 0.039 | 3.43E-02 | 4.17E-02 | -0.161 | -0.006 | 0.920 | 0.852    | 0.994    | 0.003       | 0.629    |
| eQTLGen         | ITPKB         | Asthma UKB        | Wald ratio | 1     | -0.194 | 0.056 | 4.92E-04 | 8.37E-04 | -0.303 | -0.085 | 0.824 | 0.738    | 0.919    | -           | -        |
| eQTLGen         | JAK2          | Asthma UKB        | IVW        | 2     | 0.131  | 0.029 | 6.70E-06 | 2.28E-05 | 0.074  | 0.188  | 1.140 | 1.077    | 1.207    | 0.547       | -        |
| eQTLGen         | NFATC3        | Asthma UKB        | IVW        | 2     | -0.131 | 0.032 | 4.93E-05 | 1.05E-04 | -0.195 | -0.068 | 0.877 | 0.823    | 0.934    | 0.450       | -        |
| eQTLGen         | RBM6          | Asthma UKB        | IVW        | 7     | -0.028 | 0.011 | 9.65E-03 | 1.26E-02 | -0.049 | -0.007 | 0.973 | 0.953    | 0.993    | 0.429       | 0.522    |
| eQTLGen         | RORC          | Asthma UKB        | Wald ratio | 1     | -0.404 | 0.075 | 8.58E-08 | 3.65E-07 | -0.552 | -0.256 | 0.668 | 0.576    | 0.774    | -           | -        |
| eQTLGen         | SLFN5         | Asthma UKB        | IVW        | 2     | -0.042 | 0.013 | 1.39E-03 | 1.96E-03 | -0.067 | -0.016 | 0.959 | 0.935    | 0.984    | 0.440       | -        |
| eQTLGen         | TGFBR1        | Asthma UKB        | IVW        | 2     | -0.278 | 0.037 | 7.43E-14 | 6.32E-13 | -0.351 | -0.205 | 0.757 | 0.704    | 0.814    | 0.663       | -        |
| eQTLGen         | ZBTB38        | Asthma UKB        | Wald ratio | 1     | 0.088  | 0.027 | 1.21E-03 | 1.87E-03 | 0.035  | 0.142  | 1.092 | 1.035    | 1.152    | -           | -        |
| eQTLGen         | ADORA3        | Asthma UKB        | IVW        | 3     | -0.032 | 0.025 | 2.05E-01 | 2.05E-01 | -0.082 | 0.018  | 0.968 | 0.922    | 1.018    | 0.950       | 0.810    |
| eQTLGen         | NAP1L4        | Asthma UKB        | IVW        | 2     | 0.081  | 0.041 | 5.00E-02 | 5.67E-02 | 0.000  | 0.163  | 1.085 | 1.000    | 1.177    | 0.132       | -        |
| eQTLGen         | TP53I11       | Asthma UKB        | IVW        | 2     | -0.099 | 0.061 | 1.04E-01 | 1.11E-01 | -0.218 | 0.020  | 0.906 | 0.804    | 1.021    | 0.091       | -        |

nSNP, the number of SNPs; CI, confidence intervals; hetero\_pval, p-value of Cochran Q test assessing heterogeneity of MR analysis; ple\_pval, p-value of MR-Egger regression examining horizontal pleiotropy effect of MR results.

Table S7 SMR analysis of blood gene expression on asthma in replication phase

| Group | Source exposure | Gene exposure | Outcome | ID.outcome | topSNP     | A1 | A2 | b_SM   | se_SM | p_SM     | FDR_SM   | p_HEIDI | nsp_HEIDI | I2    | pval_Q |
|-------|-----------------|---------------|---------|------------|------------|----|----|--------|-------|----------|----------|---------|-----------|-------|--------|
| 1     | Gtex            | CEP95         | Asthma  | TAGC       | rs1991401  | G  | A  | -0.073 | 0.099 | 4.62E-01 | 5.20E-01 | 0.754   | 3         | -     | -      |
| 1     | Gtex            | CEP95         | Asthma  | Finngen    | rs1991401  | G  | A  | -0.172 | 0.065 | 7.98E-03 | 2.82E-02 | 0.955   | 7         | -     | -      |
| 1     | Gtex            | CEP95         | Asthma  | F_T        | -          | -  | -  | -0.142 | 0.054 | 8.75E-03 | 2.84E-02 | -       | -         | 0.000 | 0.401  |
| 1     | Gtex            | ELP2          | Asthma  | TAGC       | rs948416   | G  | A  | -0.037 | 0.044 | 4.03E-01 | 5.20E-01 | 0.839   | 19        | -     | -      |
| 1     | Gtex            | ELP2          | Asthma  | Finngen    | rs1785927  | G  | C  | -0.033 | 0.031 | 2.81E-01 | 3.52E-01 | 0.785   | 20        | -     | -      |
| 1     | Gtex            | ELP2          | Asthma  | F_T        | -          | -  | -  | -0.035 | 0.025 | 1.73E-01 | 2.23E-01 | -       | -         | 0.000 | 0.942  |
| 1     | Gtex            | HOXB-AS1      | Asthma  | TAGC       | rs1042815  | A  | G  | 0.017  | 0.038 | 6.62E-01 | 6.62E-01 | 0.442   | 20        | -     | -      |
| 1     | Gtex            | HOXB-AS1      | Asthma  | Finngen    | rs1042815  | A  | G  | 0.056  | 0.027 | 3.70E-02 | 9.24E-02 | 0.087   | 20        | -     | -      |
| 1     | Gtex            | HOXB-AS1      | Asthma  | F_T        | -          | -  | -  | 0.043  | 0.022 | 4.99E-02 | 8.99E-02 | -       | -         | 0.000 | 0.403  |
| 1     | Gtex            | ITPKB         | Asthma  | TAGC       | rs708778   | T  | C  | -0.193 | 0.138 | 1.62E-01 | 3.64E-01 | 0.045   | 13        | -     | -      |
| 1     | Gtex            | ITPKB         | Asthma  | Finngen    | rs6694031  | A  | G  | -0.180 | 0.095 | 5.98E-02 | 1.20E-01 | 0.243   | 19        | -     | -      |
| 1     | Gtex            | ITPKB         | Asthma  | F_T        | -          | -  | -  | -0.184 | 0.078 | 1.91E-02 | 4.30E-02 | -       | -         | 0.000 | 0.938  |
| 1     | Gtex            | NFATC3        | Asthma  | TAGC       | rs3743733  | C  | T  | -0.095 | 0.088 | 2.75E-01 | 4.96E-01 | 0.019   | 20        | -     | -      |
| 1     | Gtex            | NFATC3        | Asthma  | Finngen    | rs3743733  | C  | T  | 0.044  | 0.057 | 4.43E-01 | 4.43E-01 | 0.073   | 20        | -     | -      |
| 1     | Gtex            | NFATC3        | Asthma  | F_T        | -          | -  | -  | 0.002  | 0.048 | 9.64E-01 | 9.64E-01 | -       | -         | 0.437 | 0.183  |
| 1     | Gtex            | RBM6          | Asthma  | TAGC       | rs7613875  | A  | C  | -0.033 | 0.022 | 1.36E-01 | 3.64E-01 | 0.521   | 20        | -     | -      |
| 1     | Gtex            | RBM6          | Asthma  | Finngen    | rs7613875  | A  | C  | -0.050 | 0.015 | 7.71E-04 | 7.71E-03 | 0.064   | 20        | -     | -      |
| 1     | Gtex            | RBM6          | Asthma  | F_T        | -          | -  | -  | -0.045 | 0.012 | 2.90E-04 | 2.61E-03 | -       | -         | 0.000 | 0.529  |
| 1     | Gtex            | SLFN5         | Asthma  | TAGC       | rs11653987 | C  | T  | -0.032 | 0.041 | 4.40E-01 | 5.20E-01 | 0.383   | 20        | -     | -      |
| 1     | Gtex            | SLFN5         | Asthma  | Finngen    | rs11653987 | C  | T  | -0.077 | 0.029 | 8.47E-03 | 2.82E-02 | 0.547   | 20        | -     | -      |
| 1     | Gtex            | SLFN5         | Asthma  | F_T        | -          | -  | -  | -0.062 | 0.024 | 9.47E-03 | 2.84E-02 | -       | -         | 0.000 | 0.372  |
| 1     | Gtex            | TGFBR1        | Asthma  | TAGC       | rs7034716  | T  | C  | -0.196 | 0.101 | 5.32E-02 | 2.40E-01 | 0.102   | 11        | -     | -      |
| 1     | Gtex            | TGFBR1        | Asthma  | Finngen    | rs7034716  | T  | C  | 0.108  | 0.070 | 1.24E-01 | 2.07E-01 | 0.010   | 17        | -     | -      |
| 1     | Gtex            | TGFBR1        | Asthma  | F_T        | -          | -  | -  | -0.035 | 0.152 | 8.17E-01 | 9.20E-01 | -       | -         | 0.835 | 0.014  |
| 1     | Gtex            | ZBTB38        | Asthma  | TAGC       | rs724016   | G  | A  | 0.212  | 0.083 | 1.08E-02 | 9.69E-02 | 0.102   | 20        | -     | -      |
| 1     | Gtex            | ZBTB38        | Asthma  | Finngen    | rs724016   | G  | A  | 0.051  | 0.055 | 3.52E-01 | 3.91E-01 | 0.925   | 20        | -     | -      |
| 1     | Gtex            | ZBTB38        | Asthma  | F_T        | -          | -  | -  | 0.119  | 0.080 | 1.34E-01 | 2.01E-01 | -       | -         | 0.618 | 0.106  |
| 2     | eQTLGen         | BACH2         | Asthma  | TAGC_2     | rs10944479 | A  | G  | 0.398  | 0.088 | 6.88E-06 | 3.44E-05 | 0.043   | 20        | -     | -      |
| 2     | eQTLGen         | BACH2         | Asthma  | Finngen_2  | rs72928038 | A  | G  | 0.160  | 0.058 | 6.32E-03 | 1.05E-02 | 0.000   | 20        | -     | -      |
| 2     | eQTLGen         | BACH2         | Asthma  | F_T_2      | -          | -  | -  | 0.269  | 0.119 | 2.33E-02 | 2.91E-02 | -       | -         | 0.802 | 0.025  |
| 2     | eQTLGen         | ETS1          | Asthma  | TAGC_2     | rs1940378  | A  | G  | 0.407  | 0.213 | 5.62E-02 | 9.36E-02 | 0.001   | 8         | -     | -      |
| 2     | eQTLGen         | ETS1          | Asthma  | Finngen_2  | rs55836957 | A  | C  | 0.337  | 0.134 | 1.17E-02 | 1.46E-02 | 0.271   | 10        | -     | -      |
| 2     | eQTLGen         | ETS1          | Asthma  | F_T_2      | -          | -  | -  | 0.357  | 0.113 | 1.63E-03 | 4.08E-03 | -       | -         | 0.000 | 0.781  |
| 2     | eQTLGen         | ING5          | Asthma  | TAGC_2     | rs10191556 | T  | C  | -0.182 | 0.061 | 2.89E-03 | 7.21E-03 | 0.477   | 5         | -     | -      |
| 2     | eQTLGen         | ING5          | Asthma  | Finngen_2  | rs6437282  | C  | G  | -0.074 | 0.021 | 5.11E-04 | 2.56E-03 | 0.001   | 20        | -     | -      |
| 2     | eQTLGen         | ING5          | Asthma  | F_T_2      | -          | -  | -  | -0.113 | 0.052 | 3.00E-02 | 3.00E-02 | -       | -         | 0.643 | 0.094  |
| 2     | eQTLGen         | JAK2          | Asthma  | TAGC_2     | rs2149556  | T  | C  | 0.081  | 0.065 | 2.13E-01 | 2.13E-01 | 0.310   | 20        | -     | -      |
| 2     | eQTLGen         | JAK2          | Asthma  | Finngen_2  | rs6476941  | T  | C  | 0.135  | 0.043 | 1.88E-03 | 4.69E-03 | 0.234   | 20        | -     | -      |
| 2     | eQTLGen         | JAK2          | Asthma  | F_T_2      | -          | -  | -  | 0.119  | 0.036 | 1.04E-03 | 4.08E-03 | -       | -         | 0.000 | 0.494  |
| 2     | eQTLGen         | RORC          | Asthma  | TAGC_2     | rs4845604  | A  | G  | -0.208 | 0.148 | 1.60E-01 | 2.00E-01 | 0.239   | 5         | -     | -      |
| 2     | eQTLGen         | RORC          | Asthma  | Finngen_2  | rs11801866 | A  | T  | -0.215 | 0.115 | 6.24E-02 | 6.24E-02 | 0.094   | 7         | -     | -      |
| 2     | eQTLGen         | RORC          | Asthma  | F_T_2      | -          | -  | -  | -0.213 | 0.091 | 1.96E-02 | 2.91E-02 | -       | -         | 0.000 | 0.971  |

HEIDI: heterogeneity in dependent instruments; nsp, the number of SNPs; I2, I2 statistic assessing the heterogeneity of meta-analysis; pval\_Q, p-value of Cochran's Q test of meta-analysis; Finngen, exposure from Gtex and outcome from Finngen; TAGC, exposure from Gtex and outcome from Trans-National Asthma Genetic Consortium (TAGC); F\_T, meta-analysis of results from Gtex→Finngen and Gtex→TAGC; Finngen\_2, exposure from eQTLGen and outcome from Finngen; TAGC\_2, exposure from eQTLGen and outcome from TAGC; F\_T\_2, meta-analysis of results from eQTLGen→Finngen and eQTLGen→TAGC.

**Table S8 TSMR analysis of blood gene expression on asthma in the replication phase**

| Group | Source exposure | Gene exposure | Outcome | ID.outcome | Method     | nsnp | b      | se    | pval     | FDR      | or    | or_lci95 | or_uci95 | hetero_pval | ple_pval | I2    | pval_Q |
|-------|-----------------|---------------|---------|------------|------------|------|--------|-------|----------|----------|-------|----------|----------|-------------|----------|-------|--------|
| 1     | Gtex            | CEP95         | Asthma  | TAGC       | Wald ratio | 1    | -0.073 | 0.098 | 4.60E-01 | 5.18E-01 | 0.930 | 0.767    | 1.127    | -           | -        | -     | -      |
| 1     | Gtex            | CEP95         | Asthma  | Finngen    | Wald ratio | 1    | -0.172 | 0.060 | 4.45E-03 | 2.23E-02 | 0.842 | 0.748    | 0.948    | -           | -        | -     | -      |
| 1     | Gtex            | CEP95         | Asthma  | F_T        | -          | -    | -0.145 | 0.051 | 4.95E-03 | 2.23E-02 | 0.865 | 0.782    | 0.957    | -           | -        | 0.000 | 0.390  |
| 1     | Gtex            | ELP2          | Asthma  | TAGC       | Wald ratio | 1    | -0.037 | 0.044 | 4.02E-01 | 5.18E-01 | 0.963 | 0.883    | 1.051    | -           | -        | -     | -      |
| 1     | Gtex            | ELP2          | Asthma  | Finngen    | Wald ratio | 1    | -0.033 | 0.031 | 2.80E-01 | 3.50E-01 | 0.967 | 0.911    | 1.027    | -           | -        | -     | -      |
| 1     | Gtex            | ELP2          | Asthma  | F_T        | -          | -    | -0.035 | 0.025 | 1.72E-01 | 2.21E-01 | 0.966 | 0.919    | 1.015    | -           | -        | 0.000 | 0.942  |
| 1     | Gtex            | HOXB-AS1      | Asthma  | TAGC       | Wald ratio | 1    | 0.017  | 0.038 | 6.62E-01 | 6.62E-01 | 1.017 | 0.944    | 1.096    | -           | -        | -     | -      |
| 1     | Gtex            | HOXB-AS1      | Asthma  | Finngen    | Wald ratio | 1    | 0.056  | 0.026 | 3.39E-02 | 8.47E-02 | 1.057 | 1.004    | 1.113    | -           | -        | -     | -      |
| 1     | Gtex            | HOXB-AS1      | Asthma  | F_T        | -          | -    | 0.043  | 0.022 | 4.60E-02 | 8.27E-02 | 1.044 | 1.001    | 1.089    | -           | -        | 0.000 | 0.400  |
| 1     | Gtex            | ITPKB         | Asthma  | TAGC       | Wald ratio | 1    | -0.193 | 0.134 | 1.49E-01 | 3.35E-01 | 0.825 | 0.635    | 1.071    | -           | -        | -     | -      |
| 1     | Gtex            | ITPKB         | Asthma  | Finngen    | Wald ratio | 1    | -0.180 | 0.091 | 4.75E-02 | 9.50E-02 | 0.836 | 0.700    | 0.998    | -           | -        | -     | -      |
| 1     | Gtex            | ITPKB         | Asthma  | F_T        | -          | -    | -0.184 | 0.075 | 1.43E-02 | 3.21E-02 | 0.832 | 0.718    | 0.964    | -           | -        | 0.000 | 0.935  |
| 1     | Gtex            | NFATC3        | Asthma  | TAGC       | Wald ratio | 1    | -0.095 | 0.087 | 2.70E-01 | 4.86E-01 | 0.909 | 0.767    | 1.077    | -           | -        | -     | -      |
| 1     | Gtex            | NFATC3        | Asthma  | Finngen    | Wald ratio | 1    | 0.044  | 0.057 | 4.41E-01 | 4.41E-01 | 1.045 | 0.935    | 1.168    | -           | -        | -     | -      |
| 1     | Gtex            | NFATC3        | Asthma  | F_T        | -          | -    | 0.002  | 0.048 | 9.69E-01 | 9.69E-01 | 1.002 | 0.913    | 1.100    | -           | -        | 0.447 | 0.179  |
| 1     | Gtex            | RBM6          | Asthma  | TAGC       | Wald ratio | 1    | -0.033 | 0.022 | 1.36E-01 | 3.35E-01 | 0.967 | 0.926    | 1.010    | -           | -        | -     | -      |
| 1     | Gtex            | RBM6          | Asthma  | Finngen    | Wald ratio | 1    | -0.050 | 0.015 | 6.84E-04 | 6.84E-03 | 0.951 | 0.924    | 0.979    | -           | -        | -     | -      |
| 1     | Gtex            | RBM6          | Asthma  | F_T        | -          | -    | -0.045 | 0.012 | 2.57E-04 | 2.31E-03 | 0.956 | 0.934    | 0.979    | -           | -        | 0.000 | 0.527  |
| 1     | Gtex            | SLFN5         | Asthma  | TAGC       | Wald ratio | 1    | -0.034 | 0.042 | 4.23E-01 | 5.18E-01 | 0.967 | 0.891    | 1.050    | -           | -        | -     | -      |
| 1     | Gtex            | SLFN5         | Asthma  | Finngen    | Wald ratio | 1    | -0.075 | 0.029 | 9.08E-03 | 3.03E-02 | 0.928 | 0.877    | 0.982    | -           | -        | -     | -      |
| 1     | Gtex            | SLFN5         | Asthma  | F_T        | -          | -    | -0.062 | 0.024 | 9.21E-03 | 2.76E-02 | 0.940 | 0.898    | 0.985    | -           | -        | 0.000 | 0.414  |
| 1     | Gtex            | TGFBR1        | Asthma  | TAGC       | Wald ratio | 1    | -0.196 | 0.099 | 4.78E-02 | 2.15E-01 | 0.822 | 0.677    | 0.998    | -           | -        | -     | -      |
| 1     | Gtex            | TGFBR1        | Asthma  | Finngen    | Wald ratio | 1    | 0.108  | 0.069 | 1.19E-01 | 1.98E-01 | 1.114 | 0.973    | 1.276    | -           | -        | -     | -      |
| 1     | Gtex            | TGFBR1        | Asthma  | F_T        | -          | -    | -0.036 | 0.152 | 8.15E-01 | 9.17E-01 | 0.965 | 0.717    | 1.299    | -           | -        | 0.842 | 0.012  |
| 1     | Gtex            | ZBTB38        | Asthma  | TAGC       | Wald ratio | 1    | 0.212  | 0.079 | 7.54E-03 | 6.78E-02 | 1.236 | 1.058    | 1.445    | -           | -        | -     | -      |
| 1     | Gtex            | ZBTB38        | Asthma  | Finngen    | Wald ratio | 1    | 0.051  | 0.054 | 3.49E-01 | 3.88E-01 | 1.052 | 0.946    | 1.171    | -           | -        | -     | -      |
| 1     | Gtex            | ZBTB38        | Asthma  | F_T        | -          | -    | 0.121  | 0.080 | 1.29E-01 | 1.94E-01 | 1.129 | 0.965    | 1.320    | -           | -        | 0.643 | 0.094  |
| 2     | eQTLGen         | BACH2         | Asthma  | TAGC_2     | IVW        | 2    | 0.417  | 0.081 | 3.07E-07 | 1.54E-06 | 1.517 | 1.293    | 1.779    | 0.486       | -        | -     | -      |
| 2     | eQTLGen         | BACH2         | Asthma  | Finngen_2  | IVW        | 2    | 0.127  | 0.104 | 2.24E-01 | 2.79E-01 | 1.135 | 0.926    | 1.392    | 0.060       | -        | -     | -      |
| 2     | eQTLGen         | BACH2         | Asthma  | F_T_2      | -          | -    | 0.279  | 0.145 | 5.43E-02 | 6.79E-02 | 1.322 | 0.995    | 1.756    | -           | -        | 0.793 | 0.028  |
| 2     | eQTLGen         | ETS1          | Asthma  | TAGC_2     | Wald ratio | 1    | 0.407  | 0.207 | 4.96E-02 | 1.24E-01 | 1.502 | 1.001    | 2.254    | -           | -        | -     | -      |
| 2     | eQTLGen         | ETS1          | Asthma  | Finngen_2  | IVW        | 2    | 0.302  | 0.101 | 2.68E-03 | 6.70E-03 | 1.353 | 1.111    | 1.648    | 0.659       | -        | -     | -      |
| 2     | eQTLGen         | ETS1          | Asthma  | F_T_2      | -          | -    | 0.322  | 0.091 | 3.73E-04 | 1.86E-03 | 1.380 | 1.156    | 1.648    | -           | -        | 0.000 | 0.651  |
| 2     | eQTLGen         | ING5          | Asthma  | TAGC_2     | IVW        | 2    | -0.132 | 0.120 | 2.69E-01 | 2.70E-01 | 0.876 | 0.693    | 1.108    | 0.033       | -        | -     | -      |
| 2     | eQTLGen         | ING5          | Asthma  | Finngen_2  | IVW        | 4    | -0.030 | 0.037 | 4.20E-01 | 4.20E-01 | 0.970 | 0.902    | 1.044    | 0.083       | 0.687    | -     | -      |
| 2     | eQTLGen         | ING5          | Asthma  | F_T_2      | -          | -    | -0.039 | 0.036 | 2.72E-01 | 2.72E-01 | 0.962 | 0.897    | 1.031    | -           | -        | 0.000 | 0.414  |
| 2     | eQTLGen         | JAK2          | Asthma  | TAGC_2     | IVW        | 2    | 0.068  | 0.062 | 2.70E-01 | 2.70E-01 | 1.070 | 0.949    | 1.207    | 0.537       | -        | -     | -      |
| 2     | eQTLGen         | JAK2          | Asthma  | Finngen_2  | IVW        | 2    | 0.125  | 0.038 | 1.04E-03 | 5.22E-03 | 1.133 | 1.051    | 1.221    | 0.614       | -        | -     | -      |
| 2     | eQTLGen         | JAK2          | Asthma  | F_T_2      | -          | -    | 0.109  | 0.032 | 7.57E-04 | 1.89E-03 | 1.115 | 1.047    | 1.188    | -           | -        | 0.000 | 0.431  |
| 2     | eQTLGen         | RORC          | Asthma  | TAGC_2     | Wald ratio | 1    | -0.208 | 0.147 | 1.56E-01 | 2.61E-01 | 0.812 | 0.609    | 1.083    | -           | -        | -     | -      |
| 2     | eQTLGen         | RORC          | Asthma  | Finngen_2  | Wald ratio | 1    | -0.215 | 0.113 | 5.68E-02 | 9.47E-02 | 0.806 | 0.646    | 1.006    | -           | -        | -     | -      |
| 2     | eQTLGen         | RORC          | Asthma  | F_T_2      | -          | -    | -0.213 | 0.090 | 1.76E-02 | 2.93E-02 | 0.808 | 0.678    | 0.964    | -           | -        | 0.000 | 0.970  |

nsnp, the number of SNPs; CI, confidence intervals; hetero\_pval, p-value of Cochrane Q test assessing heterogeneity of MR analysis; ple\_pval, p-value of MR-Egger regression examining horizontal pleiotropy effect of MR results; I2, I2 statistic assessing the heterogeneity of meta-analysis; pval\_Q, p-value of Cochran's Q test of meta-analysis; Finngen, exposure from Gtex and outcome from Finngen; TAGC, exposure from Gtex and outcome from Trans-National Asthma Genetic Consortium (TAGC); F\_T, meta-analysis of results from Gtex→Finngen and Gtex→TAGC; Finngen\_2, exposure from eQTLGen and outcome from Finngen; TAGC\_2, exposure from eQTLGen and outcome from TAGC; F\_T\_2, meta-analysis of results from eQTLGen→Finngen and eQTLGen→TAGC.

**Table S9 Colocalization analysis between gene expression from eQTLGen and asthma from UKB**

| Source exposure | Gene exposure | Outcome | ID.outcome | p1       | p2       | p12      | PP.H0.abf | PP.H1.abf | PP.H2.abf | PP.H3.abf | PP.H4.abf |
|-----------------|---------------|---------|------------|----------|----------|----------|-----------|-----------|-----------|-----------|-----------|
| eQTLGen         | ETS1          | Asthma  | UKB        | 1.00E-04 | 1.00E-04 | 1.00E-05 | 0.000     | 0.003     | 0.000     | 0.017     | 0.980     |
| eQTLGen         | CEP95         | Asthma  | UKB        | 1.00E-04 | 1.00E-04 | 1.00E-05 | 0.000     | 0.035     | 0.000     | 0.002     | 0.963     |
| eQTLGen         | HOXB-AS1      | Asthma  | UKB        | 1.00E-04 | 1.00E-04 | 1.00E-05 | 0.000     | 0.003     | 0.000     | 0.049     | 0.948     |
| eQTLGen         | RBM6          | Asthma  | UKB        | 1.00E-04 | 1.00E-04 | 1.00E-05 | 0.000     | 0.248     | 0.000     | 0.082     | 0.670     |
| eQTLGen         | ITPKB         | Asthma  | UKB        | 1.00E-04 | 1.00E-04 | 1.00E-05 | 0.000     | 0.304     | 0.000     | 0.033     | 0.664     |
| eQTLGen         | JAK2          | Asthma  | UKB        | 1.00E-04 | 1.00E-04 | 1.00E-05 | 0.000     | 0.188     | 0.000     | 0.240     | 0.571     |
| eQTLGen         | SLFN5         | Asthma  | UKB        | 1.00E-04 | 1.00E-04 | 1.00E-05 | 0.000     | 0.560     | 0.000     | 0.047     | 0.393     |
| eQTLGen         | BACH2         | Asthma  | UKB        | 1.00E-04 | 1.00E-04 | 1.00E-05 | 0.000     | 0.000     | 0.000     | 0.956     | 0.044     |
| eQTLGen         | RORC          | Asthma  | UKB        | 1.00E-04 | 1.00E-04 | 1.00E-05 | 0.000     | 0.000     | 0.000     | 1.000     | 0.000     |

p1, a prior probability for a SNP being associated with trait 1 only; p2, a prior probability for a SNP being associated with trait 2 only; p12, a prior probability for a SNP being associated with both traits.

**Table S10 SMR analysis of blood DNA methylation on asthma in discovery phase (FDR < 0.05, p\_HEIDI > 0.01)**

| Source exposure | Gene exposure | ID.exposure | Outcome | ID.outcome | topSNP     | A1 | A2 | Freq  | b_SMR  | se_SMR | p_SMR    | FDR_SMR  | p_HEIDI | nsnp_HEIDI |
|-----------------|---------------|-------------|---------|------------|------------|----|----|-------|--------|--------|----------|----------|---------|------------|
| GoDMC           | ITPKB         | cg04213163  | Asthma  | UKB        | rs708772   | C  | T  | 0.417 | -0.031 | 0.010  | 1.28E-03 | 7.44E-03 | 0.114   | 20         |
| GoDMC           | ITPKB         | cg16265553  | Asthma  | UKB        | rs835665   | A  | G  | 0.235 | 0.251  | 0.069  | 2.88E-04 | 3.87E-03 | 0.276   | 5          |
| GoDMC           | ITPKB         | cg05306109  | Asthma  | UKB        | rs708772   | C  | T  | 0.417 | 0.188  | 0.060  | 1.77E-03 | 7.88E-03 | 0.057   | 7          |
| GoDMC           | ITPKB         | cg23717186  | Asthma  | UKB        | rs3768410  | T  | C  | 0.426 | 0.136  | 0.034  | 5.42E-05 | 1.75E-03 | 0.127   | 16         |
| GoDMC           | RBM6          | cg12257692  | Asthma  | UKB        | rs6793528  | C  | A  | 0.446 | 0.030  | 0.010  | 2.92E-03 | 1.10E-02 | 0.013   | 20         |
| GoDMC           | RBM6          | cg05635617  | Asthma  | UKB        | rs2624822  | T  | C  | 0.446 | 0.048  | 0.016  | 2.90E-03 | 1.10E-02 | 0.015   | 20         |
| GoDMC           | RBM6          | cg21729847  | Asthma  | UKB        | rs6793528  | C  | A  | 0.446 | 0.072  | 0.024  | 3.02E-03 | 1.10E-02 | 0.026   | 20         |
| GoDMC           | JAK2          | cg20394284  | Asthma  | UKB        | rs10758669 | C  | A  | 0.353 | 0.043  | 0.011  | 9.05E-05 | 1.75E-03 | 0.247   | 20         |
| GoDMC           | JAK2          | cg02405213  | Asthma  | UKB        | rs7851556  | T  | C  | 0.273 | -0.026 | 0.007  | 6.75E-05 | 1.75E-03 | 0.856   | 20         |
| GoDMC           | JAK2          | cg13661497  | Asthma  | UKB        | rs10491650 | C  | T  | 0.289 | -0.323 | 0.102  | 1.58E-03 | 7.62E-03 | 0.152   | 9          |
| GoDMC           | ETS1          | cg11760500  | Asthma  | UKB        | rs11221335 | C  | T  | 0.245 | -0.059 | 0.018  | 8.65E-04 | 6.27E-03 | 0.165   | 20         |
| GoDMC           | ETS1          | cg14998713  | Asthma  | UKB        | rs61907765 | T  | C  | 0.237 | 0.175  | 0.054  | 1.28E-03 | 7.44E-03 | 0.342   | 12         |
| GoDMC           | ETS1          | cg09915500  | Asthma  | UKB        | rs11221342 | C  | T  | 0.167 | -0.115 | 0.045  | 1.12E-02 | 3.37E-02 | 0.129   | 10         |
| GoDMC           | ETS1          | cg23774988  | Asthma  | UKB        | rs4396302  | A  | G  | 0.428 | -0.166 | 0.047  | 3.65E-04 | 3.87E-03 | 0.254   | 20         |
| GoDMC           | ETS1          | cg01900413  | Asthma  | UKB        | rs11221342 | C  | T  | 0.167 | -0.135 | 0.054  | 1.15E-02 | 3.37E-02 | 0.147   | 8          |
| GoDMC           | ETS1          | cg14718848  | Asthma  | UKB        | rs4245079  | A  | C  | 0.433 | 0.023  | 0.007  | 4.32E-04 | 3.87E-03 | 0.182   | 20         |
| GoDMC           | ETS1          | cg08458745  | Asthma  | UKB        | rs4245079  | A  | C  | 0.433 | -0.087 | 0.025  | 4.67E-04 | 3.87E-03 | 0.250   | 20         |

HEIDI: heterogeneity in dependent instruments; nsnp, the number of SNPs.

Table S11 TSMR analysis of blood DNA methylation on asthma in discovery phase

| Source exposure | Gene exposure | ID.exposure | Outcome | ID.outcome | Method     | nsnp | b      | se    | pval     | FDR      | or    | or_uci95 | or_uci95 | hetero_pval | ple_pval |
|-----------------|---------------|-------------|---------|------------|------------|------|--------|-------|----------|----------|-------|----------|----------|-------------|----------|
| GoDMC           | ETS1          | cg08458745  | Asthma  | UKB        | Wald ratio | 1    | -0.087 | 0.025 | 4.30E-04 | 2.39E-03 | 0.916 | 0.873    | 0.962    | -           | -        |
| GoDMC           | ETS1          | cg14998713  | Asthma  | UKB        | Wald ratio | 1    | 0.175  | 0.053 | 9.55E-04 | 2.70E-03 | 1.191 | 1.074    | 1.321    | -           | -        |
| GoDMC           | ETS1          | cg23774988  | Asthma  | UKB        | Wald ratio | 1    | -0.471 | 0.145 | 1.15E-03 | 2.80E-03 | 0.624 | 0.470    | 0.829    | -           | -        |
| GoDMC           | ETS1          | cg14718848  | Asthma  | UKB        | IVW        | 3    | 0.019  | 0.007 | 7.75E-03 | 1.20E-02 | 1.019 | 1.005    | 1.033    | 0.740       | 0.624    |
| GoDMC           | ETS1          | cg09915500  | Asthma  | UKB        | Wald ratio | 1    | -0.115 | 0.045 | 1.03E-02 | 1.34E-02 | 0.891 | 0.817    | 0.973    | -           | -        |
| GoDMC           | ETS1          | cg01900413  | Asthma  | UKB        | Wald ratio | 1    | -0.135 | 0.053 | 1.03E-02 | 1.34E-02 | 0.873 | 0.788    | 0.969    | -           | -        |
| GoDMC           | ETS1          | cg11760500  | Asthma  | UKB        | Wald ratio | 1    | -0.041 | 0.021 | 4.81E-02 | 5.11E-02 | 0.960 | 0.922    | 1.000    | -           | -        |
| GoDMC           | ITPKB         | cg23717186  | Asthma  | UKB        | Wald ratio | 1    | 0.136  | 0.033 | 3.98E-05 | 6.77E-04 | 1.146 | 1.074    | 1.223    | -           | -        |
| GoDMC           | ITPKB         | cg16265553  | Asthma  | UKB        | Wald ratio | 1    | 0.251  | 0.066 | 1.35E-04 | 1.15E-03 | 1.286 | 1.130    | 1.463    | -           | -        |
| GoDMC           | ITPKB         | cg05306109  | Asthma  | UKB        | Wald ratio | 1    | 0.214  | 0.063 | 7.02E-04 | 2.39E-03 | 1.238 | 1.094    | 1.401    | -           | -        |
| GoDMC           | ITPKB         | cg04213163  | Asthma  | UKB        | IVW        | 4    | -0.012 | 0.016 | 4.59E-01 | 4.59E-01 | 0.988 | 0.958    | 1.020    | 0.288       | 0.257    |
| GoDMC           | JAK2          | cg13661497  | Asthma  | UKB        | Wald ratio | 1    | -0.323 | 0.094 | 5.86E-04 | 2.39E-03 | 0.724 | 0.602    | 0.870    | -           | -        |
| GoDMC           | JAK2          | cg20394284  | Asthma  | UKB        | IVW        | 2    | 0.045  | 0.015 | 2.28E-03 | 4.85E-03 | 1.046 | 1.016    | 1.077    | 0.276       | -        |
| GoDMC           | JAK2          | cg02405213  | Asthma  | UKB        | IVW        | 3    | -0.025 | 0.010 | 1.60E-02 | 1.94E-02 | 0.975 | 0.956    | 0.995    | 0.107       | 0.854    |
| GoDMC           | RBM6          | cg05635617  | Asthma  | UKB        | Wald ratio | 1    | 0.049  | 0.016 | 2.62E-03 | 4.94E-03 | 1.051 | 1.017    | 1.085    | -           | -        |
| GoDMC           | RBM6          | cg12257692  | Asthma  | UKB        | Wald ratio | 1    | 0.030  | 0.010 | 2.99E-03 | 5.09E-03 | 1.030 | 1.010    | 1.051    | -           | -        |
| GoDMC           | RBM6          | cg21729847  | Asthma  | UKB        | IVW        | 2    | 0.083  | 0.040 | 3.93E-02 | 4.45E-02 | 1.087 | 1.004    | 1.177    | 0.725       | -        |

nsnp, the number of SNPs; CI, confidence intervals; hetero\_pval, p-value of Cochran Q test assessing heterogeneity of MR analysis; ple\_pval, p-value of MR-Egger regression examining horizontal pleiotropy effect of MR results.



Table S12 SMR analysis of blood DNA methylation on asthma in replication phase

| Group | Source exposure | Gene exposur | ID.exposure | Outcome | ID.outcome | topSNP     | A1 | A2 | b_SMR  | se_SMR | p_SMR    | FDR_SMR  | p_HEIDI | nsnp_HEIDI | I2    | pval_Q |
|-------|-----------------|--------------|-------------|---------|------------|------------|----|----|--------|--------|----------|----------|---------|------------|-------|--------|
| 1     | FSH             | ETS1         | cg01900413  | Asthma  | TAGC       | rs11221342 | T  | C  | -7.470 | 3.978  | 6.04E-02 | 2.21E-01 | 0.678   | 6          | -     | -      |
| 1     | FSH             | ETS1         | cg01900413  | Asthma  | Finngen    | rs4396302  | A  | G  | -5.504 | 2.214  | 1.29E-02 | 2.15E-02 | 0.554   | 10         | -     | -      |
| 1     | FSH             | ETS1         | cg01900413  | Asthma  | F_T        | -          | -  | -  | -5.969 | 1.934  | 2.03E-03 | 7.08E-03 | -       | -          | 0.000 | 0.666  |
| 1     | FSH             | ETS1         | cg08458745  | Asthma  | TAGC       | rs4245079  | A  | C  | -3.315 | 2.231  | 1.37E-01 | 2.52E-01 | 0.252   | 12         | -     | -      |
| 1     | FSH             | ETS1         | cg08458745  | Asthma  | Finngen    | rs4262739  | A  | G  | -3.404 | 1.503  | 2.35E-02 | 2.57E-02 | 0.898   | 17         | -     | -      |
| 1     | FSH             | ETS1         | cg08458745  | Asthma  | F_T        | -          | -  | -  | -3.376 | 1.247  | 6.76E-03 | 1.07E-02 | -       | -          | 0.000 | 0.974  |
| 1     | FSH             | ETS1         | cg09915500  | Asthma  | TAGC       | rs11221342 | T  | C  | -8.598 | 4.558  | 5.92E-02 | 2.21E-01 | 0.793   | 4          | -     | -      |
| 1     | FSH             | ETS1         | cg09915500  | Asthma  | Finngen    | rs56075344 | G  | A  | -1.924 | 2.668  | 4.71E-01 | 4.71E-01 | 0.064   | 5          | -     | -      |
| 1     | FSH             | ETS1         | cg09915500  | Asthma  | F_T        | -          | -  | -  | -3.627 | 2.302  | 1.15E-01 | 1.15E-01 | -       | -          | 0.374 | 0.206  |
| 1     | FSH             | ETS1         | cg14718848  | Asthma  | TAGC       | rs4245079  | A  | C  | 0.310  | 0.207  | 1.35E-01 | 2.52E-01 | 0.120   | 20         | -     | -      |
| 1     | FSH             | ETS1         | cg14718848  | Asthma  | Finngen    | rs4262739  | A  | G  | 0.319  | 0.139  | 2.16E-02 | 2.57E-02 | 0.910   | 20         | -     | -      |
| 1     | FSH             | ETS1         | cg14718848  | Asthma  | F_T        | -          | -  | -  | 0.316  | 0.116  | 6.15E-03 | 1.07E-02 | -       | -          | 0.000 | 0.970  |
| 1     | FSH             | ETS1         | cg23774988  | Asthma  | TAGC       | rs4128561  | C  | T  | -2.911 | 1.726  | 9.16E-02 | 2.52E-01 | 0.548   | 5          | -     | -      |
| 1     | FSH             | ETS1         | cg23774988  | Asthma  | Finngen    | rs4396302  | A  | G  | -2.822 | 1.130  | 1.25E-02 | 2.15E-02 | 0.758   | 9          | -     | -      |
| 1     | FSH             | ETS1         | cg23774988  | Asthma  | F_T        | -          | -  | -  | -2.849 | 0.945  | 2.58E-03 | 7.08E-03 | -       | -          | 0.000 | 0.966  |
| 1     | FSH             | ITPKB        | cg23717186  | Asthma  | TAGC       | rs3768414  | G  | A  | 2.826  | 2.395  | 2.38E-01 | 3.27E-01 | 0.320   | 5          | -     | -      |
| 1     | FSH             | ITPKB        | cg23717186  | Asthma  | Finngen    | rs3768410  | C  | T  | 3.588  | 1.465  | 1.43E-02 | 2.15E-02 | 0.918   | 8          | -     | -      |
| 1     | FSH             | ITPKB        | cg23717186  | Asthma  | F_T        | -          | -  | -  | 3.381  | 1.250  | 6.83E-03 | 1.07E-02 | -       | -          | 0.000 | 0.786  |
| 1     | FSH             | JAK2         | cg02405213  | Asthma  | TAGC       | rs10974922 | C  | T  | -0.140 | 0.106  | 1.88E-01 | 2.95E-01 | 0.093   | 20         | -     | -      |
| 1     | FSH             | JAK2         | cg02405213  | Asthma  | Finngen    | rs57299248 | C  | G  | -0.222 | 0.071  | 1.71E-03 | 5.13E-03 | 0.002   | 20         | -     | -      |
| 1     | FSH             | JAK2         | cg02405213  | Asthma  | F_T        | -          | -  | -  | -0.196 | 0.059  | 8.36E-04 | 4.60E-03 | -       | -          | 0.000 | 0.521  |
| 1     | FSH             | JAK2         | cg20394284  | Asthma  | TAGC       | rs10758669 | A  | C  | 0.828  | 0.419  | 4.82E-02 | 2.21E-01 | 0.383   | 20         | -     | -      |
| 1     | FSH             | JAK2         | cg20394284  | Asthma  | Finngen    | rs1887428  | C  | G  | 0.744  | 0.267  | 5.28E-03 | 1.27E-02 | 0.295   | 20         | -     | -      |
| 1     | FSH             | JAK2         | cg20394284  | Asthma  | F_T        | -          | -  | -  | 0.768  | 0.225  | 6.40E-04 | 4.60E-03 | -       | -          | 0.000 | 0.866  |
| 1     | FSH             | RBM6         | cg05635617  | Asthma  | TAGC       | rs2624819  | G  | T  | 0.985  | 1.835  | 5.92E-01 | 6.15E-01 | 0.161   | 20         | -     | -      |
| 1     | FSH             | RBM6         | cg05635617  | Asthma  | Finngen    | rs2624819  | G  | T  | 4.669  | 1.308  | 3.56E-04 | 2.14E-03 | 0.134   | 20         | -     | -      |
| 1     | FSH             | RBM6         | cg05635617  | Asthma  | F_T        | -          | -  | -  | 3.052  | 1.828  | 9.51E-02 | 1.10E-01 | -       | -          | 0.626 | 0.102  |
| 1     | FSH             | RBM6         | cg12257692  | Asthma  | TAGC       | rs17657664 | T  | G  | 0.385  | 0.765  | 6.15E-01 | 6.15E-01 | 0.160   | 20         | -     | -      |
| 1     | FSH             | RBM6         | cg12257692  | Asthma  | Finngen    | rs13079006 | G  | T  | 1.913  | 0.532  | 3.20E-04 | 2.14E-03 | 0.177   | 20         | -     | -      |
| 1     | FSH             | RBM6         | cg12257692  | Asthma  | F_T        | -          | -  | -  | 1.248  | 0.758  | 9.96E-02 | 1.10E-01 | -       | -          | 0.629 | 0.101  |
| 1     | FSH             | RBM6         | cg21729847  | Asthma  | TAGC       | rs2624822  | C  | T  | 2.023  | 3.929  | 6.07E-01 | 6.15E-01 | 0.184   | 20         | -     | -      |
| 1     | FSH             | RBM6         | cg21729847  | Asthma  | Finngen    | rs2526749  | G  | A  | 9.722  | 2.811  | 5.44E-04 | 2.18E-03 | 0.252   | 20         | -     | -      |
| 1     | FSH             | RBM6         | cg21729847  | Asthma  | F_T        | -          | -  | -  | 6.362  | 3.818  | 9.57E-02 | 1.10E-01 | -       | -          | 0.606 | 0.111  |
| 2     | GoDMC           | ETS1         | cg14998713  | Asthma  | TAGC_2     | rs11221332 | T  | C  | 0.249  | 0.105  | 1.78E-02 | 3.16E-02 | 0.614   | 10         | -     | -      |
| 2     | GoDMC           | ETS1         | cg14998713  | Asthma  | Finngen_2  | rs61907765 | T  | C  | 0.100  | 0.068  | 1.38E-01 | 1.38E-01 | 0.065   | 12         | -     | -      |
| 2     | GoDMC           | ETS1         | cg14998713  | Asthma  | F_T_2      | -          | -  | -  | 0.144  | 0.057  | 1.14E-02 | 1.52E-02 | -       | -          | 0.293 | 0.234  |
| 2     | GoDMC           | ITPKB        | cg05306109  | Asthma  | TAGC_2     | rs708772   | C  | T  | 0.256  | 0.113  | 2.37E-02 | 3.16E-02 | 0.076   | 4          | -     | -      |
| 2     | GoDMC           | ITPKB        | cg05306109  | Asthma  | Finngen_2  | rs708772   | C  | T  | 0.129  | 0.080  | 1.08E-01 | 1.38E-01 | 0.607   | 7          | -     | -      |
| 2     | GoDMC           | ITPKB        | cg05306109  | Asthma  | F_T_2      | -          | -  | -  | 0.172  | 0.066  | 8.81E-03 | 1.52E-02 | -       | -          | 0.000 | 0.361  |
| 2     | GoDMC           | ITPKB        | cg16265553  | Asthma  | TAGC_2     | rs835673   | T  | C  | 0.304  | 0.129  | 1.82E-02 | 3.16E-02 | 0.831   | 3          | -     | -      |
| 2     | GoDMC           | ITPKB        | cg16265553  | Asthma  | Finngen_2  | rs835665   | A  | G  | 0.154  | 0.091  | 8.92E-02 | 1.38E-01 | 0.411   | 5          | -     | -      |
| 2     | GoDMC           | ITPKB        | cg16265553  | Asthma  | F_T_2      | -          | -  | -  | 0.204  | 0.074  | 5.96E-03 | 1.52E-02 | -       | -          | 0.000 | 0.341  |
| 2     | GoDMC           | JAK2         | cg13661497  | Asthma  | TAGC_2     | rs10491650 | C  | T  | -0.059 | 0.178  | 7.42E-01 | 7.42E-01 | 0.034   | 8          | -     | -      |
| 2     | GoDMC           | JAK2         | cg13661497  | Asthma  | Finngen_2  | rs10491650 | C  | T  | -0.208 | 0.117  | 7.70E-02 | 1.38E-01 | 0.005   | 9          | -     | -      |
| 2     | GoDMC           | JAK2         | cg13661497  | Asthma  | F_T_2      | -          | -  | -  | -0.162 | 0.098  | 9.75E-02 | 9.75E-02 | -       | -          | 0.000 | 0.484  |
| 3     | GoDMC           | ETS1         | cg08458745  | Asthma  | TAGC_2     | rs4245079  | A  | C  | -0.072 | 0.049  | 1.35E-01 | 2.03E-01 | 0.048   | 16         | -     | -      |
| 3     | GoDMC           | ETS1         | cg08458745  | Asthma  | Finngen_2  | rs4245079  | A  | C  | -0.075 | 0.033  | 2.14E-02 | 2.14E-02 | 0.797   | 20         | -     | -      |
| 3     | GoDMC           | ETS1         | cg08458745  | Asthma  | F_T_2      | -          | -  | -  | -0.074 | 0.027  | 6.08E-03 | 6.08E-03 | -       | -          | 0.000 | 0.967  |
| 3     | GoDMC           | ETS1         | cg14718848  | Asthma  | TAGC_2     | rs4245079  | A  | C  | 0.019  | 0.013  | 1.35E-01 | 2.03E-01 | 0.109   | 20         | -     | -      |
| 3     | GoDMC           | ETS1         | cg14718848  | Asthma  | Finngen_2  | rs4245079  | A  | C  | 0.020  | 0.009  | 2.10E-02 | 2.14E-02 | 0.902   | 20         | -     | -      |
| 3     | GoDMC           | ETS1         | cg14718848  | Asthma  | F_T_2      | -          | -  | -  | 0.019  | 0.007  | 5.98E-03 | 6.08E-03 | -       | -          | 0.000 | 0.967  |
| 3     | GoDMC           | ETS1         | cg23774988  | Asthma  | TAGC_2     | rs4128561  | C  | T  | -0.165 | 0.097  | 8.86E-02 | 2.03E-01 | 0.244   | 14         | -     | -      |
| 3     | GoDMC           | ETS1         | cg23774988  | Asthma  | Finngen_2  | rs4396302  | A  | G  | -0.154 | 0.060  | 1.07E-02 | 1.89E-02 | 0.744   | 20         | -     | -      |
| 3     | GoDMC           | ETS1         | cg23774988  | Asthma  | F_T_2      | -          | -  | -  | -0.157 | 0.051  | 2.17E-03 | 4.33E-03 | -       | -          | 0.000 | 0.922  |
| 3     | GoDMC           | ITPKB        | cg23717186  | Asthma  | TAGC_2     | rs3768414  | A  | G  | 0.084  | 0.071  | 2.35E-01 | 2.35E-01 | 0.180   | 10         | -     | -      |
| 3     | GoDMC           | ITPKB        | cg23717186  | Asthma  | Finngen_2  | rs3768410  | T  | C  | 0.111  | 0.044  | 1.26E-02 | 1.89E-02 | 0.815   | 16         | -     | -      |

|   |       |       |            |        |           |            |   |   |        |       |          |          |       |    |       |       |
|---|-------|-------|------------|--------|-----------|------------|---|---|--------|-------|----------|----------|-------|----|-------|-------|
| 3 | GoDMC | ITPKB | cg23717186 | Asthma | F_T_2     | -          | - | - | 0.103  | 0.038 | 6.06E-03 | 6.08E-03 | -     | -  | 0.000 | 0.751 |
| 3 | GoDMC | JAK2  | cg02405213 | Asthma | TAGC_2    | rs7851556  | T | C | -0.016 | 0.013 | 1.93E-01 | 2.31E-01 | 0.123 | 20 | -     | -     |
| 3 | GoDMC | JAK2  | cg02405213 | Asthma | Finngen_2 | rs7851556  | T | C | -0.023 | 0.008 | 3.97E-03 | 1.89E-02 | 0.005 | 20 | -     | -     |
| 3 | GoDMC | JAK2  | cg02405213 | Asthma | F_T_2     | -          | - | - | -0.021 | 0.007 | 1.76E-03 | 4.33E-03 | -     | -  | 0.000 | 0.645 |
| 3 | GoDMC | JAK2  | cg20394284 | Asthma | TAGC_2    | rs10758669 | C | A | 0.043  | 0.022 | 4.78E-02 | 2.03E-01 | 0.550 | 20 | -     | -     |
| 3 | GoDMC | JAK2  | cg20394284 | Asthma | Finngen_2 | rs10758669 | C | A | 0.036  | 0.014 | 1.19E-02 | 1.89E-02 | 0.426 | 20 | -     | -     |
| 3 | GoDMC | JAK2  | cg20394284 | Asthma | F_T_2     | -          | - | - | 0.038  | 0.012 | 1.41E-03 | 4.33E-03 | -     | -  | 0.000 | 0.807 |

HEIDI: heterogeneity in dependent instruments; nsp, the number of SNPs; I2, I2 statistic assessing the heterogeneity of meta-analysis; pval\_Q, p-value of Cochran's Q test of meta-analysis; Finngen, exposure from FSH and outcome from Finngen; TAGC, exposure from FSH and outcome from Trans-National Asthma Genetic Consortium (TAGC); F\_T, meta-analysis of results from FSH→Finngen and FSH→TAGC; Finngen\_2, exposure from GoDMC and outcome from Finngen; TAGC, exposure from GoDMC and outcome from TAGC; F\_T\_2, meta-analysis of results from GoDMC→Finngen and GoDMC→TAGC.

Table S13 TSMR analysis of blood DNA methylation on asthma in replication phase

| Group | Source exposure | Gene exposure | ID.exposure | Outcome | ID.outcome | Method     | nsp | b      | se    | pval     | FDR      | or        | or_lci95 | or_uci95    | hetero_pval | ple_pval | I2    | pval_Q |
|-------|-----------------|---------------|-------------|---------|------------|------------|-----|--------|-------|----------|----------|-----------|----------|-------------|-------------|----------|-------|--------|
| 1     | FSH             | ETS1          | cg01900413  | Asthma  | TAGC       | Wald ratic | 1   | -7.470 | 3.889 | 5.48E-02 | 1.51E-01 | 0.001     | 0.000    | 1.166       | -           | -        | -     | -      |
| 1     | FSH             | ETS1          | cg01900413  | Asthma  | Finngen    | Wald ratic | 1   | -5.504 | 2.132 | 9.82E-03 | 1.54E-02 | 0.004     | 0.000    | 0.266       | -           | -        | -     | -      |
| 1     | FSH             | ETS1          | cg01900413  | Asthma  | F_T        | -          | -   | -5.958 | 1.869 | 1.44E-03 | 4.87E-03 | 0.003     | 0.000    | 0.101       | -           | -        | 0.000 | 0.658  |
| 1     | FSH             | ETS1          | cg08458745  | Asthma  | TAGC       | Wald ratic | 1   | -3.315 | 2.218 | 1.35E-01 | 2.27E-01 | 0.036     | 0.000    | 2.806       | -           | -        | -     | -      |
| 1     | FSH             | ETS1          | cg08458745  | Asthma  | Finngen    | Wald ratic | 1   | -3.404 | 1.482 | 2.16E-02 | 2.37E-02 | 0.033     | 0.002    | 0.606       | -           | -        | -     | -      |
| 1     | FSH             | ETS1          | cg08458745  | Asthma  | F_T        | -          | -   | -3.377 | 1.232 | 6.13E-03 | 9.63E-03 | 0.034     | 0.003    | 0.382       | -           | -        | 0.000 | 0.973  |
| 1     | FSH             | ETS1          | cg09915500  | Asthma  | TAGC       | Wald ratic | 1   | -8.598 | 4.477 | 5.48E-02 | 1.51E-01 | 0.000     | 0.000    | 1.193       | -           | -        | -     | -      |
| 1     | FSH             | ETS1          | cg09915500  | Asthma  | Finngen    | Wald ratic | 1   | -1.924 | 2.661 | 4.70E-01 | 4.70E-01 | 0.146     | 0.001    | 26.881      | -           | -        | -     | -      |
| 1     | FSH             | ETS1          | cg09915500  | Asthma  | F_T        | -          | -   | -3.667 | 2.288 | 1.09E-01 | 1.20E-01 | 0.026     | 0.000    | 2.263       | -           | -        | 0.391 | 0.200  |
| 1     | FSH             | ETS1          | cg14718848  | Asthma  | TAGC       | Wald ratic | 1   | 0.548  | 0.269 | 4.17E-02 | 1.51E-01 | 1.729     | 1.021    | 2.928       | -           | -        | -     | -      |
| 1     | FSH             | ETS1          | cg14718848  | Asthma  | Finngen    | IVW        | 3   | 0.372  | 0.158 | 1.87E-02 | 2.28E-02 | 1.451     | 1.064    | 1.978       | 0.274       | 0.355    | -     | -      |
| 1     | FSH             | ETS1          | cg14718848  | Asthma  | F_T        | -          | -   | 0.417  | 0.136 | 2.21E-03 | 4.87E-03 | 1.518     | 1.162    | 1.982       | -           | -        | 0.000 | 0.573  |
| 1     | FSH             | ETS1          | cg23774988  | Asthma  | TAGC       | Wald ratic | 1   | -2.911 | 1.699 | 8.67E-02 | 1.91E-01 | 0.054     | 0.002    | 1.521       | -           | -        | -     | -      |
| 1     | FSH             | ETS1          | cg23774988  | Asthma  | Finngen    | Wald ratic | 1   | -2.822 | 1.093 | 9.82E-03 | 1.54E-02 | 0.059     | 0.007    | 0.507       | -           | -        | -     | -      |
| 1     | FSH             | ETS1          | cg23774988  | Asthma  | F_T        | -          | -   | -2.848 | 0.919 | 1.95E-03 | 4.87E-03 | 0.058     | 0.010    | 0.351       | -           | -        | 0.000 | 0.965  |
| 1     | FSH             | ITPKB         | cg23717186  | Asthma  | TAGC       | Wald ratic | 1   | 2.826  | 2.377 | 2.35E-01 | 3.23E-01 | 16.874    | 0.160    | 1781.955    | -           | -        | -     | -      |
| 1     | FSH             | ITPKB         | cg23717186  | Asthma  | Finngen    | Wald ratic | 1   | 3.588  | 1.428 | 1.20E-02 | 1.65E-02 | 36.169    | 2.200    | 594.665     | -           | -        | -     | -      |
| 1     | FSH             | ITPKB         | cg23717186  | Asthma  | F_T        | -          | -   | 3.386  | 1.224 | 5.69E-03 | 9.63E-03 | 29.546    | 2.681    | 325.648     | -           | -        | 0.000 | 0.783  |
| 1     | FSH             | JAK2          | cg02405213  | Asthma  | TAGC       | IVW        | 2   | -0.268 | 0.184 | 1.45E-01 | 2.27E-01 | 0.765     | 0.533    | 1.097       | 0.684       | -        | -     | -      |
| 1     | FSH             | JAK2          | cg02405213  | Asthma  | Finngen    | IVW        | 2   | -0.227 | 0.074 | 2.21E-03 | 6.08E-03 | 0.797     | 0.689    | 0.922       | 0.778       | -        | -     | -      |
| 1     | FSH             | JAK2          | cg02405213  | Asthma  | F_T        | -          | -   | -0.233 | 0.069 | 7.15E-04 | 4.87E-03 | 0.792     | 0.692    | 0.907       | -           | -        | 0.000 | 0.834  |
| 1     | FSH             | JAK2          | cg20394284  | Asthma  | TAGC       | IVW        | 2   | 0.797  | 0.404 | 4.88E-02 | 1.51E-01 | 2.218     | 1.004    | 4.901       | 0.769       | -        | -     | -      |
| 1     | FSH             | JAK2          | cg20394284  | Asthma  | Finngen    | IVW        | 2   | 0.690  | 0.258 | 7.34E-03 | 1.54E-02 | 1.994     | 1.204    | 3.304       | 0.408       | -        | -     | -      |
| 1     | FSH             | JAK2          | cg20394284  | Asthma  | F_T        | -          | -   | 0.721  | 0.217 | 9.02E-04 | 4.87E-03 | 2.057     | 1.344    | 3.148       | -           | -        | 0.000 | 0.824  |
| 1     | FSH             | RBM6          | cg05635617  | Asthma  | TAGC       | Wald ratic | 1   | 0.985  | 1.835 | 5.92E-01 | 6.19E-01 | 2.677     | 0.073    | 97.587      | -           | -        | -     | -      |
| 1     | FSH             | RBM6          | cg05635617  | Asthma  | Finngen    | Wald ratic | 1   | 4.669  | 1.292 | 3.04E-04 | 1.33E-03 | 106.571   | 8.462    | 1342.202    | -           | -        | -     | -      |
| 1     | FSH             | RBM6          | cg05635617  | Asthma  | F_T        | -          | -   | 3.057  | 1.828 | 9.44E-02 | 1.15E-01 | 21.260    | 0.591    | 764.366     | -           | -        | 0.629 | 0.101  |
| 1     | FSH             | RBM6          | cg12257692  | Asthma  | TAGC       | Wald ratic | 1   | 0.381  | 0.766 | 6.19E-01 | 6.19E-01 | 1.464     | 0.326    | 6.567       | -           | -        | -     | -      |
| 1     | FSH             | RBM6          | cg12257692  | Asthma  | Finngen    | Wald ratic | 1   | 2.254  | 0.584 | 1.14E-04 | 1.25E-03 | 9.530     | 3.032    | 29.950      | -           | -        | -     | -      |
| 1     | FSH             | RBM6          | cg12257692  | Asthma  | F_T        | -          | -   | 1.383  | 0.935 | 1.39E-01 | 1.39E-01 | 3.987     | 0.639    | 24.896      | -           | -        | 0.736 | 0.052  |
| 1     | FSH             | RBM6          | cg21729847  | Asthma  | TAGC       | Wald ratic | 1   | 2.023  | 3.926 | 6.06E-01 | 6.19E-01 | 7.565     | 0.003    | 16636.334   | -           | -        | -     | -      |
| 1     | FSH             | RBM6          | cg21729847  | Asthma  | Finngen    | Wald ratic | 1   | 9.722  | 2.726 | 3.62E-04 | 1.33E-03 | 16685.043 | 79.746   | 3490950.573 | -           | -        | -     | -      |
| 1     | FSH             | RBM6          | cg21729847  | Asthma  | F_T        | -          | -   | 6.391  | 3.814 | 9.38E-02 | 1.15E-01 | 596.721   | 0.338    | 1053192.420 | -           | -        | 0.614 | 0.107  |
| 2     | GoDMC           | ETS1          | cg14998713  | Asthma  | TAGC_2     | Wald ratic | 1   | 0.249  | 0.103 | 1.62E-02 | 3.25E-02 | 1.282     | 1.047    | 1.570       | -           | -        | -     | -      |
| 2     | GoDMC           | ETS1          | cg14998713  | Asthma  | Finngen_2  | Wald ratic | 1   | 0.100  | 0.067 | 1.36E-01 | 1.36E-01 | 1.105     | 0.969    | 1.261       | -           | -        | -     | -      |
| 2     | GoDMC           | ETS1          | cg14998713  | Asthma  | F_T_2      | -          | -   | 0.144  | 0.056 | 1.05E-02 | 2.10E-02 | 1.155     | 1.034    | 1.290       | -           | -        | 0.309 | 0.229  |
| 2     | GoDMC           | ITPKB         | cg05306109  | Asthma  | TAGC_2     | Wald ratic | 1   | 0.143  | 0.121 | 2.35E-01 | 3.13E-01 | 1.154     | 0.911    | 1.462       | -           | -        | -     | -      |
| 2     | GoDMC           | ITPKB         | cg05306109  | Asthma  | Finngen_2  | Wald ratic | 1   | 0.175  | 0.084 | 3.70E-02 | 1.14E-01 | 1.191     | 1.011    | 1.403       | -           | -        | -     | -      |
| 2     | GoDMC           | ITPKB         | cg05306109  | Asthma  | F_T_2      | -          | -   | 0.164  | 0.069 | 1.68E-02 | 2.24E-02 | 1.179     | 1.030    | 1.349       | -           | -        | 0.000 | 0.831  |
| 2     | GoDMC           | ITPKB         | cg16265553  | Asthma  | TAGC_2     | Wald ratic | 1   | 0.304  | 0.126 | 1.58E-02 | 3.25E-02 | 1.355     | 1.059    | 1.735       | -           | -        | -     | -      |
| 2     | GoDMC           | ITPKB         | cg16265553  | Asthma  | Finn_2     | Wald ratic | 1   | 0.154  | 0.090 | 8.57E-02 | 1.14E-01 | 1.167     | 0.979    | 1.391       | -           | -        | -     | -      |
| 2     | GoDMC           | ITPKB         | cg16265553  | Asthma  | F_T        | -          | -   | 0.205  | 0.073 | 5.12E-03 | 2.05E-02 | 1.227     | 1.063    | 1.416       | -           | -        | 0.000 | 0.333  |
| 2     | GoDMC           | JAK2          | cg13661497  | Asthma  | TAGC_2     | Wald ratic | 1   | -0.059 | 0.177 | 7.41E-01 | 7.41E-01 | 0.943     | 0.666    | 1.335       | -           | -        | -     | -      |
| 2     | GoDMC           | JAK2          | cg13661497  | Asthma  | Finngen_2  | Wald ratic | 1   | -0.208 | 0.115 | 6.98E-02 | 1.14E-01 | 0.812     | 0.649    | 1.017       | -           | -        | -     | -      |
| 2     | GoDMC           | JAK2          | cg13661497  | Asthma  | F_T_2      | -          | -   | -0.164 | 0.096 | 8.87E-02 | 8.87E-02 | 0.849     | 0.703    | 1.025       | -           | -        | 0.000 | 0.480  |
| 3     | GoDMC           | ETS1          | cg08458745  | Asthma  | TAGC_2     | Wald ratic | 1   | -0.072 | 0.048 | 1.35E-01 | 3.97E-01 | 0.930     | 0.846    | 1.023       | -           | -        | -     | -      |
| 3     | GoDMC           | ETS1          | cg08458745  | Asthma  | Finngen_2  | Wald ratic | 1   | -0.075 | 0.032 | 2.10E-02 | 3.15E-02 | 0.928     | 0.871    | 0.989       | -           | -        | -     | -      |
| 3     | GoDMC           | ETS1          | cg08458745  | Asthma  | F_T_2      | -          | -   | -0.074 | 0.027 | 5.97E-03 | 8.96E-03 | 0.929     | 0.881    | 0.979       | -           | -        | 0.000 | 0.967  |
| 3     | GoDMC           | ETS1          | cg14718848  | Asthma  | TAGC_2     | IVW        | 2   | 0.002  | 0.056 | 9.73E-01 | 9.73E-01 | 1.002     | 0.899    | 1.117       | 0.029       | -        | -     | -      |
| 3     | GoDMC           | ETS1          | cg14718848  | Asthma  | Finngen_2  | IVW        | 3   | 0.023  | 0.020 | 2.46E-01 | 2.46E-01 | 1.023     | 0.984    | 1.064       | 0.273       | 0.458    | -     | -      |
| 3     | GoDMC           | ETS1          | cg14718848  | Asthma  | F_T_2      | -          | -   | 0.021  | 0.019 | 2.70E-01 | 2.70E-01 | 1.021     | 0.984    | 1.059       | -           | -        | 0.000 | 0.718  |
| 3     | GoDMC           | ETS1          | cg23774988  | Asthma  | TAGC_2     | Wald ratic | 1   | -0.766 | 0.278 | 5.84E-03 | 3.50E-02 | 0.465     | 0.270    | 0.801       | -           | -        | -     | -      |
| 3     | GoDMC           | ETS1          | cg23774988  | Asthma  | Finngen_2  | Wald ratic | 1   | -0.362 | 0.189 | 5.57E-02 | 6.68E-02 | 0.697     | 0.481    | 1.009       | -           | -        | -     | -      |
| 3     | GoDMC           | ETS1          | cg23774988  | Asthma  | F_T_2      | -          | -   | -0.490 | 0.156 | 1.73E-03 | 6.07E-03 | 0.613     | 0.451    | 0.833       | -           | -        | 0.309 | 0.229  |
| 3     | GoDMC           | ITPKB         | cg23717186  | Asthma  | TAGC_2     | Wald ratic | 1   | 0.084  | 0.071 | 2.35E-01 | 3.97E-01 | 1.088     | 0.947    | 1.249       | -           | -        | -     | -      |
| 3     | GoDMC           | ITPKB         | cg23717186  | Asthma  | Finngen_2  | Wald ratic | 1   | 0.111  | 0.044 | 1.20E-02 | 3.15E-02 | 1.117     | 1.025    | 1.218       | -           | -        | -     | -      |

|   |       |       |            |        |           |     |   |        |       |          |          |       |       |       |       |       |       |       |
|---|-------|-------|------------|--------|-----------|-----|---|--------|-------|----------|----------|-------|-------|-------|-------|-------|-------|-------|
| 3 | GoDMC | ITPKB | cg23717186 | Asthma | F_T_2     | -   | - | 0.103  | 0.037 | 5.77E-03 | 8.96E-03 | 1.109 | 1.030 | 1.193 | -     | -     | 0.000 | 0.750 |
| 3 | GoDMC | JAK2  | cg02405213 | Asthma | TAGC_2    | IVW | 3 | -0.013 | 0.013 | 3.31E-01 | 3.97E-01 | 0.987 | 0.962 | 1.013 | 0.402 | 0.538 | -     | -     |
| 3 | GoDMC | JAK2  | cg02405213 | Asthma | Finngen_2 | IVW | 3 | -0.026 | 0.009 | 2.27E-03 | 1.36E-02 | 0.974 | 0.958 | 0.991 | 0.730 | 0.639 | -     | -     |
| 3 | GoDMC | JAK2  | cg02405213 | Asthma | F_T_2     | -   | - | -0.022 | 0.007 | 2.02E-03 | 6.07E-03 | 0.978 | 0.964 | 0.992 | -     | -     | 0.000 | 0.391 |
| 3 | GoDMC | JAK2  | cg20394284 | Asthma | TAGC_2    | IVW | 3 | 0.025  | 0.026 | 3.28E-01 | 3.97E-01 | 1.026 | 0.975 | 1.079 | 0.569 | 0.546 | -     | -     |
| 3 | GoDMC | JAK2  | cg20394284 | Asthma | Finngen_2 | IVW | 2 | 0.050  | 0.021 | 1.76E-02 | 3.15E-02 | 1.051 | 1.009 | 1.096 | 0.217 | -     | -     | -     |
| 3 | GoDMC | JAK2  | cg20394284 | Asthma | F_T_2     | -   | - | 0.040  | 0.016 | 1.39E-02 | 1.67E-02 | 1.041 | 1.008 | 1.075 | -     | -     | 0.000 | 0.459 |

nsnp, the number of SNPs; CI, confidence intervals; hetero\_pval, p-value of Cochran Q test assessing heterogeneity of MR analysis; ple\_pval, p-value of MR-Egger regression examining horizontal pleiotropy effect of MR results; I2, I2 statistic assessing the heterogeneity of meta-analysis; pval\_Q, p-value of Cochran's Q test of meta-analysis; Finngen, exposure from FSH and outcome from Finngen; TAGC, exposure from FSH and outcome from Trans-National Asthma Genetic Consortium (TAGC); F\_T, meta-analysis of results from FSH→Finngen and FSH→TAGC; Finngen\_2, exposure from GoDMC and outcome from Finngen; TAGC, exposure from GoDMC and outcome from TAGC; F\_T\_2, meta-analysis of results from GoDMC→Finngen and GoDMC→TAGC.

**Table S14 Colocalization analysis between DNA methylation from GoDMC and asthma from UKB**

| Source exposure | Gene exposure | ID.exposure | outcome | ID.outcome | p1       | p2       | p12      | PP.H0.abf | PP.H1.abf | PP.H2.abf | PP.H3.abf | PP.H4.abf |
|-----------------|---------------|-------------|---------|------------|----------|----------|----------|-----------|-----------|-----------|-----------|-----------|
| GoDMC           | ITPKB         | cg23717186  | Asthma  | UKB        | 1.00E-04 | 1.00E-04 | 1.00E-05 | 0.000     | 0.063     | 0.000     | 0.004     | 0.934     |
| GoDMC           | ITPKB         | cg16265553  | Asthma  | UKB        | 1.00E-04 | 1.00E-04 | 1.00E-05 | 0.000     | 0.161     | 0.000     | 0.002     | 0.837     |
| GoDMC           | JAK2          | cg02405213  | Asthma  | UKB        | 1.00E-04 | 1.00E-04 | 1.00E-05 | 0.000     | 0.078     | 0.000     | 0.118     | 0.804     |
| GoDMC           | JAK2          | cg20394284  | Asthma  | UKB        | 1.00E-04 | 1.00E-04 | 1.00E-05 | 0.000     | 0.102     | 0.000     | 0.140     | 0.758     |
| GoDMC           | ETS1          | cg23774988  | Asthma  | UKB        | 1.00E-04 | 1.00E-04 | 1.00E-05 | 0.000     | 0.277     | 0.000     | 0.019     | 0.704     |
| GoDMC           | ETS1          | cg08458745  | Asthma  | UKB        | 1.00E-04 | 1.00E-04 | 1.00E-05 | 0.000     | 0.374     | 0.000     | 0.025     | 0.601     |
| GoDMC           | ETS1          | cg14718848  | Asthma  | UKB        | 1.00E-04 | 1.00E-04 | 1.00E-05 | 0.000     | 0.373     | 0.000     | 0.027     | 0.600     |
| GoDMC           | JAK2          | cg13661497  | Asthma  | UKB        | 1.00E-04 | 1.00E-04 | 1.00E-05 | 0.000     | 0.335     | 0.000     | 0.146     | 0.520     |
| GoDMC           | ETS1          | cg14998713  | Asthma  | UKB        | 1.00E-04 | 1.00E-04 | 1.00E-05 | 0.000     | 0.504     | 0.000     | 0.030     | 0.466     |
| GoDMC           | ITPKB         | cg05306109  | Asthma  | UKB        | 1.00E-04 | 1.00E-04 | 1.00E-05 | 0.000     | 0.513     | 0.000     | 0.023     | 0.465     |
| GoDMC           | ETS1          | cg01900413  | Asthma  | UKB        | 1.00E-04 | 1.00E-04 | 1.00E-05 | 0.000     | 0.850     | 0.000     | 0.053     | 0.098     |

p1, a prior probability for a SNP being associated with trait 1 only; p2, a prior probability for a SNP being associated with trait 2 only; p12, a prior probability for a SNP being associated with both traits.

**Table S15 SMR analysis of blood DNA methylation on gene expression**

| Source exposure | Gene exposure | ID.exposure | Source outcome | Gene outcome | topSNP     | A1 | A2 | b_SMR  | se_SMR | lo_ci  | up_ci  | p_SMR    | FDR_SMR   | p_HEIDI  | nsnp_HEIDI |
|-----------------|---------------|-------------|----------------|--------------|------------|----|----|--------|--------|--------|--------|----------|-----------|----------|------------|
| GoDMC           | ITPKB         | cg16265553  | eQTLGen        | ITPKB        | rs835665   | A  | G  | -0.457 | 0.090  | -0.633 | -0.281 | 3.58E-07 | 5.73E-07  | 1.87E-02 | 4          |
| GoDMC           | ITPKB         | cg23717186  | eQTLGen        | ITPKB        | rs3768410  | T  | C  | -0.509 | 0.047  | -0.601 | -0.417 | 1.81E-27 | 4.83E-27  | 1.16E-04 | 16         |
| GoDMC           | JAK2          | cg20394284  | eQTLGen        | JAK2         | rs10758669 | C  | A  | 0.266  | 0.014  | 0.239  | 0.294  | 8.41E-82 | 3.36E-81  | 5.08E-19 | 20         |
| GoDMC           | JAK2          | cg02405213  | eQTLGen        | JAK2         | rs7851556  | T  | C  | -0.185 | 0.008  | -0.200 | -0.170 | #####    | 3.70E-125 | 5.58E-24 | 20         |
| GoDMC           | JAK2          | cg13661497  | eQTLGen        | JAK2         | rs10491650 | C  | T  | -2.572 | 0.339  | -3.236 | -1.907 | 3.34E-14 | 6.67E-14  | 1.51E-02 | 8          |
| GoDMC           | ETS1          | cg23774988  | eQTLGen        | ETS1         | rs4396302  | A  | G  | -0.233 | 0.057  | -0.345 | -0.121 | 4.74E-05 | 4.74E-05  | 2.20E-03 | 20         |
| GoDMC           | ETS1          | cg14718848  | eQTLGen        | ETS1         | rs4245079  | A  | C  | 0.034  | 0.008  | 0.019  | 0.050  | 1.24E-05 | 1.66E-05  | 2.25E-04 | 20         |
| GoDMC           | ETS1          | cg08458745  | eQTLGen        | ETS1         | rs4245079  | A  | C  | -0.131 | 0.030  | -0.191 | -0.072 | 1.49E-05 | 1.70E-05  | 1.06E-03 | 20         |

HEIDI: heterogeneity in dependent instruments; nsnp, the number of SNPs.

**Table S16 TSMR analysis of blood DNA methylation on gene expression**

| Source exposure | Gene exposure | ID.exposure | Source outcome | Gene outcome | Method     | nsnp | b      | se    | pval      | FDR      | lo_ci  | up_ci  |
|-----------------|---------------|-------------|----------------|--------------|------------|------|--------|-------|-----------|----------|--------|--------|
| GoDMC           | ITPKB         | cg16265553  | eQTLGen        | ITPKB        | Wald ratio | 1    | -0.457 | 0.081 | 1.48E-08  | 1.48E-08 | -0.615 | -0.299 |
| GoDMC           | JAK2          | cg13661497  | eQTLGen        | JAK2         | Wald ratio | 1    | -2.572 | 0.110 | 3.49E-120 | #####    | -2.788 | -2.355 |

nsnp, the number of SNPs; CI, confidence intervals; hetero\_pval, p-value of Cochran Q test assessing heterogeneity of MR analysis; ple\_pval, p-value of MR-Egger regression examining horizontal pleiotropy effect of MR results.

**Table S17 Colocalization analysis between DNA methylation from GoDMC and gene expression from eQTLGen**

| Source exposure | Gene exposure | ID.exposure | Source outcome | Gene outcome | p1       | p2       | p12      | PP.H0.abf | PP.H1.abf | PP.H2.abf | PP.H3.abf | PP.H4.abf |
|-----------------|---------------|-------------|----------------|--------------|----------|----------|----------|-----------|-----------|-----------|-----------|-----------|
| GoDMC           | ITPKB         | cg16265553  | eQTLGen        | ITPKB        | 1.00E-04 | 1.00E-04 | 1.00E-05 | 0.000     | 0.000     | 0.000     | 0.019     | 0.981     |
| GoDMC           | JAK2          | cg13661497  | eQTLGen        | JAK2         | 1.00E-04 | 1.00E-04 | 1.00E-05 | 0.000     | 0.000     | 0.000     | 0.261     | 0.739     |

p1, a prior probability for a SNP being associated with trait 1 only; p2, a prior probability for a SNP being associated with trait 2 only; p12, a prior probability for a SNP being associated with both traits.



**Table S18 SMR analysis of additional blood DNA methylation on asthma in discovery phase**

| Source exposure | Gene exposure | ID.exposure | Outcome | ID.outcome | topSNP      | A1 | A2 | b_SMR  | se_SMR | p_SMR    | FDR_SMR  | p_HEIDI | nsnp_HEIDI |
|-----------------|---------------|-------------|---------|------------|-------------|----|----|--------|--------|----------|----------|---------|------------|
| GoDMC           | AFF3          | cg04109781  | Asthma  | UKB        | rs13001783  | T  | A  | -0.034 | 0.008  | 5.87E-06 | 5.49E-04 | 0.017   | 20         |
| GoDMC           | AFF3          | cg09521647  | Asthma  | UKB        | rs12992234  | A  | G  | -0.079 | 0.015  | 1.48E-07 | 2.02E-05 | 0.419   | 20         |
| GoDMC           | AFF3          | cg17356467  | Asthma  | UKB        | rs11682173  | T  | C  | -0.278 | 0.070  | 6.83E-05 | 4.68E-03 | 0.067   | 11         |
| GoDMC           | BACH2         | cg09471887  | Asthma  | UKB        | rs61754114  | C  | G  | 0.140  | 0.037  | 1.26E-04 | 7.90E-03 | 0.982   | 11         |
| GoDMC           | BACH2         | cg09790829  | Asthma  | UKB        | rs969577    | C  | T  | -0.486 | 0.057  | 1.86E-17 | 6.83E-15 | 0.328   | 13         |
| GoDMC           | BACH2         | cg09818385  | Asthma  | UKB        | rs62408211  | T  | A  | -0.566 | 0.073  | 1.16E-14 | 4.03E-12 | 0.013   | 14         |
| GoDMC           | BACH2         | cg10913050  | Asthma  | UKB        | rs969577    | C  | T  | -0.454 | 0.053  | 1.38E-17 | 5.42E-15 | 0.272   | 16         |
| GoDMC           | BACH2         | cg15380603  | Asthma  | UKB        | rs11757155  | T  | C  | -0.750 | 0.107  | 1.93E-12 | 5.42E-10 | 0.283   | 10         |
| GoDMC           | BACH2         | cg25670076  | Asthma  | UKB        | rs978224    | T  | G  | -0.344 | 0.071  | 1.13E-06 | 1.23E-04 | 0.030   | 3          |
| GoDMC           | BACH2         | cg27644327  | Asthma  | UKB        | rs12212193  | G  | A  | -0.716 | 0.105  | 8.65E-12 | 2.32E-09 | 0.261   | 8          |
| GoDMC           | BCL6          | cg06027254  | Asthma  | UKB        | rs3733018   | A  | C  | -0.163 | 0.047  | 5.20E-04 | 2.60E-02 | 0.083   | 17         |
| GoDMC           | BCL6          | cg17394304  | Asthma  | UKB        | rs1005099   | C  | A  | 0.135  | 0.037  | 2.57E-04 | 1.54E-02 | 0.058   | 20         |
| GoDMC           | BCL6          | cg19198148  | Asthma  | UKB        | rs1973791   | C  | A  | 0.346  | 0.096  | 3.31E-04 | 1.89E-02 | 0.050   | 4          |
| GoDMC           | CAMK4         | cg23385847  | Asthma  | UKB        | rs10054191  | C  | T  | -0.276 | 0.061  | 6.98E-06 | 6.32E-04 | 0.015   | 5          |
| GoDMC           | ING5          | cg12508715  | Asthma  | UKB        | rs3887696   | T  | C  | 0.196  | 0.044  | 9.22E-06 | 7.99E-04 | 0.010   | 3          |
| GoDMC           | ING5          | cg23350296  | Asthma  | UKB        | rs62191353  | A  | T  | 0.121  | 0.023  | 1.73E-07 | 2.32E-05 | 0.085   | 20         |
| GoDMC           | MRV11         | cg17542333  | Asthma  | UKB        | rs4909945   | T  | C  | 0.287  | 0.054  | 1.34E-07 | 1.88E-05 | 0.417   | 14         |
| GoDMC           | RAB13         | cg23251254  | Asthma  | UKB        | rs6724      | C  | G  | 0.241  | 0.070  | 6.05E-04 | 2.97E-02 | 0.691   | 20         |
| GoDMC           | RAB13         | cg24543596  | Asthma  | UKB        | rs11264734  | C  | T  | 0.236  | 0.067  | 3.92E-04 | 2.16E-02 | 0.713   | 8          |
| GoDMC           | RAB13         | cg26008365  | Asthma  | UKB        | rs138767862 | A  | G  | 0.226  | 0.065  | 4.96E-04 | 2.52E-02 | 0.623   | 8          |
| GoDMC           | RAB13         | cg26336059  | Asthma  | UKB        | rs138767862 | A  | G  | 0.179  | 0.050  | 4.01E-04 | 2.19E-02 | 0.580   | 20         |
| GoDMC           | RBM17         | cg02773640  | Asthma  | UKB        | rs41260244  | G  | A  | -0.162 | 0.046  | 4.44E-04 | 2.33E-02 | 0.011   | 8          |
| GoDMC           | RORC          | cg03005293  | Asthma  | UKB        | rs11801866  | A  | T  | -0.187 | 0.040  | 2.34E-06 | 2.38E-04 | 0.269   | 13         |

HEIDI: heterogeneity in dependent instruments; nsnp, the number of SNPs.

Table S19 TSMR analysis of additional blood DNA methylation on asthma in discovery phase

| Source exposure | Gene exposure | ID.exposure | outcome | ID.outcome | Method     | nsnp | b      | se    | pval     | FDR      | or    | or_lci95 | or_uci95 | hetero_pval | ple_pval |
|-----------------|---------------|-------------|---------|------------|------------|------|--------|-------|----------|----------|-------|----------|----------|-------------|----------|
| GoDMC           | AFF3          | cg04109781  | Asthma  | UKB        | IVW        | 3    | -0.061 | 0.025 | 1.40E-02 | 1.71E-02 | 0.941 | 0.897    | 0.988    | 0.014       | 0.910    |
| GoDMC           | AFF3          | cg09521647  | Asthma  | UKB        | IVW        | 3    | -0.078 | 0.015 | 9.10E-08 | 4.90E-07 | 0.925 | 0.899    | 0.952    | 0.881       | 0.963    |
| GoDMC           | AFF3          | cg17356467  | Asthma  | UKB        | Wald ratio | 1    | -0.222 | 0.083 | 7.80E-03 | 1.00E-02 | 0.801 | 0.681    | 0.943    | -           | -        |
| GoDMC           | BACH2         | cg09471887  | Asthma  | UKB        | Wald ratio | 1    | 0.140  | 0.035 | 7.86E-05 | 1.89E-04 | 1.150 | 1.073    | 1.233    | -           | -        |
| GoDMC           | BACH2         | cg09790829  | Asthma  | UKB        | Wald ratio | 1    | -0.500 | 0.049 | 1.75E-24 | 4.76E-23 | 0.607 | 0.551    | 0.668    | -           | -        |
| GoDMC           | BACH2         | cg09818385  | Asthma  | UKB        | Wald ratio | 1    | -0.614 | 0.060 | 1.20E-24 | 4.76E-23 | 0.541 | 0.481    | 0.609    | -           | -        |
| GoDMC           | BACH2         | cg10913050  | Asthma  | UKB        | Wald ratio | 1    | -0.472 | 0.046 | 2.32E-24 | 4.76E-23 | 0.624 | 0.570    | 0.683    | -           | -        |
| GoDMC           | BACH2         | cg15380603  | Asthma  | UKB        | Wald ratio | 1    | -0.766 | 0.078 | 1.29E-22 | 2.12E-21 | 0.465 | 0.399    | 0.542    | -           | -        |
| GoDMC           | BACH2         | cg25670076  | Asthma  | UKB        | Wald ratio | 1    | -0.344 | 0.063 | 5.00E-08 | 2.93E-07 | 0.709 | 0.627    | 0.802    | -           | -        |
| GoDMC           | BACH2         | cg27644327  | Asthma  | UKB        | Wald ratio | 1    | -0.716 | 0.076 | 7.64E-21 | 8.95E-20 | 0.489 | 0.421    | 0.568    | -           | -        |
| GoDMC           | BCL6          | cg06027254  | Asthma  | UKB        | Wald ratio | 1    | -0.279 | 0.069 | 5.72E-05 | 1.47E-04 | 0.757 | 0.661    | 0.867    | -           | -        |
| GoDMC           | BCL6          | cg17394304  | Asthma  | UKB        | Wald ratio | 1    | 0.135  | 0.036 | 2.06E-04 | 4.38E-04 | 1.144 | 1.066    | 1.228    | -           | -        |
| GoDMC           | BCL6          | cg19198148  | Asthma  | UKB        | Wald ratio | 1    | 0.346  | 0.086 | 5.33E-05 | 1.41E-04 | 1.413 | 1.195    | 1.671    | -           | -        |
| GoDMC           | CAMK4         | cg23385847  | Asthma  | UKB        | IVW        | 2    | -0.270 | 0.052 | 2.26E-07 | 9.75E-07 | 0.764 | 0.690    | 0.846    | 0.802       | -        |
| GoDMC           | ING5          | cg12508715  | Asthma  | UKB        | Wald ratio | 1    | 0.248  | 0.047 | 1.07E-07 | 5.18E-07 | 1.281 | 1.169    | 1.404    | -           | -        |
| GoDMC           | ING5          | cg23350296  | Asthma  | UKB        | Wald ratio | 1    | 0.147  | 0.032 | 3.71E-06 | 1.38E-05 | 1.158 | 1.088    | 1.233    | -           | -        |
| GoDMC           | MRV11         | cg17542333  | Asthma  | UKB        | Wald ratio | 1    | 0.287  | 0.051 | 1.84E-08 | 1.37E-07 | 1.332 | 1.206    | 1.472    | -           | -        |
| GoDMC           | RAB13         | cg23251254  | Asthma  | UKB        | Wald ratio | 1    | 0.228  | 0.070 | 1.20E-03 | 1.77E-03 | 1.256 | 1.094    | 1.442    | -           | -        |
| GoDMC           | RAB13         | cg24543596  | Asthma  | UKB        | Wald ratio | 1    | 0.236  | 0.064 | 2.08E-04 | 4.38E-04 | 1.267 | 1.118    | 1.435    | -           | -        |
| GoDMC           | RAB13         | cg26008365  | Asthma  | UKB        | Wald ratio | 1    | 0.226  | 0.062 | 2.74E-04 | 5.47E-04 | 1.253 | 1.110    | 1.415    | -           | -        |
| GoDMC           | RAB13         | cg26336059  | Asthma  | UKB        | Wald ratio | 1    | 0.193  | 0.058 | 8.24E-04 | 1.35E-03 | 1.213 | 1.083    | 1.359    | -           | -        |
| GoDMC           | RBM17         | cg02773640  | Asthma  | UKB        | Wald ratio | 1    | -0.162 | 0.045 | 3.20E-04 | 6.24E-04 | 0.850 | 0.778    | 0.929    | -           | -        |
| GoDMC           | RORC          | cg03005293  | Asthma  | UKB        | IVW        | 2    | -0.282 | 0.051 | 2.46E-08 | 1.62E-07 | 0.754 | 0.683    | 0.833    | 0.694       | -        |

nsnp, the number of SNPs; CI, confidence intervals; hetero\_pval, p-value of Cochran Q test assessing heterogeneity of MR analysis; ple\_pval, p-value of MR-Egger regression examining horizontal pleiotropy effect of MR results.

Table S20 SMR analysis of additional blood DNA methylation on asthma in replication phase

| Group | Source exposure | Gene exposure | ID.exposure | Outcome | ID.outcome | topSNP     | A1 | A2 | b_SMR   | se_SMR | p_SMR    | FDR_SMR  | p_HEIDI | nsnp_HEIDI | I2    | pval_Q |
|-------|-----------------|---------------|-------------|---------|------------|------------|----|----|---------|--------|----------|----------|---------|------------|-------|--------|
| 1     | FSH             | AFF3          | cg04109781  | Asthma  | TAGC       | rs13430705 | G  | A  | -0.283  | 0.315  | 3.69E-01 | 4.81E-01 | 0.926   | 20         | -     | -      |
| 1     | FSH             | AFF3          | cg04109781  | Asthma  | Finngen    | rs35869550 | T  | A  | -0.780  | 0.230  | 6.73E-04 | 2.46E-03 | 0.100   | 20         | -     | -      |
| 1     | FSH             | AFF3          | cg04109781  | Asthma  | F_T        | -          | -  | -  | -0.608  | 0.185  | 1.05E-03 | 5.02E-03 | -       | -          | 0.387 | 0.201  |
| 1     | FSH             | AFF3          | cg09521647  | Asthma  | TAGC       | rs13402299 | C  | T  | -0.773  | 1.017  | 4.47E-01 | 5.20E-01 | 0.821   | 20         | -     | -      |
| 1     | FSH             | AFF3          | cg09521647  | Asthma  | Finngen    | rs34040706 | G  | A  | -2.439  | 0.743  | 1.04E-03 | 3.42E-03 | 0.386   | 20         | -     | -      |
| 1     | FSH             | AFF3          | cg09521647  | Asthma  | F_T        | -          | -  | -  | -1.859  | 0.600  | 1.95E-03 | 8.40E-03 | -       | -          | 0.428 | 0.186  |
| 1     | FSH             | BACH2         | cg10913050  | Asthma  | TAGC       | rs2021716  | C  | T  | -13.392 | 2.499  | 8.41E-08 | 1.81E-06 | 0.184   | 5          | -     | -      |
| 1     | FSH             | BACH2         | cg10913050  | Asthma  | Finngen    | rs62408211 | A  | T  | -9.728  | 1.831  | 1.08E-07 | 1.17E-06 | 0.003   | 9          | -     | -      |
| 1     | FSH             | BACH2         | cg10913050  | Asthma  | F_T        | -          | -  | -  | -11.008 | 1.477  | 9.22E-14 | 1.32E-12 | -       | -          | 0.285 | 0.237  |
| 1     | FSH             | BCL6          | cg17394304  | Asthma  | TAGC       | rs1880100  | C  | T  | 3.886   | 2.856  | 1.74E-01 | 2.76E-01 | 0.441   | 11         | -     | -      |
| 1     | FSH             | BCL6          | cg17394304  | Asthma  | Finngen    | rs3774303  | G  | C  | 5.619   | 1.510  | 1.98E-04 | 9.44E-04 | 0.173   | 14         | -     | -      |
| 1     | FSH             | BCL6          | cg17394304  | Asthma  | F_T        | -          | -  | -  | 5.241   | 1.335  | 8.61E-05 | 4.63E-04 | -       | -          | 0.000 | 0.592  |
| 1     | FSH             | MRVI1         | cg17542333  | Asthma  | TAGC       | rs7940646  | C  | T  | 18.151  | 7.913  | 2.18E-02 | 5.21E-02 | -       | -          | -     | -      |
| 1     | FSH             | MRVI1         | cg17542333  | Asthma  | Finngen    | rs4910165  | G  | C  | 18.979  | 5.591  | 6.87E-04 | 2.46E-03 | -       | -          | -     | -      |
| 1     | FSH             | MRVI1         | cg17542333  | Asthma  | F_T        | -          | -  | -  | 18.703  | 4.566  | 4.20E-05 | 2.58E-04 | -       | -          | 0.000 | 0.932  |
| 1     | FSH             | RAB13         | cg26008365  | Asthma  | TAGC       | rs12048137 | T  | G  | 5.262   | 3.346  | 1.16E-01 | 2.07E-01 | 0.789   | 3          | -     | -      |
| 1     | FSH             | RAB13         | cg26008365  | Asthma  | Finngen    | rs12048137 | T  | G  | 3.917   | 2.256  | 8.26E-02 | 1.97E-01 | 0.584   | 4          | -     | -      |
| 1     | FSH             | RAB13         | cg26008365  | Asthma  | F_T        | -          | -  | -  | 4.337   | 1.871  | 2.04E-02 | 7.98E-02 | -       | -          | 0.000 | 0.739  |
| 1     | FSH             | RORC          | cg03005293  | Asthma  | TAGC       | rs11578418 | G  | A  | -7.710  | 5.083  | 1.29E-01 | 2.14E-01 | -       | -          | -     | -      |
| 1     | FSH             | RORC          | cg03005293  | Asthma  | Finngen    | rs11204896 | C  | G  | -5.255  | 3.268  | 1.08E-01 | 2.32E-01 | -       | -          | -     | -      |
| 1     | FSH             | RORC          | cg03005293  | Asthma  | F_T        | -          | -  | -  | -5.973  | 2.749  | 2.98E-02 | 9.85E-02 | -       | -          | 0.000 | 0.685  |
| 2     | GoDMC           | AFF3          | cg17356467  | Asthma  | TAGC_2     | rs11682173 | T  | C  | -0.091  | 0.126  | 4.70E-01 | 5.11E-01 | 0.690   | 8          | -     | -      |
| 2     | GoDMC           | AFF3          | cg17356467  | Asthma  | Finngen_2  | rs11682173 | T  | C  | -0.231  | 0.089  | 9.13E-03 | 1.52E-02 | 0.088   | 11         | -     | -      |
| 2     | GoDMC           | AFF3          | cg17356467  | Asthma  | F_T_2      | -          | -  | -  | -0.185  | 0.073  | 1.08E-02 | 2.26E-02 | -       | -          | 0.000 | 0.363  |
| 2     | GoDMC           | BACH2         | cg09745430  | Asthma  | TAGC_2     | rs2021716  | T  | C  | -1.002  | 0.177  | 1.43E-08 | 8.96E-08 | 0.005   | 10         | -     | -      |
| 2     | GoDMC           | BACH2         | cg09745430  | Asthma  | Finngen_2  | rs62408211 | T  | A  | -0.714  | 0.127  | 1.69E-08 | 1.41E-07 | 0.006   | 13         | -     | -      |
| 2     | GoDMC           | BACH2         | cg09745430  | Asthma  | F_T_2      | -          | -  | -  | -0.812  | 0.103  | 3.09E-15 | 3.86E-14 | -       | -          | 0.430 | 0.185  |
| 2     | GoDMC           | BACH2         | cg09818385  | Asthma  | TAGC_2     | rs2021716  | T  | C  | -0.791  | 0.131  | 1.45E-09 | 1.81E-08 | 0.006   | 10         | -     | -      |
| 2     | GoDMC           | BACH2         | cg09818385  | Asthma  | Finngen_2  | rs62408211 | T  | A  | -0.580  | 0.098  | 2.72E-09 | 3.41E-08 | 0.009   | 14         | -     | -      |
| 2     | GoDMC           | BACH2         | cg09818385  | Asthma  | F_T_2      | -          | -  | -  | -0.656  | 0.078  | 5.06E-17 | 1.26E-15 | -       | -          | 0.397 | 0.198  |
| 2     | GoDMC           | BACH2         | cg15380603  | Asthma  | TAGC_2     | rs11757155 | T  | C  | -1.029  | 0.180  | 1.06E-08 | 8.80E-08 | 0.211   | 7          | -     | -      |
| 2     | GoDMC           | BACH2         | cg15380603  | Asthma  | Finngen_2  | rs11757155 | T  | C  | -0.683  | 0.130  | 1.58E-07 | 7.88E-07 | 0.044   | 9          | -     | -      |
| 2     | GoDMC           | BACH2         | cg15380603  | Asthma  | F_T_2      | -          | -  | -  | -0.833  | 0.172  | 1.18E-06 | 5.89E-06 | -       | -          | 0.588 | 0.119  |
| 2     | GoDMC           | BACH2         | cg25670076  | Asthma  | TAGC_2     | rs3752747  | T  | C  | -0.677  | 0.159  | 1.96E-05 | 7.01E-05 | -       | -          | -     | -      |
| 2     | GoDMC           | BACH2         | cg25670076  | Asthma  | Finngen_2  | rs978224   | T  | G  | -0.382  | 0.089  | 1.57E-05 | 4.36E-05 | 0.935   | 3          | -     | -      |
| 2     | GoDMC           | BACH2         | cg25670076  | Asthma  | F_T_2      | -          | -  | -  | -0.500  | 0.144  | 5.33E-04 | 1.33E-03 | -       | -          | 0.620 | 0.105  |
| 2     | GoDMC           | BACH2         | cg27644327  | Asthma  | TAGC_2     | rs12212193 | G  | A  | -0.960  | 0.176  | 5.28E-08 | 2.64E-07 | 0.005   | 6          | -     | -      |
| 2     | GoDMC           | BACH2         | cg27644327  | Asthma  | Finngen_2  | rs12212193 | G  | A  | -0.619  | 0.124  | 5.88E-07 | 2.10E-06 | 0.034   | 7          | -     | -      |
| 2     | GoDMC           | BACH2         | cg27644327  | Asthma  | F_T_2      | -          | -  | -  | -0.766  | 0.169  | 5.76E-06 | 2.06E-05 | -       | -          | 0.601 | 0.114  |
| 2     | GoDMC           | BCL6          | cg06027254  | Asthma  | TAGC_2     | rs1005099  | C  | A  | -0.160  | 0.118  | 1.75E-01 | 2.30E-01 | 0.301   | 10         | -     | -      |
| 2     | GoDMC           | BCL6          | cg06027254  | Asthma  | Finngen_2  | rs3733018  | A  | C  | -0.290  | 0.063  | 4.46E-06 | 1.39E-05 | 0.020   | 17         | -     | -      |
| 2     | GoDMC           | BCL6          | cg06027254  | Asthma  | F_T_2      | -          | -  | -  | -0.261  | 0.056  | 2.80E-06 | 1.17E-05 | -       | -          | 0.000 | 0.330  |
| 2     | GoDMC           | BCL6          | cg19198148  | Asthma  | TAGC_2     | rs11717298 | G  | A  | 0.320   | 0.194  | 9.88E-02 | 1.45E-01 | -       | -          | -     | -      |
| 2     | GoDMC           | BCL6          | cg19198148  | Asthma  | Finngen_2  | rs1973791  | C  | A  | 0.526   | 0.134  | 8.40E-05 | 2.10E-04 | 0.218   | 4          | -     | -      |
| 2     | GoDMC           | BCL6          | cg19198148  | Asthma  | F_T_2      | -          | -  | -  | 0.459   | 0.110  | 2.99E-05 | 8.31E-05 | -       | -          | 0.000 | 0.381  |
| 2     | GoDMC           | CAMK4         | cg23385847  | Asthma  | TAGC_2     | rs10054191 | C  | T  | -0.385  | 0.116  | 8.56E-04 | 2.38E-03 | 0.003   | 3          | -     | -      |
| 2     | GoDMC           | CAMK4         | cg23385847  | Asthma  | Finngen_2  | rs10054191 | C  | T  | -0.386  | 0.075  | 2.74E-07 | 1.14E-06 | 0.004   | 5          | -     | -      |
| 2     | GoDMC           | CAMK4         | cg23385847  | Asthma  | F_T_2      | -          | -  | -  | -0.386  | 0.063  | 8.95E-10 | 5.59E-09 | -       | -          | 0.000 | 0.995  |
| 2     | GoDMC           | ING5          | cg12508715  | Asthma  | TAGC_2     | rs7420703  | C  | T  | 0.571   | 0.203  | 4.92E-03 | 1.02E-02 | -       | -          | -     | -      |
| 2     | GoDMC           | ING5          | cg12508715  | Asthma  | Finngen_2  | rs7605806  | A  | G  | 0.200   | 0.061  | 9.50E-04 | 1.98E-03 | 0.132   | 3          | -     | -      |
| 2     | GoDMC           | ING5          | cg12508715  | Asthma  | F_T_2      | -          | -  | -  | 0.335   | 0.178  | 6.04E-02 | 7.95E-02 | -       | -          | 0.674 | 0.080  |
| 2     | GoDMC           | ING5          | cg23350296  | Asthma  | TAGC_2     | rs10191556 | T  | C  | 0.318   | 0.109  | 3.42E-03 | 7.77E-03 | -       | -          | -     | -      |
| 2     | GoDMC           | ING5          | cg23350296  | Asthma  | Finngen_2  | rs62191353 | A  | T  | 0.108   | 0.031  | 4.70E-04 | 1.07E-03 | 0.013   | 20         | -     | -      |
| 2     | GoDMC           | ING5          | cg23350296  | Asthma  | F_T_2      | -          | -  | -  | 0.187   | 0.102  | 6.68E-02 | 8.35E-02 | -       | -          | 0.712 | 0.062  |
| 2     | GoDMC           | RAB13         | cg23251254  | Asthma  | TAGC_2     | rs11264743 | T  | C  | 0.117   | 0.132  | 3.74E-01 | 4.25E-01 | 0.218   | 15         | -     | -      |
| 2     | GoDMC           | RAB13         | cg23251254  | Asthma  | Finngen_2  | rs6724     | C  | G  | 0.159   | 0.086  | 6.34E-02 | 7.55E-02 | 0.415   | 20         | -     | -      |

|   |       |       |            |        |           |             |   |   |        |       |          |          |       |    |       |       |
|---|-------|-------|------------|--------|-----------|-------------|---|---|--------|-------|----------|----------|-------|----|-------|-------|
| 2 | GoDMC | RAB13 | cg23251254 | Asthma | F_T_2     | -           | - | - | 0.147  | 0.072 | 4.13E-02 | 5.73E-02 | -     | -  | 0.000 | 0.789 |
| 2 | GoDMC | RAB13 | cg24543596 | Asthma | TAGC_2    | rs11264743  | T | C | 0.108  | 0.122 | 3.74E-01 | 4.25E-01 | 0.224 | 4  | -     | -     |
| 2 | GoDMC | RAB13 | cg24543596 | Asthma | Finngen_2 | rs11264734  | C | T | 0.153  | 0.081 | 6.08E-02 | 7.55E-02 | 0.912 | 6  | -     | -     |
| 2 | GoDMC | RAB13 | cg24543596 | Asthma | F_T_2     | -           | - | - | 0.139  | 0.068 | 4.00E-02 | 5.73E-02 | -     | -  | 0.000 | 0.762 |
| 2 | GoDMC | RAB13 | cg26336059 | Asthma | TAGC_2    | rs6701341   | T | C | 0.117  | 0.099 | 2.35E-01 | 2.93E-01 | 0.269 | 14 | -     | -     |
| 2 | GoDMC | RAB13 | cg26336059 | Asthma | Finngen_2 | rs138767862 | A | G | 0.119  | 0.063 | 5.74E-02 | 7.55E-02 | 0.324 | 20 | -     | -     |
| 2 | GoDMC | RAB13 | cg26336059 | Asthma | F_T_2     | -           | - | - | 0.119  | 0.053 | 2.50E-02 | 4.17E-02 | -     | -  | 0.000 | 0.986 |
| 2 | GoDMC | RBM17 | cg02773640 | Asthma | TAGC_2    | rs11593569  | T | G | -0.282 | 0.132 | 3.29E-02 | 5.49E-02 | -     | -  | -     | -     |
| 2 | GoDMC | RBM17 | cg02773640 | Asthma | Finngen_2 | rs41260244  | G | A | -0.112 | 0.051 | 2.93E-02 | 4.58E-02 | 0.832 | 8  | -     | -     |
| 2 | GoDMC | RBM17 | cg02773640 | Asthma | F_T_2     | -           | - | - | -0.134 | 0.048 | 5.06E-03 | 1.15E-02 | -     | -  | 0.306 | 0.230 |
| 3 | GoDMC | AFB3  | cg04109781 | Asthma | Finngen_2 | rs13001783  | T | A | -0.036 | 0.011 | 6.66E-04 | 8.88E-04 | 0.029 | 20 | -     | -     |
| 3 | GoDMC | AFB3  | cg04109781 | Asthma | TAGC_2    | rs4851244   | C | T | -0.014 | 0.015 | 3.45E-01 | 4.27E-01 | 0.918 | 20 | -     | -     |
| 3 | GoDMC | AFB3  | cg04109781 | Asthma | F_T_2     | -           | - | - | -0.028 | 0.009 | 9.42E-04 | 1.51E-03 | -     | -  | 0.349 | 0.215 |
| 3 | GoDMC | AFB3  | cg09521647 | Asthma | Finngen_2 | rs12992234  | A | G | -0.081 | 0.021 | 1.18E-04 | 2.36E-04 | 0.383 | 20 | -     | -     |
| 3 | GoDMC | AFB3  | cg09521647 | Asthma | TAGC_2    | rs12992234  | A | G | -0.012 | 0.029 | 6.87E-01 | 6.87E-01 | 0.639 | 20 | -     | -     |
| 3 | GoDMC | AFB3  | cg09521647 | Asthma | F_T_2     | -           | - | - | -0.049 | 0.034 | 1.56E-01 | 1.56E-01 | -     | -  | 0.736 | 0.052 |
| 3 | GoDMC | BACH2 | cg09790829 | Asthma | Finngen_2 | rs969577    | C | T | -0.459 | 0.077 | 3.06E-09 | 1.22E-08 | 0.056 | 12 | -     | -     |
| 3 | GoDMC | BACH2 | cg09790829 | Asthma | TAGC_2    | rs943689    | T | C | -0.670 | 0.104 | 1.02E-10 | 4.08E-10 | 0.115 | 10 | -     | -     |
| 3 | GoDMC | BACH2 | cg09790829 | Asthma | F_T_2     | -           | - | - | -0.553 | 0.105 | 1.30E-07 | 1.04E-06 | -     | -  | 0.623 | 0.103 |
| 3 | GoDMC | BACH2 | cg10913050 | Asthma | Finngen_2 | rs969577    | C | T | -0.429 | 0.072 | 2.85E-09 | 1.22E-08 | 0.031 | 15 | -     | -     |
| 3 | GoDMC | BACH2 | cg10913050 | Asthma | TAGC_2    | rs2325292   | C | T | -0.636 | 0.098 | 7.93E-11 | 4.08E-10 | 0.027 | 10 | -     | -     |
| 3 | GoDMC | BACH2 | cg10913050 | Asthma | F_T_2     | -           | - | - | -0.522 | 0.103 | 3.97E-07 | 1.59E-06 | -     | -  | 0.655 | 0.089 |
| 3 | GoDMC | BCL6  | cg17394304 | Asthma | Finngen_2 | rs1005099   | C | A | 0.222  | 0.050 | 9.14E-06 | 2.44E-05 | 0.108 | 20 | -     | -     |
| 3 | GoDMC | BCL6  | cg17394304 | Asthma | TAGC_2    | rs1005099   | C | A | 0.100  | 0.073 | 1.74E-01 | 2.78E-01 | 0.255 | 12 | -     | -     |
| 3 | GoDMC | BCL6  | cg17394304 | Asthma | F_T_2     | -           | - | - | 0.183  | 0.041 | 9.32E-06 | 1.86E-05 | -     | -  | 0.471 | 0.169 |
| 3 | GoDMC | MRV11 | cg17542333 | Asthma | Finngen_2 | rs4909945   | T | C | 0.249  | 0.068 | 2.50E-04 | 4.00E-04 | 0.110 | 14 | -     | -     |
| 3 | GoDMC | MRV11 | cg17542333 | Asthma | TAGC_2    | rs4909945   | T | C | 0.309  | 0.099 | 1.83E-03 | 4.89E-03 | 0.704 | 12 | -     | -     |
| 3 | GoDMC | MRV11 | cg17542333 | Asthma | F_T_2     | -           | - | - | 0.269  | 0.056 | 1.73E-06 | 4.61E-06 | -     | -  | 0.000 | 0.619 |
| 3 | GoDMC | RAB13 | cg26008365 | Asthma | Finngen_2 | rs138767862 | A | G | 0.151  | 0.080 | 5.86E-02 | 5.86E-02 | 0.992 | 8  | -     | -     |
| 3 | GoDMC | RAB13 | cg26008365 | Asthma | TAGC_2    | rs11264743  | T | C | 0.111  | 0.125 | 3.74E-01 | 4.27E-01 | 0.502 | 6  | -     | -     |
| 3 | GoDMC | RAB13 | cg26008365 | Asthma | F_T_2     | -           | - | - | 0.139  | 0.067 | 3.82E-02 | 4.36E-02 | -     | -  | 0.000 | 0.789 |
| 3 | GoDMC | RORC  | cg03005293 | Asthma | Finngen_2 | rs11801866  | A | T | -0.095 | 0.050 | 5.82E-02 | 5.86E-02 | 0.571 | 11 | -     | -     |
| 3 | GoDMC | RORC  | cg03005293 | Asthma | TAGC_2    | rs11578418  | A | G | -0.121 | 0.078 | 1.22E-01 | 2.43E-01 | 0.645 | 7  | -     | -     |
| 3 | GoDMC | RORC  | cg03005293 | Asthma | F_T_2     | -           | - | - | -0.102 | 0.042 | 1.51E-02 | 2.02E-02 | -     | -  | 0.000 | 0.776 |

HEIDI: heterogeneity in dependent instruments; nsnp, the number of SNPs; I2, I2 statistic assessing the heterogeneity of meta-analysis; pval\_Q, p-value of Cochran's Q test of meta-analysis; Finngen, exposure from FSH and outcome from Finngen; TAGC, exposure from FSH and outcome from Trans-National Asthma Genetic Consortium (TAGC); F\_T, meta-analysis of results from FSH→Finngen and FSH→TAGC; Finngen\_2, exposure from GoDMC and outcome from Finngen; TAGC, exposure from GoDMC and outcome from TAGC; F\_T\_2, meta-analysis of results from GoDMC→Finngen and GoDMC→TAGC.

Table S21 TSMR analysis of additional blood DNA methylation on asthma in replication phase

| Group | Source exposure | Gene exposure | ID.exposure | Outcome | ID.outcome | Method     | nsp | b       | se    | pval     | FDR      | lo_ci   | up_ci   | hetero_pval | ple_pval | I2    | pval_Q |
|-------|-----------------|---------------|-------------|---------|------------|------------|-----|---------|-------|----------|----------|---------|---------|-------------|----------|-------|--------|
| 1     | FSH             | AFF3          | cg04109781  | Asthma  | TAGC       | IVW        | 2   | -0.332  | 0.504 | 5.10E-01 | 5.78E-01 | -1.319  | 0.656   | 0.283       | -        | -     | -      |
| 1     | FSH             | AFF3          | cg04109781  | Asthma  | Finngen    | IVW        | 4   | -0.935  | 0.461 | 4.28E-02 | 1.06E-01 | -1.839  | -0.030  | 0.011       | 0.560    | -     | -      |
| 1     | FSH             | AFF3          | cg04109781  | Asthma  | F_T        | -          | -   | -0.660  | 0.340 | 5.26E-02 | 1.51E-01 | -1.326  | 0.007   | -           | -        | 0.000 | 0.378  |
| 1     | FSH             | AFF3          | cg09521647  | Asthma  | TAGC       | Wald ratio | 1   | -0.773  | 1.017 | 4.47E-01 | 5.34E-01 | -2.766  | 1.219   | -           | -        | -     | -      |
| 1     | FSH             | AFF3          | cg09521647  | Asthma  | Finngen    | IVW        | 2   | -2.273  | 1.086 | 3.63E-02 | 9.47E-02 | -4.401  | -0.145  | 0.136       | -        | -     | -      |
| 1     | FSH             | AFF3          | cg09521647  | Asthma  | F_T        | -          | -   | -1.474  | 0.742 | 4.70E-02 | 1.51E-01 | -2.928  | -0.019  | -           | -        | 0.017 | 0.313  |
| 1     | FSH             | BACH2         | cg09790829  | Asthma  | TAGC       | Wald ratio | 1   | -29.659 | 4.236 | 2.54E-12 | 5.46E-11 | -37.962 | -21.356 | -           | -        | -     | -      |
| 1     | FSH             | BACH2         | cg09790829  | Asthma  | Finngen    | Wald ratio | 1   | -20.025 | 3.187 | 3.31E-10 | 7.63E-09 | -26.271 | -13.778 | -           | -        | -     | -      |
| 1     | FSH             | BACH2         | cg09790829  | Asthma  | F_T        | -          | -   | -24.437 | 4.800 | 3.56E-07 | 3.83E-06 | -33.846 | -15.029 | -           | -        | 0.697 | 0.069  |
| 1     | FSH             | BACH2         | cg10913050  | Asthma  | TAGC       | Wald ratio | 1   | -13.392 | 1.946 | 5.95E-12 | 8.53E-11 | -17.207 | -9.577  | -           | -        | -     | -      |
| 1     | FSH             | BACH2         | cg10913050  | Asthma  | Finngen    | Wald ratio | 1   | -9.728  | 1.449 | 1.89E-11 | 8.89E-10 | -12.568 | -6.888  | -           | -        | -     | -      |
| 1     | FSH             | BACH2         | cg10913050  | Asthma  | F_T        | -          | -   | -11.330 | 1.817 | 4.54E-10 | 6.51E-09 | -14.892 | -7.768  | -           | -        | 0.561 | 0.131  |
| 1     | FSH             | BCL6          | cg17394304  | Asthma  | TAGC       | Wald ratio | 1   | 3.886   | 2.826 | 1.69E-01 | 2.69E-01 | -1.652  | 9.425   | -           | -        | -     | -      |
| 1     | FSH             | BCL6          | cg17394304  | Asthma  | Finngen    | Wald ratio | 1   | 5.619   | 1.401 | 6.05E-05 | 3.56E-04 | 2.873   | 8.365   | -           | -        | -     | -      |
| 1     | FSH             | BCL6          | cg17394304  | Asthma  | F_T        | -          | -   | 5.277   | 1.255 | 2.62E-05 | 1.41E-04 | 2.817   | 7.737   | -           | -        | 0.000 | 0.583  |
| 1     | FSH             | MRV11         | cg17542333  | Asthma  | TAGC       | Wald ratio | 1   | 18.151  | 7.527 | 1.59E-02 | 3.80E-02 | 3.398   | 32.904  | -           | -        | -     | -      |
| 1     | FSH             | MRV11         | cg17542333  | Asthma  | Finngen    | Wald ratio | 1   | 18.979  | 4.975 | 1.36E-04 | 6.41E-04 | 9.228   | 28.730  | -           | -        | -     | -      |
| 1     | FSH             | MRV11         | cg17542333  | Asthma  | F_T        | -          | -   | 18.727  | 4.150 | 6.42E-06 | 3.94E-05 | 10.592  | 26.862  | -           | -        | 0.000 | 0.927  |
| 1     | FSH             | RAB13         | cg26008365  | Asthma  | TAGC       | Wald ratio | 1   | 5.262   | 3.260 | 1.07E-01 | 1.91E-01 | -1.128  | 11.653  | -           | -        | -     | -      |
| 1     | FSH             | RAB13         | cg26008365  | Asthma  | Finngen    | Wald ratio | 1   | 3.917   | 2.185 | 7.31E-02 | 1.64E-01 | -0.366  | 8.200   | -           | -        | -     | -      |
| 1     | FSH             | RAB13         | cg26008365  | Asthma  | F_T        | -          | -   | 4.334   | 1.815 | 1.70E-02 | 7.30E-02 | 0.776   | 7.892   | -           | -        | 0.000 | 0.732  |
| 1     | FSH             | RORC          | cg03005293  | Asthma  | TAGC       | Wald ratio | 1   | -7.710  | 4.961 | 1.20E-01 | 2.07E-01 | -17.434 | 2.014   | -           | -        | -     | -      |
| 1     | FSH             | RORC          | cg03005293  | Asthma  | Finngen    | Wald ratio | 1   | -5.255  | 3.182 | 9.86E-02 | 2.01E-01 | -11.491 | 0.980   | -           | -        | -     | -      |
| 1     | FSH             | RORC          | cg03005293  | Asthma  | F_T        | -          | -   | -5.971  | 2.678 | 2.58E-02 | 1.01E-01 | -11.220 | -0.721  | -           | -        | 0.000 | 0.677  |
| 2     | GoDMC           | AFF3          | cg17356467  | Asthma  | TAGC_2     | Wald ratio | 1   | -0.068  | 0.179 | 7.04E-01 | 7.04E-01 | -0.419  | 0.283   | -           | -        | -     | -      |
| 2     | GoDMC           | AFF3          | cg17356467  | Asthma  | Finngen_2  | Wald ratio | 1   | -0.187  | 0.110 | 9.01E-02 | 1.19E-01 | -0.402  | 0.029   | -           | -        | -     | -      |
| 2     | GoDMC           | AFF3          | cg17356467  | Asthma  | F_T_2      | -          | -   | -0.154  | 0.094 | 1.00E-01 | 1.28E-01 | -0.338  | 0.030   | -           | -        | 0.000 | 0.573  |
| 2     | GoDMC           | BACH2         | cg09745430  | Asthma  | TAGC_2     | Wald ratio | 1   | -1.002  | 0.146 | 5.95E-12 | 4.96E-11 | -1.288  | -0.717  | -           | -        | -     | -      |
| 2     | GoDMC           | BACH2         | cg09745430  | Asthma  | Finngen_2  | Wald ratio | 1   | -0.714  | 0.106 | 1.89E-11 | 2.37E-10 | -0.923  | -0.506  | -           | -        | -     | -      |
| 2     | GoDMC           | BACH2         | cg09745430  | Asthma  | F_T_2      | -          | -   | -0.841  | 0.143 | 3.99E-09 | 4.99E-08 | -1.121  | -0.561  | -           | -        | 0.608 | 0.110  |
| 2     | GoDMC           | BACH2         | cg09818385  | Asthma  | TAGC_2     | Wald ratio | 1   | -0.839  | 0.117 | 9.00E-13 | 1.13E-11 | -1.069  | -0.609  | -           | -        | -     | -      |
| 2     | GoDMC           | BACH2         | cg09818385  | Asthma  | Finngen_2  | Wald ratio | 1   | -0.538  | 0.088 | 9.97E-10 | 8.31E-09 | -0.710  | -0.365  | -           | -        | -     | -      |
| 2     | GoDMC           | BACH2         | cg09818385  | Asthma  | F_T_2      | -          | -   | -0.678  | 0.150 | 6.17E-06 | 2.20E-05 | -0.972  | -0.384  | -           | -        | 0.762 | 0.040  |
| 2     | GoDMC           | BACH2         | cg15380603  | Asthma  | TAGC_2     | Wald ratio | 1   | -1.023  | 0.152 | 1.85E-11 | 1.15E-10 | -1.322  | -0.725  | -           | -        | -     | -      |
| 2     | GoDMC           | BACH2         | cg15380603  | Asthma  | Finngen_2  | Wald ratio | 1   | -0.684  | 0.114 | 1.71E-09 | 1.07E-08 | -0.906  | -0.461  | -           | -        | -     | -      |
| 2     | GoDMC           | BACH2         | cg15380603  | Asthma  | F_T_2      | -          | -   | -0.838  | 0.169 | 7.22E-07 | 6.02E-06 | -1.170  | -0.507  | -           | -        | 0.687 | 0.074  |
| 2     | GoDMC           | BACH2         | cg25670076  | Asthma  | TAGC_2     | Wald ratio | 1   | -0.677  | 0.143 | 2.29E-06 | 9.54E-06 | -0.958  | -0.396  | -           | -        | -     | -      |
| 2     | GoDMC           | BACH2         | cg25670076  | Asthma  | Finngen_2  | Wald ratio | 1   | -0.382  | 0.081 | 2.47E-06 | 8.82E-06 | -0.542  | -0.223  | -           | -        | -     | -      |
| 2     | GoDMC           | BACH2         | cg25670076  | Asthma  | F_T_2      | -          | -   | -0.506  | 0.146 | 5.05E-04 | 1.40E-03 | -0.792  | -0.221  | -           | -        | 0.688 | 0.073  |
| 2     | GoDMC           | BACH2         | cg27644327  | Asthma  | TAGC_2     | Wald ratio | 1   | -0.960  | 0.148 | 8.42E-11 | 4.21E-10 | -1.249  | -0.670  | -           | -        | -     | -      |
| 2     | GoDMC           | BACH2         | cg27644327  | Asthma  | Finngen_2  | Wald ratio | 1   | -0.619  | 0.107 | 7.89E-09 | 3.29E-08 | -0.829  | -0.409  | -           | -        | -     | -      |
| 2     | GoDMC           | BACH2         | cg27644327  | Asthma  | F_T_2      | -          | -   | -0.774  | 0.170 | 5.17E-06 | 2.15E-05 | -1.107  | -0.441  | -           | -        | 0.713 | 0.062  |
| 2     | GoDMC           | BCL6          | cg06027254  | Asthma  | TAGC_2     | Wald ratio | 1   | -0.176  | 0.121 | 1.44E-01 | 1.89E-01 | -0.413  | 0.060   | -           | -        | -     | -      |
| 2     | GoDMC           | BCL6          | cg06027254  | Asthma  | Finngen_2  | IVW        | 2   | -0.374  | 0.162 | 2.10E-02 | 4.04E-02 | -0.691  | -0.056  | 0.063       | -        | -     | -      |
| 2     | GoDMC           | BCL6          | cg06027254  | Asthma  | F_T_2      | -          | -   | -0.247  | 0.097 | 1.07E-02 | 2.44E-02 | -0.436  | -0.057  | -           | -        | 0.000 | 0.328  |
| 2     | GoDMC           | BCL6          | cg19198148  | Asthma  | TAGC_2     | Wald ratio | 1   | 0.320   | 0.189 | 9.03E-02 | 1.41E-01 | -0.050  | 0.689   | -           | -        | -     | -      |
| 2     | GoDMC           | BCL6          | cg19198148  | Asthma  | Finngen_2  | Wald ratio | 1   | 0.526   | 0.116 | 5.36E-06 | 1.67E-05 | 0.299   | 0.752   | -           | -        | -     | -      |
| 2     | GoDMC           | BCL6          | cg19198148  | Asthma  | F_T_2      | -          | -   | 0.470   | 0.099 | 1.89E-06 | 9.44E-06 | 0.276   | 0.663   | -           | -        | 0.000 | 0.351  |
| 2     | GoDMC           | CAMK4         | cg23385847  | Asthma  | TAGC_2     | IVW        | 2   | -0.405  | 0.101 | 5.71E-05 | 2.04E-04 | -0.603  | -0.208  | 0.682       | -        | -     | -      |
| 2     | GoDMC           | CAMK4         | cg23385847  | Asthma  | Finngen_2  | IVW        | 2   | -0.462  | 0.176 | 8.64E-03 | 1.80E-02 | -0.807  | -0.117  | 0.006       | -        | -     | -      |
| 2     | GoDMC           | CAMK4         | cg23385847  | Asthma  | F_T_2      | -          | -   | -0.419  | 0.087 | 1.61E-06 | 9.44E-06 | -0.590  | -0.248  | -           | -        | 0.000 | 0.780  |
| 2     | GoDMC           | ING5          | cg12508715  | Asthma  | TAGC_2     | Wald ratio | 1   | 0.571   | 0.188 | 2.40E-03 | 5.15E-03 | 0.202   | 0.940   | -           | -        | -     | -      |
| 2     | GoDMC           | ING5          | cg12508715  | Asthma  | Finngen_2  | Wald ratio | 1   | 0.223   | 0.064 | 4.63E-04 | 1.29E-03 | 0.098   | 0.349   | -           | -        | -     | -      |
| 2     | GoDMC           | ING5          | cg12508715  | Asthma  | F_T_2      | -          | -   | 0.352   | 0.168 | 3.58E-02 | 5.93E-02 | 0.023   | 0.681   | -           | -        | 0.673 | 0.080  |
| 2     | GoDMC           | ING5          | cg23350296  | Asthma  | TAGC_2     | IVW        | 2   | 0.294   | 0.097 | 2.47E-03 | 5.15E-03 | 0.104   | 0.485   | 0.569       | -        | -     | -      |
| 2     | GoDMC           | ING5          | cg23350296  | Asthma  | Finngen_2  | Wald ratio | 1   | 0.050   | 0.042 | 2.34E-01 | 2.66E-01 | -0.032  | 0.133   | -           | -        | -     | -      |

|   |       |       |            |        |           |            |   |        |       |          |          |        |        |       |       |       |       |
|---|-------|-------|------------|--------|-----------|------------|---|--------|-------|----------|----------|--------|--------|-------|-------|-------|-------|
| 2 | GoDMC | ING5  | cg23350296 | Asthma | F_T_2     | -          | - | 0.157  | 0.121 | 1.95E-01 | 2.33E-01 | -0.080 | 0.393  | -     | -     | 0.811 | 0.021 |
| 2 | GoDMC | RAB13 | cg23251254 | Asthma | TAGC_2    | Wald ratio | 1 | 0.285  | 0.191 | 1.36E-01 | 1.89E-01 | -0.090 | 0.659  | -     | -     | -     | -     |
| 2 | GoDMC | RAB13 | cg23251254 | Asthma | Finngen_2 | Wald ratio | 1 | 0.133  | 0.090 | 1.40E-01 | 1.75E-01 | -0.044 | 0.311  | -     | -     | -     | -     |
| 2 | GoDMC | RAB13 | cg23251254 | Asthma | F_T_2     | -          | - | 0.161  | 0.082 | 4.86E-02 | 7.15E-02 | 0.001  | 0.321  | -     | -     | 0.000 | 0.474 |
| 2 | GoDMC | RAB13 | cg24543596 | Asthma | TAGC_2    | Wald ratio | 1 | 0.108  | 0.121 | 3.72E-01 | 4.23E-01 | -0.130 | 0.346  | -     | -     | -     | -     |
| 2 | GoDMC | RAB13 | cg24543596 | Asthma | Finngen_2 | Wald ratio | 1 | 0.153  | 0.080 | 5.77E-02 | 9.01E-02 | -0.005 | 0.311  | -     | -     | -     | -     |
| 2 | GoDMC | RAB13 | cg24543596 | Asthma | F_T_2     | -          | - | 0.139  | 0.067 | 3.80E-02 | 5.93E-02 | 0.008  | 0.271  | -     | -     | 0.000 | 0.761 |
| 2 | GoDMC | RAB13 | cg26336059 | Asthma | TAGC_2    | Wald ratio | 1 | 0.144  | 0.115 | 2.09E-01 | 2.61E-01 | -0.081 | 0.369  | -     | -     | -     | -     |
| 2 | GoDMC | RAB13 | cg26336059 | Asthma | Finngen_2 | Wald ratio | 1 | 0.132  | 0.073 | 6.92E-02 | 1.02E-01 | -0.010 | 0.275  | -     | -     | -     | -     |
| 2 | GoDMC | RAB13 | cg26336059 | Asthma | F_T_2     | -          | - | 0.136  | 0.061 | 2.73E-02 | 4.88E-02 | 0.015  | 0.256  | -     | -     | 0.000 | 0.930 |
| 2 | GoDMC | RBM17 | cg02773640 | Asthma | TAGC_2    | Wald ratio | 1 | -0.282 | 0.130 | 3.04E-02 | 5.43E-02 | -0.537 | -0.027 | -     | -     | -     | -     |
| 2 | GoDMC | RBM17 | cg02773640 | Asthma | Finngen_2 | Wald ratio | 1 | -0.112 | 0.051 | 2.79E-02 | 4.98E-02 | -0.211 | -0.012 | -     | -     | -     | -     |
| 2 | GoDMC | RBM17 | cg02773640 | Asthma | F_T_2     | -          | - | -0.134 | 0.047 | 4.57E-03 | 1.14E-02 | -0.227 | -0.041 | -     | -     | 0.325 | 0.224 |
| 3 | GoDMC | AFF3  | cg04109781 | Asthma | Finngen_2 | IVW        | 5 | -0.060 | 0.026 | 2.10E-02 | 2.79E-02 | -0.111 | -0.009 | 0.119 | 0.386 | -     | -     |
| 3 | GoDMC | AFF3  | cg04109781 | Asthma | TAGC_2    | IVW        | 3 | 0.053  | 0.041 | 1.96E-01 | 2.61E-01 | -0.027 | 0.134  | 0.991 | 0.922 | -     | -     |
| 3 | GoDMC | AFF3  | cg04109781 | Asthma | F_T_2     | -          | - | -0.008 | 0.056 | 8.90E-01 | 8.90E-01 | -0.118 | 0.103  | -     | -     | 0.815 | 0.020 |
| 3 | GoDMC | AFF3  | cg09521647 | Asthma | Finngen_2 | IVW        | 3 | -0.089 | 0.020 | 6.65E-06 | 1.77E-05 | -0.128 | -0.050 | 0.591 | 0.841 | -     | -     |
| 3 | GoDMC | AFF3  | cg09521647 | Asthma | TAGC_2    | IVW        | 3 | 0.000  | 0.053 | 9.98E-01 | 9.98E-01 | -0.104 | 0.104  | 0.596 | 0.767 | -     | -     |
| 3 | GoDMC | AFF3  | cg09521647 | Asthma | F_T_2     | -          | - | -0.058 | 0.043 | 1.73E-01 | 2.31E-01 | -0.142 | 0.025  | -     | -     | 0.599 | 0.114 |
| 3 | GoDMC | BACH2 | cg09790829 | Asthma | Finngen_2 | Wald ratio | 1 | -0.446 | 0.108 | 3.85E-05 | 7.70E-05 | -0.658 | -0.233 | -     | -     | -     | -     |
| 3 | GoDMC | BACH2 | cg09790829 | Asthma | TAGC_2    | Wald ratio | 1 | -0.663 | 0.095 | 2.58E-12 | 1.23E-11 | -0.848 | -0.477 | -     | -     | -     | -     |
| 3 | GoDMC | BACH2 | cg09790829 | Asthma | F_T_2     | -          | - | -0.560 | 0.108 | 2.31E-07 | 9.22E-07 | -0.773 | -0.348 | -     | -     | 0.561 | 0.131 |
| 3 | GoDMC | BACH2 | cg10913050 | Asthma | Finngen_2 | Wald ratio | 1 | -0.429 | 0.067 | 1.49E-10 | 1.19E-09 | -0.560 | -0.298 | -     | -     | -     | -     |
| 3 | GoDMC | BACH2 | cg10913050 | Asthma | TAGC_2    | Wald ratio | 1 | -0.631 | 0.090 | 3.07E-12 | 1.23E-11 | -0.808 | -0.454 | -     | -     | -     | -     |
| 3 | GoDMC | BACH2 | cg10913050 | Asthma | F_T_2     | -          | - | -0.521 | 0.101 | 2.21E-07 | 9.22E-07 | -0.718 | -0.324 | -     | -     | 0.689 | 0.073 |
| 3 | GoDMC | BCL6  | cg17394304 | Asthma | Finngen_2 | Wald ratio | 1 | 0.222  | 0.049 | 5.67E-06 | 1.77E-05 | 0.126  | 0.318  | -     | -     | -     | -     |
| 3 | GoDMC | BCL6  | cg17394304 | Asthma | TAGC_2    | Wald ratio | 1 | 0.100  | 0.073 | 1.73E-01 | 2.61E-01 | -0.044 | 0.243  | -     | -     | -     | -     |
| 3 | GoDMC | BCL6  | cg17394304 | Asthma | F_T_2     | -          | - | 0.184  | 0.041 | 5.86E-06 | 1.17E-05 | 0.104  | 0.264  | -     | -     | 0.480 | 0.166 |
| 3 | GoDMC | MRV11 | cg17542333 | Asthma | Finngen_2 | Wald ratio | 1 | 0.249  | 0.066 | 1.60E-04 | 2.56E-04 | 0.120  | 0.379  | -     | -     | -     | -     |
| 3 | GoDMC | MRV11 | cg17542333 | Asthma | TAGC_2    | Wald ratio | 1 | 0.309  | 0.097 | 1.45E-03 | 3.87E-03 | 0.119  | 0.500  | -     | -     | -     | -     |
| 3 | GoDMC | MRV11 | cg17542333 | Asthma | F_T_2     | -          | - | 0.268  | 0.055 | 9.02E-07 | 2.41E-06 | 0.161  | 0.375  | -     | -     | 0.000 | 0.611 |
| 3 | GoDMC | RAB13 | cg26008365 | Asthma | Finngen_2 | Wald ratio | 1 | 0.151  | 0.079 | 5.55E-02 | 6.34E-02 | -0.004 | 0.305  | -     | -     | -     | -     |
| 3 | GoDMC | RAB13 | cg26008365 | Asthma | TAGC_2    | Wald ratio | 1 | 0.111  | 0.125 | 3.72E-01 | 4.25E-01 | -0.133 | 0.356  | -     | -     | -     | -     |
| 3 | GoDMC | RAB13 | cg26008365 | Asthma | F_T_2     | -          | - | 0.140  | 0.067 | 3.61E-02 | 5.78E-02 | 0.009  | 0.270  | -     | -     | 0.000 | 0.788 |

nsnp, the number of SNPs; CI, confidence intervals; hetero\_pval, p-value of Cochran Q test assessing heterogeneity of MR analysis; ple\_pval, p-value of MR-Egger regression examining horizontal pleiotropy effect of MR results; I2, I2 statistic assessing the heterogeneity of meta-analysis; pval\_Q, p-value of Cochran's Q test of meta-analysis; Finngen, exposure from FSH and outcome from Finngen; TAGC, exposure from FSH and outcome from Trans-National Asthma Genetic Consortium (TAGC); F\_T, meta-analysis of results from FSH→Finngen and FSH→TAGC; Finngen\_2, exposure from GoDMC and outcome from Finngen; TAGC\_2, exposure from GoDMC and outcome from TAGC; F\_T\_2, meta-analysis of results from GoDMC→Finngen and GoDMC→TAGC.

Table S22 Colocalization analysis between additional DNA methylation from GoDMC and asthma from UKB

| Source exposure | Gene exposure | ID.exposure | outcome | ID.outcome | p1       | p2       | p12      | PP.H0.abf | PP.H1.abf | PP.H2.abf | PP.H3.abf | PP.H4.abf |
|-----------------|---------------|-------------|---------|------------|----------|----------|----------|-----------|-----------|-----------|-----------|-----------|
| GoDMC           | AFF3          | cg04109781  | Asthma  | UKB        | 1.00E-04 | 1.00E-04 | 1.00E-05 | 0.000     | 0.004     | 0.000     | 0.465     | 0.531     |
| GoDMC           | AFF3          | cg09521647  | Asthma  | UKB        | 1.00E-04 | 1.00E-04 | 1.00E-05 | 0.000     | 0.000     | 0.000     | 0.036     | 0.963     |
| GoDMC           | AFF3          | cg17356467  | Asthma  | UKB        | 1.00E-04 | 1.00E-04 | 1.00E-05 | 0.000     | 0.018     | 0.000     | 0.374     | 0.608     |
| GoDMC           | BACH2         | cg09745430  | Asthma  | UKB        | 1.00E-04 | 1.00E-04 | 1.00E-05 | 0.000     | 0.000     | 0.000     | 0.260     | 0.740     |
| GoDMC           | BACH2         | cg09790829  | Asthma  | UKB        | 1.00E-04 | 1.00E-04 | 1.00E-05 | 0.000     | 0.000     | 0.000     | 0.028     | 0.972     |
| GoDMC           | BACH2         | cg09818385  | Asthma  | UKB        | 1.00E-04 | 1.00E-04 | 1.00E-05 | 0.000     | 0.000     | 0.000     | 0.044     | 0.956     |
| GoDMC           | BACH2         | cg10913050  | Asthma  | UKB        | 1.00E-04 | 1.00E-04 | 1.00E-05 | 0.000     | 0.000     | 0.000     | 0.070     | 0.930     |
| GoDMC           | BACH2         | cg15380603  | Asthma  | UKB        | 1.00E-04 | 1.00E-04 | 1.00E-05 | 0.000     | 0.000     | 0.000     | 0.044     | 0.956     |
| GoDMC           | BACH2         | cg25670076  | Asthma  | UKB        | 1.00E-04 | 1.00E-04 | 1.00E-05 | 0.000     | 0.000     | 0.000     | 0.278     | 0.722     |
| GoDMC           | BACH2         | cg27644327  | Asthma  | UKB        | 1.00E-04 | 1.00E-04 | 1.00E-05 | 0.000     | 0.000     | 0.000     | 0.310     | 0.690     |
| GoDMC           | BCL6          | cg06027254  | Asthma  | UKB        | 1.00E-04 | 1.00E-04 | 1.00E-05 | 0.000     | 0.305     | 0.000     | 0.070     | 0.625     |
| GoDMC           | BCL6          | cg17394304  | Asthma  | UKB        | 1.00E-04 | 1.00E-04 | 1.00E-05 | 0.000     | 0.213     | 0.000     | 0.093     | 0.694     |
| GoDMC           | BCL6          | cg19198148  | Asthma  | UKB        | 1.00E-04 | 1.00E-04 | 1.00E-05 | 0.000     | 0.091     | 0.000     | 0.001     | 0.908     |
| GoDMC           | CAMK4         | cg23385847  | Asthma  | UKB        | 1.00E-04 | 1.00E-04 | 1.00E-05 | 0.000     | 0.002     | 0.000     | 0.018     | 0.981     |
| GoDMC           | ING5          | cg12508715  | Asthma  | UKB        | 1.00E-04 | 1.00E-04 | 1.00E-05 | 0.000     | 0.001     | 0.000     | 0.062     | 0.937     |
| GoDMC           | ING5          | cg23350296  | Asthma  | UKB        | 1.00E-04 | 1.00E-04 | 1.00E-05 | 0.000     | 0.000     | 0.000     | 0.029     | 0.971     |
| GoDMC           | MRV11         | cg17542333  | Asthma  | UKB        | 1.00E-04 | 1.00E-04 | 1.00E-05 | 0.000     | 0.000     | 0.000     | 0.016     | 0.984     |
| GoDMC           | RAB13         | cg23251254  | Asthma  | UKB        | 1.00E-04 | 1.00E-04 | 1.00E-05 | 0.000     | 0.245     | 0.000     | 0.076     | 0.678     |
| GoDMC           | RAB13         | cg24543596  | Asthma  | UKB        | 1.00E-04 | 1.00E-04 | 1.00E-05 | 0.000     | 0.232     | 0.000     | 0.067     | 0.701     |
| GoDMC           | RAB13         | cg26008365  | Asthma  | UKB        | 1.00E-04 | 1.00E-04 | 1.00E-05 | 0.000     | 0.241     | 0.000     | 0.055     | 0.705     |
| GoDMC           | RAB13         | cg26336059  | Asthma  | UKB        | 1.00E-04 | 1.00E-04 | 1.00E-05 | 0.000     | 0.252     | 0.000     | 0.073     | 0.675     |
| GoDMC           | RBM17         | cg02773640  | Asthma  | UKB        | 1.00E-04 | 1.00E-04 | 1.00E-05 | 0.000     | 0.138     | 0.000     | 0.061     | 0.801     |
| GoDMC           | RORC          | cg03005293  | Asthma  | UKB        | 1.00E-04 | 1.00E-04 | 1.00E-05 | 0.000     | 0.001     | 0.000     | 0.009     | 0.990     |

p1, a prior probability for a SNP being associated with trait 1 only; p2, a prior probability for a SNP being associated with trait 2 only; p12, a prior probability for a SNP being associated with both traits.

Table S23 Mediation analysis using SMR: DNA methylation on asthma through gene expression in discovery phase

| Expo Gene | Expo ID    | Media Gene | Outcome | Outco ID | XY b   | XY se | XY FDR   | XZ b   | XZ se | XZ FDR   | YZ b   | YZ se | YZ FDR   | Media effect pro | lo Media pro | up Media pro | Media p  | Media FDR |
|-----------|------------|------------|---------|----------|--------|-------|----------|--------|-------|----------|--------|-------|----------|------------------|--------------|--------------|----------|-----------|
| ITPKB     | cg16265553 | ITPKB      | Asthma  | UKB      | -0.457 | 0.090 | 5.73E-07 | 0.251  | 0.069 | 3.87E-03 | -0.194 | 0.057 | 2.25E-02 | 0.353            | 0.108        | 0.598        | 4.76E-03 | 4.76E-03  |
| JAK2      | cg13661497 | JAK2       | Asthma  | UKB      | -2.572 | 0.339 | 6.67E-14 | -0.323 | 0.102 | 7.62E-03 | 0.122  | 0.033 | 9.57E-03 | 0.967            | 0.392        | 1.543        | 9.86E-04 | 1.97E-03  |

Expo, DNA methylation; Media, gene expression; Outcome, asthma; XY, the effect of DNA methylation on gene expression; XZ, the effect of DNA methylation on asthma; YZ, the effect of gene expression on asthma.



Table S24 Mediation analysis using TSMR: DNA methylation on asthma through gene expression in discovery phase

| Expo Gene | Expo ID    | Media Gene | Outcome | Outc o ID | XY b   | XY se | XY FDR    | XZ b   | XZ se | XZ FDR   | YZ b   | YZ se | YZ FDR   | Media effect pro | lo Media pro | up Media pro | Media p  | Media FDR |
|-----------|------------|------------|---------|-----------|--------|-------|-----------|--------|-------|----------|--------|-------|----------|------------------|--------------|--------------|----------|-----------|
| ITPKB     | cg16265553 | ITPKB      | Asthma  | UKB       | -0.457 | 0.081 | 1.48E-08  | 0.251  | 0.066 | 1.15E-03 | -0.194 | 0.056 | 8.37E-04 | 0.353            | 0.120        | 0.586        | 3.00E-03 | 3.00E-03  |
| JAK2      | cg13661497 | JAK2       | Asthma  | UKB       | -2.572 | 0.110 | 6.98E-120 | -0.323 | 0.094 | 2.39E-03 | 0.131  | 0.029 | 2.28E-05 | 1.041            | 0.580        | 1.503        | 9.81E-06 | 1.96E-05  |

Expo, DNA methylation; Media, gene expression; Outcome, asthma; XY, the effect of DNA methylation on gene expression; XZ, the effect of DNA methylation on asthma; YZ, the effect of gene expression on asthma.

**Table S25 Mediation analysis using SMR: DNA methylation on asthma through gene expression in replication phase**

| Expo Gene | Expo ID    | Media Gene | Outcome | Outco ID | XY b   | XY se | XY FDR   | XZ b   | XZ se | XZ FDR   | YZ b   | YZ se | YZ FDR   | Media effect pro | lo Media pro | up Media pro | Media p  | Media FDR |
|-----------|------------|------------|---------|----------|--------|-------|----------|--------|-------|----------|--------|-------|----------|------------------|--------------|--------------|----------|-----------|
| ITPKB     | cg16265553 | ITPKB      | Asthma  | F_T_2    | -0.457 | 0.090 | 5.73E-07 | 0.204  | 0.074 | 1.52E-02 | -0.184 | 0.078 | 4.30E-02 | 0.412            | 0.033        | 0.791        | 3.33E-02 | 3.33E-02  |
| JAK2      | cg13661497 | JAK2       | Asthma  | F_T_2    | -2.572 | 0.339 | 6.67E-14 | -0.162 | 0.098 | 9.75E-02 | 0.119  | 0.036 | 1.63E-03 | 1.879            | 0.655        | 3.102        | 2.62E-03 | 5.24E-03  |

Expo, DNA methylation; Media, gene expression; Outcome, asthma; XY, the effect of DNA methylation on gene expression; XZ, the effect of DNA methylation on asthma; YZ, the effect of gene expression on asthma.

Table S26 Mediation analysis using TSMR: DNA methylation on asthma through gene expression in replication phase

| Expo Gene | Expo ID    | Media Gene | Outcome | Outco ID | XY b   | XY se | XY FDR    | XZ b   | XZ se | XZ FDR   | YZ b   | YZ se | YZ FDR   | Media effect pro | lo Media pro | up Media pro | Media p | Media FDR |
|-----------|------------|------------|---------|----------|--------|-------|-----------|--------|-------|----------|--------|-------|----------|------------------|--------------|--------------|---------|-----------|
| ITPKB     | cg16265553 | ITPKB      | Asthma  | F_T_2    | -0.457 | 0.081 | 1.48E-08  | 0.205  | 0.073 | 2.05E-02 | -0.184 | 0.075 | 3.21E-02 | 0.410            | 0.053        | 0.768        | 0.025   | 2.45E-02  |
| JAK2      | cg13661497 | JAK2       | Asthma  | F_T_2    | -2.572 | 0.110 | 6.98E-120 | -0.164 | 0.096 | 8.87E-02 | 0.109  | 0.032 | 7.57E-04 | 1.712            | 0.705        | 2.718        | 0.001   | 1.72E-03  |

Expo, DNA methylation; Media, gene expression; Outcome, asthma; XY, the effect of DNA methylation on gene expression; XZ, the effect of DNA methylation on asthma; YZ, the effect of gene expression on asthma.

Table S27 SMR analysis of lung gene expression on asthma

| Source exposure | Gene exposure | outcome | ID.outcome | topSNP     | A1 | A2 | b_SM   | se_SM | p_SM     | FDR_SM   | p_HEIDI | nsnp_HEIDI | I2    | pval_Q |
|-----------------|---------------|---------|------------|------------|----|----|--------|-------|----------|----------|---------|------------|-------|--------|
| Gtex            | RBM6          | Asthma  | Finngen    | rs4688755  | A  | G  | -0.072 | 0.022 | 8.19E-04 | 2.46E-03 | 0.051   | 20         | -     | -      |
| Gtex            | RBM6          | Asthma  | TAGC       | rs2245365  | A  | C  | -0.042 | 0.031 | 1.66E-01 | 4.53E-01 | 0.578   | 20         | -     | -      |
| Gtex            | RBM6          | Asthma  | UKB        | rs4688755  | A  | G  | -0.059 | 0.016 | 3.25E-04 | 9.74E-04 | 0.200   | 20         | -     | -      |
| Gtex            | RBM6          | Asthma  | SUM        | -          | -  | -  | -0.060 | 0.012 | 4.68E-07 | 1.40E-06 | -       | -          | 0.000 | 0.724  |
| Gtex            | HOXB-AS1      | Asthma  | Finngen    | rs6504340  | G  | A  | 0.023  | 0.030 | 4.40E-01 | 4.40E-01 | 0.173   | 20         | -     | -      |
| Gtex            | HOXB-AS1      | Asthma  | TAGC       | rs6504340  | G  | A  | 0.045  | 0.044 | 3.02E-01 | 4.53E-01 | 0.842   | 20         | -     | -      |
| Gtex            | HOXB-AS1      | Asthma  | UKB        | rs6504340  | G  | A  | 0.054  | 0.024 | 2.09E-02 | 2.09E-02 | 0.252   | 20         | -     | -      |
| Gtex            | HOXB-AS1      | Asthma  | SUM        | -          | -  | -  | 0.043  | 0.017 | 1.20E-02 | 1.20E-02 | -       | -          | 0.000 | 0.711  |
| Gtex            | CEP95         | Asthma  | Finngen    | rs17650301 | C  | A  | -0.186 | 0.083 | 2.45E-02 | 3.68E-02 | -       | -          | -     | -      |
| Gtex            | CEP95         | Asthma  | TAGC       | rs17650301 | C  | A  | -0.054 | 0.118 | 6.46E-01 | 6.46E-01 | -       | -          | -     | -      |
| Gtex            | CEP95         | Asthma  | UKB        | rs17650301 | C  | A  | -0.237 | 0.077 | 2.15E-03 | 3.22E-03 | -       | -          | -     | -      |
| Gtex            | CEP95         | Asthma  | SUM        | -          | -  | -  | -0.184 | 0.051 | 3.10E-04 | 4.64E-04 | -       | -          | 0.000 | 0.432  |

HEIDI: heterogeneity in dependent instruments; nsnp, the number of SNPs; I2, I2 statistic assessing the heterogeneity of meta-analysis; pval\_Q, p-value of Cochran's Q test of meta-analysis.

Table S28 TSMR analysis of lung gene expression on asthma

| Source exposure | Gene exposure | Outcome | ID.outcome | Method     | nsp | b      | se    | pval     | FDR      | or    | or_lci95 | or_uci95 | I2    | pval_Q |
|-----------------|---------------|---------|------------|------------|-----|--------|-------|----------|----------|-------|----------|----------|-------|--------|
| Gtex            | RBM6          | Asthma  | Finngen    | Wald ratio | 1   | -0.072 | 0.021 | 6.83E-04 | 2.05E-03 | 0.931 | 0.893    | 0.970    | -     | -      |
| Gtex            | RBM6          | Asthma  | TAGC       | Wald ratio | 1   | -0.040 | 0.031 | 1.97E-01 | 4.60E-01 | 0.961 | 0.904    | 1.021    | -     | -      |
| Gtex            | RBM6          | Asthma  | UKB        | Wald ratio | 1   | -0.059 | 0.016 | 2.55E-04 | 3.83E-04 | 0.943 | 0.914    | 0.973    | -     | -      |
| Gtex            | RBM6          | Asthma  | SUM        | -          | -   | -0.060 | 0.012 | 3.73E-07 | 1.12E-06 | 0.942 | 0.920    | 0.964    | 0.000 | 0.692  |
| Gtex            | HOXB-AS1      | Asthma  | Finngen    | Wald ratio | 1   | 0.023  | 0.030 | 4.38E-01 | 4.38E-01 | 1.023 | 0.965    | 1.085    | -     | -      |
| Gtex            | HOXB-AS1      | Asthma  | TAGC       | Wald ratio | 1   | 0.044  | 0.043 | 3.07E-01 | 4.60E-01 | 1.045 | 0.960    | 1.138    | -     | -      |
| Gtex            | HOXB-AS1      | Asthma  | UKB        | Wald ratio | 1   | 0.054  | 0.023 | 1.63E-02 | 1.63E-02 | 1.056 | 1.010    | 1.104    | -     | -      |
| Gtex            | HOXB-AS1      | Asthma  | SUM        | -          | -   | 0.043  | 0.017 | 9.58E-03 | 9.58E-03 | 1.044 | 1.011    | 1.079    | 0.000 | 0.704  |
| Gtex            | CEP95         | Asthma  | Finngen    | Wald ratio | 1   | -0.186 | 0.072 | 9.59E-03 | 1.44E-02 | 0.830 | 0.721    | 0.956    | -     | -      |
| Gtex            | CEP95         | Asthma  | TAGC       | Wald ratio | 1   | -0.054 | 0.117 | 6.44E-01 | 6.44E-01 | 0.947 | 0.753    | 1.192    | -     | -      |
| Gtex            | CEP95         | Asthma  | UKB        | Wald ratio | 1   | -0.237 | 0.057 | 3.03E-05 | 9.08E-05 | 0.789 | 0.706    | 0.882    | -     | -      |
| Gtex            | CEP95         | Asthma  | SUM        | -          | -   | -0.197 | 0.042 | 2.29E-06 | 3.44E-06 | 0.821 | 0.757    | 0.891    | 0.000 | 0.369  |

nsp, the number of SNPs; CI, confidence intervals; I2, I2 statistic assessing the heterogeneity of meta-analysis; pval\_Q, p-value of Cochran's Q test of meta-analysis.

**Table S29 Phenoscanner: Identifying Instrumental Variables Related to Outcomes and Confounding Factors**

| Source | Gene.exposure | ID.exposure     | SNP        | A1 | A2 | trait                                 | ancestry | b      | se    | p        |
|--------|---------------|-----------------|------------|----|----|---------------------------------------|----------|--------|-------|----------|
| Blood  | ETS1          | ENSG00000134954 | rs55836957 | A  | C  | Eosinophil count                      | European | -0.027 | 0.004 | 8.91E-10 |
| Blood  | ETS1          | ENSG00000134954 | rs55836957 | A  | C  | Eosinophil percentage of granulocytes | European | -0.024 | 0.004 | 2.25E-08 |
| Blood  | ETS1          | ENSG00000134954 | rs55836957 | A  | C  | Eosinophil percentage of white cells  | European | -0.025 | 0.004 | 8.84E-09 |
| Blood  | ETS1          | ENSG00000134954 | rs55836957 | A  | C  | Allergic disease                      | European | -0.049 | 0.007 | 1.94E-12 |
| Blood  | JAK2          | cg02405213      | rs11789744 | A  | G  | Eosinophil count                      | European | 0.031  | 0.004 | 5.56E-15 |
| Blood  | JAK2          | cg02405213      | rs11789744 | A  | G  | Eosinophil percentage of granulocytes | European | 0.024  | 0.004 | 2.07E-09 |
| Blood  | JAK2          | cg02405213      | rs11789744 | A  | G  | Eosinophil percentage of white cells  | European | 0.028  | 0.004 | 1.64E-12 |
| Blood  | JAK2          | cg02405213      | rs11789744 | A  | G  | Neutrophil percentage of granulocytes | European | -0.023 | 0.004 | 1.23E-08 |
| Blood  | JAK2          | cg02405213      | rs11789744 | A  | G  | Platelet count                        | European | -0.025 | 0.004 | 6.10E-10 |
| Blood  | JAK2          | cg02405213      | rs11789744 | A  | G  | Sum eosinophil basophil counts        | European | 0.031  | 0.004 | 1.09E-14 |

**Table S30 TSMR/SMR analysis of blood gene expression on asthma after removing SNP related to outcomes or confounding factors**

| Gene.exposure   | ID.exposure | Outcome | ID.outcome | Method   | b      | se    | pval     | or    | or_lci95 | or_uci95 | hetero_pval | ple_pval | p_HEIDI  | nsnp_HEIDI |
|-----------------|-------------|---------|------------|----------|--------|-------|----------|-------|----------|----------|-------------|----------|----------|------------|
| cg02405213      | JAK2        | Asthma  | UKB        | TSMR/IVW | -0.024 | 0.011 | 2.76E-02 | 0.976 | 0.955    | 0.997    | 0.074       | 0.951    | -        | -          |
| ENSG00000134954 | ETS1        | Asthma  | UKB        | TSMR/IVW | 0.464  | 0.080 | 5.73E-09 | 1.590 | 1.360    | 1.859    | 0.723       | -        | -        | -          |
| ENSG00000134954 | ETS1        | Asthma  | UKB        | SMR      | 0.486  | 0.117 | 3.12E-05 | 1.626 | 1.293    | 2.044    | -           | -        | 2.74E-02 | 10         |

HEIDI: heterogeneity in dependent instruments; nsnp, the number of SNPs; hetero\_pval, p-value of Cochran Q test assessing heterogeneity of MR analysis; ple\_pval, p-value of MR-Egger regression examining horizontal pleiotropy effect of MR results.
